# Supplementary material for: Work of being an adult patient with chronic kidney disease: a systematic review of qualitative studies
Source: PubMed Central journal article supplement — BMJ Open. 2018 Sep 4;8(9):e023507. doi: 10.1136/bmjopen-2018-023507 (PMC6129107; doi:10.1136/bmjopen-2018-023507), 2018-09-04
Supplement: bmjopen-2018-023507.draft_revisions.pdf [file bmjopen-2018-023507.draft_revisions.pdf]

# BMJ Open

BMJ Open is committed to open peer review. As part of this commitment we make the peer review history of every article we publish publicly available.

When an article is published we post the peer reviewers' comments and the authors' responses online. We also post the versions of the paper that were used during peer review. These are the versions that the peer review comments apply to.

The versions of the paper that follow are the versions that were submitted during the peer review process. They are not the versions of record or the final published versions. They should not be cited or distributed as the published version of this manuscript.

BMJ Open is an open access journal and the full, final, typeset and author-corrected version of record of the manuscript is available on our site with no access controls, subscription charges or pay-per-view fees (<http://bmjopen.bmj.com>).

If you have any questions on BMJ Open's open peer review process please email [info.bmjopen@bmj.com](mailto:info.bmjopen@bmj.com)

# BMJ Open

## The Work of Being a Patient with Chronic Kidney Disease in Contexts of Socioeconomic Disadvantage: A Systematic Review of Qualitative Studies

|                               |                                                                                                                                                                                                                                                                                                                                                                                                                                                                                                                                                                                     |
|-------------------------------|-------------------------------------------------------------------------------------------------------------------------------------------------------------------------------------------------------------------------------------------------------------------------------------------------------------------------------------------------------------------------------------------------------------------------------------------------------------------------------------------------------------------------------------------------------------------------------------|
| Journal:                      | <i>BMJ Open</i>                                                                                                                                                                                                                                                                                                                                                                                                                                                                                                                                                                     |
| Manuscript ID                 | bmjopen-2018-023507                                                                                                                                                                                                                                                                                                                                                                                                                                                                                                                                                                 |
| Article Type:                 | Research                                                                                                                                                                                                                                                                                                                                                                                                                                                                                                                                                                            |
| Date Submitted by the Author: | 09-Apr-2018                                                                                                                                                                                                                                                                                                                                                                                                                                                                                                                                                                         |
| Complete List of Authors:     | Roberti, Javier; FINAER<br>Cummings, Amanda; University of Southampton, Faculty of Health Sciences<br>Myall, Michelle; University of Southampton, Faculty of Health Sciences<br>Harvey, Jonathan; University of Southampton, Faculty of Health Sciences<br>Lippiett, Kate; University of Southampton, Faculty of Health Sciences<br>Hunt, Katherine; University of Southampton, Faculty of Health Sciences<br>Cicora, Federico; FINAER<br>Alonso, Juan; Universidad de Buenos Aires, Faculty of Social Sciences<br>May, Carl; University of Southampton, Faculty of Health Sciences |
| Keywords:                     | Treatment burden, Chronic kidney disease, Systematic review, Haemodialysis, Kidney transplant                                                                                                                                                                                                                                                                                                                                                                                                                                                                                       |
|                               |                                                                                                                                                                                                                                                                                                                                                                                                                                                                                                                                                                                     |

SCHOLARONE™  
Manuscripts

1  
2  
3 **1 The Work of Being a Patient with Chronic Kidney Disease in Contexts of**  
4  
5 **2 Socioeconomic Disadvantage: A Systematic Review of Qualitative Studies**  
6  
7  
8  
9

10 **4 Authors**

11  
12 Javier Roberti<sup>1</sup> javierroberti@gmail.com  
13

14 Amanda Cummings<sup>2,3</sup> a.cummings@soton.ac.uk  
15

16 Michelle Myall<sup>2,3</sup> m.myall@soton.ac.uk  
17

18 Jonathan Harvey<sup>2</sup> jonathan.harvey@open.ac.uk  
19

20 Kate Lippiett<sup>2</sup> kalcle15@soton.ac.uk  
21

22 Katherine Hunt<sup>2</sup> k.j.hunt@soton.ac.uk  
23

24 Federico Cicora<sup>1</sup> fcicora5@gmail.com  
25

26 Juan Pedro Alonso<sup>4</sup> juanpedroalonso79@gmail.com  
27

28 Carl R. May<sup>2,3,5</sup> c.r.may@soton.ac.uk  
29  
30  
31  
32  
33

34 **15 Author affiliations**

35  
36 1. FINAER, Foundation for Research and Assistance of Kidney Disease, Buenos Aires,  
37  
38 Argentina.  
39

40 2. Faculty of Health Sciences, University of Southampton, Southampton, UK  
41

42 3. NIHR CLAHRC Wessex, University of Southampton, Southampton, UK  
43

44 4. Faculty of Social Sciences, Universidad de Buenos Aires, Argentina  
45

46 5. University Hospital Southampton NHS Foundation Trust, Southampton, UK  
47  
48  
49

50 **22 Corresponding author**

51  
52 Javier Roberti, FINAER, Palestina 525, 1182 Buenos Aires, Argentina  
53

54 email: javierroberti@gmail.com. Phone: +5491135633749.  
55  
56  
57  
58  
59  
60

## 1       2       3       4       5       6       7       8       9       10       11       12       13       14       15       16       17       18       19       20       21       22       23       24       25       26       27       28       29       30       31       32       33       34       35       36       37       38       39       40       41       42       43       44       45       46       47       48       49       50       51       52       53       54       55       56       57       58       59       60

1       2       3       4       5       6       7       8       9       10       11       12       13       14       15       16       17       18       19       20       21       22       23       24       25       26       27       28       29       30       31       32       33       34       35       36       37       38       39       40       41       42       43       44       45       46       47       48       49       50       51       52       53       54       55       56       57       58       59       60

**ABSTRACT**

**Introduction:** Chronic kidney disease (CKD) requires patients and caregivers to invest in self-care and self-management of their disease. We aimed to describe the *work* for patients and caregivers that follows from these investments and develop an understanding of burden of treatment (BoT), extending it to experiences in low- and middle-income countries.

**Methods:** Systematic review of qualitative primary studies, that builds on EXPERTS 1 Protocol, PROSPERO: CRD42014014547. We included research published in English, Spanish and Portuguese, from 2000 to present, describing experience of illness and healthcare of people with CKD and caregivers. Searches were conducted in MEDLINE, Embase, CINAHL Plus, PsycINFO, Scopus, SciELO, and Redalyc. Content was analysed with theoretical framework using middle-range theories.

**Results:** Searches resulted in 256 studies from 31 countries (5063 patients and 929 carers). Socio-economic status was central to the experience of CKD and treatment. Unfunded healthcare was fragmented and of indeterminate duration, with patients often depending on emergency care. Treatment could lead to unemployment, and in turn, to un- or under-insurance. Patients feared catastrophic events because of diminished financial capacity and made strenuous efforts to prevent them. Transportation to and from haemodialysis centre, with variable availability and cost, was a common problem, aggravated for patients in non-urban areas, or with young children, and low resources. Additional work for those un- or under-insured included fund-raising. Transplanted patients needed to manage finances and responsibilities in an uncertain context. Information on the disease, treatment options, and immunosuppressants side-effects was a widespread problem.

**Conclusions:** Being a person with CKD always implied high burden, time-consuming, invasive and exhausting tasks, impacting on all aspects of patients and caregivers' lives. Further research on BoT could inform healthcare professionals and policy makers about factors that shape patients' trajectories and contribute towards a better illness experience for those living with CKD.

### Article summary

- We analysed data with a coding framework supported by middle-range theories to understand the work involved in being a person with CKD.
- Comprehensive inclusion of publications in English, Spanish, and Portuguese, which may enhance the transferability of our findings.
- The variety of methodologies, quality of reporting, and heterogeneity of perspectives make synthesis difficult.

**Key words:** chronic kidney disease, burden of treatment, treatment burden, haemodialysis, transplantation, chronic illness

### INTRODUCTION

Chronic Kidney Disease (CKD) contributes significantly to global morbidity and mortality.<sup>1-4</sup> Even in its early stages, the risk of death, cardiovascular events, cerebrovascular disorders and hospitalization is increased.<sup>1-4</sup> Worldwide, about 500 million people are affected by CKD; about 80% of these live in low and middle-income countries (LMIC); an estimated 1.5 million people with CKD receive renal replacement therapy (RRT) with either dialysis or transplantation.<sup>1 5 6</sup> The number of

1  
2  
3 1 people receiving RRT is increasing and will more than double by 2030, but a  
4  
5 2 significant number of people without access to this type of live-saving treatment will  
6  
7 3 remain.<sup>7</sup> In 2010, at least 2.28 million people might have died because of lack of  
8  
9  
10 4 access to RRT, mostly in LMIC in Asia, Africa, and Latin America.<sup>7</sup>  
11  
12 5

13 6 Much is now known about the pathophysiological and treatment trajectories of CKD,  
14  
15 7 and about the associated burden of symptoms experienced by patients. More  
16  
17 8 recently, there has been increasing interest in the way that complex long-term  
18  
19 9 conditions require patients and their carers to invest in self-care and self-  
20  
21 10 management of their disease.<sup>8-13</sup> The work for patients and carers that follows from  
22  
23 11 these investments, including medication management, medical visits, laboratory  
24  
25 12 tests, lifestyle changes, and monitoring in addition to the activities done as part of  
26  
27 13 life, is here termed burden of treatment (BoT), which adds to the burden of  
28  
29 14 symptoms (BoS).<sup>8 11 14</sup> Research on BoT has focused on long-term conditions such as  
30  
31 15 diabetes, chronic obstructive pulmonary disease and chronic heart failure with the  
32  
33 16 development of analytic framework and patient created taxonomies.<sup>8 14-25</sup> Patients  
34  
35 17 and carers are expected to actively participate in managing both index conditions  
36  
37 18 and comorbidities and, depending on their resources or lack thereof, they often  
38  
39 19 need to negotiate or renegotiate the responsibilities that healthcare providers and  
40  
41 20 healthcare systems assign to them.<sup>11 26 27</sup> Patient and carers' experience in managing  
42  
43 21 the disease and its treatment, including their choices and expectations, is affected by  
44  
45 22 structural, relational and resilience factors; the interactions among these factors  
46  
47 23 remain understudied.<sup>28</sup> The aim of this study is to develop specific understanding of  
48  
49  
50  
51  
52  
53  
54  
55  
56  
57  
58  
59  
60

1 treatment burden experienced by people with CKD extending it to experiences of  
2 uninsured and under-insured patients in LMIC.

## 3 4 **METHODS**

5 This is a systematic review of primary qualitative studies, which builds on the  
6 published EXPERTS1 Protocol and its meta-review of qualitative reviews.<sup>28 29</sup>  
7 PROSPERO registration number is CRD42014014547. This review follows the  
8 Enhancing Transparency in Reporting the Synthesis of Qualitative Research (ENTREQ)  
9 framework.<sup>30</sup> We interrogated a subset of qualitative primary research papers  
10 concerned with CKD identified by EXPERTS1 qualitative meta-review to understand  
11 the dynamics of patient experience of complexity and treatment burden in long-term  
12 life-limiting conditions. EXPERTS1 search was updated and expanded to Spanish and  
13 Portuguese language literature.

### 14 15 **Eligibility, inclusion and exclusion criteria**

16 Eligibility criteria for study inclusion were developed using the PICO (participants,  
17 interventions, comparators, and outcomes) framework (Table 1). Inclusion criteria  
18 were primary qualitative and mixed-method studies of adult patients diagnosed with  
19 CKD in any stage and their formal or informal carers; in any type of treatment or  
20 healthcare provision; not limited to comparative studies; with qualitative data on the  
21 patients and carers' experiences on any aspect of CKD and its treatments; in English,  
22 Spanish and Portuguese. Following the EXPERTS1 protocol, studies were excluded if  
23 they were of other EXPERTS1 index conditions; if they reported results of  
24 treatments, interventions, tests or surveys; were guidelines, discussions of the

1  
2  
3 literature or editorials, notes, news, letters, and case reports; if the experiences  
4  
5 described by patients and carers could not be clearly discriminated.<sup>29</sup> Studies  
6  
7 describing experiences of children with CKD were excluded because their BoT may  
8  
9 be significantly different from that of adult patients. The year of publication 2000  
10  
11 onward was established to include current treatments.  
12  
13  
14  
15

### 16 17 **Study selection**

18  
19 A first search for the EXPERTS1 meta-review was conducted in MEDLINE, Embase,  
20  
21 CINAHL Plus, PsycINFO, and Scopus. For this review, searches were updated using  
22  
23 the same databases and expanded to include studies published in Spanish and  
24  
25 Portuguese with additional searches in the Iberoamerican databases SciELO  
26  
27 (Scientific Electronic Library Online), and Redalyc (Red de Revistas Científicas de  
28  
29 América Latina y el Caribe, España y Portugal). Searches were completed by April  
30  
31 2017 and identified papers published between 1 January 2000 and March 2017.  
32  
33 Search strategy is included in Appendix 1. For a first set of studies, titles and  
34  
35 abstracts were independently screened by AC, MM and CRM, disagreements  
36  
37 resolved by JH. Full text papers (n=1238) were obtained and screened by JH, KAL and  
38  
39 MM; disagreements resolved by KH or AC. Of 606 articles, 191 were related to CKD.  
40  
41  
42 For a second set, updated results in English and studies in Spanish and Portuguese  
43  
44 were screened by JR, JPA, disagreements resolved by FC. Two authors (JR, JPA)  
45  
46 assessed papers against the Critical Appraisal Skills Program (CASP) qualitative  
47  
48 research checklist.<sup>31</sup> As there is no accepted criteria for the exclusion of qualitative  
49  
50 studies based appraisal score, we did not exclude studies based on quality. See  
51  
52  
53  
54  
55  
56 Figure 1 for screening and selection process.  
57  
58  
59  
60



## **Data extraction and analysis**

Data outlining study characteristics were extracted into table 2. Manuscripts were entered into Atlas.Ti v7.5.12 (Scientific Software Development GmbH). The results sections and participant quotations of the primary studies were analysed line-by-line using directed content analysis, sometimes called framework analysis.<sup>32</sup> The coding frame drew on concepts from the Burden of Treatment Theory and the Cognitive Authority Theory.<sup>16-19 27 33 34</sup> Coding was conducted by JR and CRM, with a third party involved for disagreements (JPA), and reviewed and discussed by two researchers (AC, MM). Refinement of the coding frame and analysis was iterative, codes were identified or merged reading the result sections of primary studies and consulting the theoretical framework. Investigator triangulation (comparison of results of two or more researchers) was used to capture relevant issues, reflect participants' experience as reported, and ensure the credibility of the findings.

## **RESULTS**

Combined searches yielded 5407 citations and resulted in 256 studies from 31 countries included in the final analysis. Three papers did not report the number of participants, but in the remaining 253 papers, a total of 5063 patients and 929 carers were included. Countries most frequently represented in the studies were: United States with 52 (20.3%), UK with 46 (18.0%), Brazil with 28 (11%), Australia with 27 (11%), Canada with 18 (7.1%), Sweden with 18 (7.1%), New Zealand with 8 (3.1%), and Iran with 7 (2.7%) studies. Table 3 shows illustrative quotations and table 4 shows summary of results.

## 1 **Structural inequalities**

2 *Access to care.* Poverty and other socio-economic disadvantages such as  
3  
4 unemployment or poor housing conditions were defining factors for lack of  
5  
6 treatment or interrupted care.<sup>35-50</sup> Living as a person with CKD always implied some  
7  
8 degree of financial burden, from having to pay for the whole dialysis treatment or  
9  
10 transplantation surgery to out-of-pocket payments of incidentals, even in countries  
11  
12 with universal coverage.<sup>33 45-47 49 51-61</sup> Poorly funded or unfunded healthcare resulted  
13  
14 in fragmented treatment across healthcare systems.<sup>45 46 62</sup> Although patients who  
15  
16 had difficulties affording treatment were naturally more concerned with accessing  
17  
18 healthcare than in improving services, they recognized fragmentation and lack of  
19  
20 integration as important problems.<sup>38 43 46-49</sup> Where government or private insurance  
21  
22 coverage of CKD treatment was limited, e.g. Mexico or India, patients paid for some  
23  
24 or all the following: vascular access, hospitalization, medical visits, haemodialysis  
25  
26 sessions, medication, tests, prescribed food, transport and meals.<sup>43 45-48 58 63</sup> In such  
27  
28 settings, patients received dialysis treatment only if they could afford it or when they  
29  
30 had access to free sessions.<sup>43 45-48 58 63</sup> Medication was sometimes counterfeit,  
31  
32 obtained on the black market, as legitimate medication was beyond patients'  
33  
34 reach.<sup>47</sup> For the uninsured, dependence on emergency care added uncertainty and  
35  
36 risk, whatever their treatment modality, as in the case of many undocumented and  
37  
38 uninsured immigrants in the United States.<sup>33 45-47 50 64</sup> In countries with poor  
39  
40 healthcare infrastructure, patients reported shortage of public specialized hospitals,  
41  
42 long delays to undergo examinations, limited number of haemodialysis machines  
43  
44 available, lack of ward space, or poor bed conditions in hospitals, e.g. poor hygiene,  
45  
46  
47  
48  
49  
50  
51  
52  
53  
54  
55  
56  
57  
58  
59  
60

1  
2  
3 worn-out mattresses, shortage of linen; to avoid delays, patients sometimes had  
4  
5 tests performed by private providers.<sup>38 48 58 65 66</sup>  
6  
7  
8

9  
10 When home dialysis was available, patients had to pay for transport to training,  
11  
12 appointments, and other check-ups; moreover, some equipment, supplies, increased  
13  
14 utility bills, and home modifications represented unexpected expenses.<sup>49 51 59 67-71</sup> In  
15  
16 countries with coverage of RRT, for patients whose first language was different from  
17  
18 that where treatment was received, as in the case of migrants, communication was a  
19  
20 barrier for discussions with healthcare professionals; family members and  
21  
22 neighbours acted as translators at appointments.<sup>51 72-74</sup> Where language was shared,  
23  
24 communications between clinicians and patients of different ethnic origins—for  
25  
26 example, Australian Aborigines and New Zealand Maoris—was often itself a source  
27  
28 of conflict and disadvantage, because of prejudice.<sup>51 55-57 75-80</sup>  
29  
30  
31  
32  
33  
34

35 In some countries, the transplantation procedure could be particularly expensive,  
36  
37 even at public hospitals.<sup>33 45-47 64 81</sup> Moreover, patients sometimes found that the  
38  
39 expensive immunosuppressants necessary after the transplant were not covered by  
40  
41 their insurance; other patients who obtained information about the high costs of  
42  
43 immunosuppressants and realising that they could not afford them, were forced to  
44  
45 continue with dialysis until it failed.<sup>47 81-83</sup> In Mexico, structural constraints resulted  
46  
47 in transplanted patients being sent back to small peripheral clinics with no  
48  
49 transplantation expertise, increasing the risk of iatrogenic or poorly managed  
50  
51 complications.<sup>81</sup>  
52  
53  
54  
55  
56  
57  
58  
59  
60

1  
2  
3 1 *Housing conditions.* Unsuitable housing was a barrier to home dialysis if it could not  
4  
5 2 accommodate equipment, and was impossible without an adequate electricity  
6  
7 3 supply.<sup>49 59</sup> In rented accommodation, landlords might not approve of necessary  
8  
9 4 modifications. Home dialysis was not a treatment option for those with no fixed  
10  
11 5 abode.<sup>49 59 68 84</sup>

12  
13  
14 6  
15  
16 7 *Employment status.* Patients who were physically able to continue working often had  
17  
18 8 informal or temporary jobs, with diminished income; others were forced into  
19  
20 9 unemployment, leading to new financial problems.<sup>37 43 50 58 67 70 85-89</sup> Unemployed  
21  
22 10 patients in the United States were covered by government or state schemes;  
23  
24 11 however, this coverage either diminished or ceased if they found work with a new  
25  
26 12 insurance.<sup>33 50</sup>

#### 13 14 **Patient workload**

15 *Self-care.* People with CKD had complex medication regimens managed through  
16  
17 16 dispensing aids, daily activities associated to medication taking such as meals, family  
18  
19 17 support, or a combination of these.<sup>38 44 69 84 90-104</sup> Anticipating dialysis, patients  
20  
21 18 underwent vascular access, a way to reach the blood for haemodialysis, undergoing  
22  
23 19 minor surgery and care needed to be taken to prevent infections or clotting.<sup>64 105-108</sup>  
24  
25 20 To care for their vascular access, patients restricted themselves from lifting heavy  
26  
27 21 objects, were alert for pain, or hardness, and protected the arm overall.<sup>106 109</sup>  
28  
29 22 Patients controlled their diets and fluid intake between dialysis sessions, and  
30  
31 23 managed food cravings and thirst with strategies such as thinking of the potential  
32  
33 24 detrimental consequences of drinking water, avoiding thoughts and behaviours that

1  
2  
3 could trigger thirst, and modifying social activities to minimise exposure to hot  
4  
5 weather, social pressure and temptation to intake certain foods or fluids.<sup>44 61 110-118</sup>  
6  
7 Women also faced potential family conflicts if they followed prescribed diets.<sup>43 60 119-</sup>  
8  
9  
10 <sup>122</sup> In certain cultures, comfort and wealth were associated with abundance of foods:  
11  
12 this meant that restrictive diets essential to self-care were sometimes stigmatized as  
13  
14 a sign of poverty.<sup>60 119 123</sup>  
15  
16  
17  
18

19 *Travel and time management.* People with CKD travelled to haemodialysis centres  
20  
21 three times a week, received treatment for several hours, and then transported  
22  
23 themselves home again; very often, transportation represented a problem for  
24  
25 patients because of pick-up delays, long distances, or high costs.<sup>13 45-47 51 74 84 124-131</sup>  
26  
27  
28 Patients receiving dialysis arranged their daily activities between treatment sessions,  
29  
30 adjusted the timing and intensity of their activities to their fatigue, and tried to  
31  
32 schedule medical appointments all on one day to avoid further interactions with the  
33  
34 healthcare system.<sup>53 132-143</sup> The treatment was seen by most patients as an emotional  
35  
36 and time imposition that caused boredom and frustration.<sup>61 144-150</sup> Time was often  
37  
38 spent waiting for visits, prescriptions, and tests.<sup>53 132-143 151</sup> Parents also arranged  
39  
40 child care while they were in sessions, or had to travel for treatment.<sup>47 51 53 152 153</sup>  
41  
42  
43  
44  
45  
46

47 *Home dialysis.* For patients receiving home dialysis, training was required which  
48  
49 necessitated extended periods of leave from work.<sup>59 68 154-156</sup> They and their families  
50  
51 had to adapt their home to accommodate equipment and materials, and spent more  
52  
53 time cleaning in case health workers assessed their housing conditions.<sup>150 156-160</sup>  
54  
55

56 Tasks associated included managing treatment at set times each day, recording  
57  
58  
59  
60

1  
2  
3 1 blood pressure and body weight, titrating medications, and adopting aseptic  
4  
5 2 techniques, as well as adhering to diet and fluid restrictions.<sup>154 155 161</sup> In the case of  
6  
7 3 developing peritonitis, workload increased as antibiotics had to be reconstituted and  
8  
9 4 injected.<sup>154 155</sup>

10  
11  
12 5  
13  
14 6 *Pre-transplantation adaptation.* People with CKD adjusted to being on the transplant  
15  
16 7 waiting list and prepared for the possibility of receiving a kidney from a deceased  
17  
18 8 donor at any time.<sup>41 113 131 162-168</sup> The tasks included hospital visits, several  
19  
20 9 investigations and tests, saving money for the operation, and maintaining robust  
21  
22 10 health; many potential recipients felt overwhelmed by all that was necessary.<sup>130 131</sup>  
23  
24 11 <sup>162 163 168-171</sup> Talking to others about their requirement for a kidney transplant  
25  
26 12 involved making the request itself to potential living donors, educating people about  
27  
28 13 CKD, treatment options and donation.<sup>37 45 162 172</sup>

29  
30  
31  
32  
33 14  
34  
35 15 *Post-transplantation adjustment.* After transplantation, patients' workload included  
36  
37 16 financial and occupational changes resulting from a new type of treatment and  
38  
39 17 status, managing complex medication regimens and managing social relations.<sup>82 83</sup>  
40  
41 18 <sup>173-178</sup> These tasks had to be balanced against the work of safeguarding access to  
42  
43 19 healthcare, organising their disability insurance, interacting with healthcare  
44  
45 20 providers, managing symptoms, monitoring medication side effects, and managing  
46  
47 21 self-care in relation to diet, fluid and physical activity.<sup>82 83 173-178</sup> Although  
48  
49 22 transplantation was seen as a route back to normality, it was laden with ambiguous  
50  
51 23 feelings towards the donor, unanticipated challenges in forming or maintaining  
52  
53 24 relationships, financial worries, the responsibility of supporting their family,  
54  
55  
56  
57  
58  
59  
60

1  
2  
3 1 disappointments when side effects were noticed, and a prevailing prognostic  
4  
5 2 uncertainty.<sup>81 83 173-175 179-184</sup>  
6  
7  
8  
9

10 4 *Fund-raising*. Those patients and carers in countries with limited health coverage  
11  
12 5 needed to perform additional work; poor families sold goods, products or services,  
13  
14 6 organized raffles to collect money, or obtained loans.<sup>45-47</sup> They also contacted  
15  
16 7 treatment centres, other patients, hospitals, and non-government organizations to  
17  
18 8 ask for free dialysis sessions or medication. For this reason, disadvantaged people  
19  
20 9 were advised by healthcare staff on how to seek help in charities and advocacy  
21  
22 10 organizations.<sup>45</sup>  
23  
24  
25  
26  
27

## 12 **Capacity**

13 13 *Physical and mental capacity*. The ability of people with CKD to carry out daily  
14  
15 14 activities, including their paid job, was limited by symptoms associated with the  
16  
17 15 disease and dialysis treatment, such as pain, fatigue, anxiety, depression, and sexual  
18  
19 16 problems,<sup>35 42 53 61 88 94 136 138 152 185-198</sup> sometimes overlooked by health  
20  
21 17 professionals.<sup>56 92 99 199-201</sup> When in poor physical health, patients relied on wider  
22  
23 18 family networks and neighbours to help with activities related to BoT such as  
24  
25 19 scheduling and attending medical appointments, arranging transportation to those  
26  
27 20 appointments, ordering and arranging medical supplies, and training; also, other  
28  
29 21 daily tasks such as food preparation, or shopping.<sup>35 116 159 202-206</sup> Carers were involved  
30  
31 22 in the dialysis procedure, accompanying patients to dialysis and responding to  
32  
33 23 psychosocial needs.<sup>43 67 95 127 139 141 159 207-213</sup> Patients' capacity to carry out the  
34  
35 24 activities related to healthcare were affected by insufficient financial resources and  
36  
37  
38  
39  
40  
41  
42  
43  
44  
45  
46  
47  
48  
49  
50  
51  
52  
53  
54  
55  
56  
57  
58  
59  
60

1 the fear of catastrophic consequences, such as death because of lack of dialysis  
2 treatment or immunosuppressive medication in the case of transplanted patients.<sup>45</sup>

3 47 50 214 215

4  
5 *Information deficits.* Patients reported that their information on the disease and  
6 treatment options was often insufficient or difficult to comprehend, particularly  
7 during the early stages, independent of income or coverage level; the desire for  
8 more patient-centred care were widely expressed.<sup>36 48 55 56 59 61 62 75 90 107 119 125-129 186</sup>

9 <sup>202 216-227</sup> Short clinic visits, unknown technical jargon, and high levels of anxiety were  
10 barriers to accessing information.<sup>59 100 220 228-231</sup> For organ donation and

11 transplantation, people with CKD usually received information through discussions  
12 with other patients, providers, social workers, financial representatives, the internet,  
13 and, in affluent populations, informative meetings.<sup>115 172 232-235</sup> Other patients could  
14 sometimes supply information about dialysis options, travelling, hygiene regimens,  
15 dietary restrictions, benefit advice, timing of treatment, and pain management.<sup>115 172</sup>

16 <sup>232-235</sup> In relation to transplantation, patients reported they needed practical  
17 information about the unexpected side effects of immunosuppressive medication;  
18 most frequently mentioned were higher risk of cancer, infections, weight gain, and  
19 fragile skin.<sup>176 182 183 236-239</sup> Other information needs for transplanted patients

20 included coping with emotions related to the transplant, what to do when a suitable  
21 organ became available, alternatives to transplantation, and how the waiting list  
22 worked.<sup>237 239-242</sup>

23



1  
2  
3 *Social support.* Most people highlighted the support from family, neighbours, friends,  
4  
5 staff, other patients and church communities; friends, staff and spiritual groups were  
6  
7 particularly important for those living alone.<sup>37 42 58 60 212 243-251</sup> A lack of social support  
8  
9 was also frequently reported.<sup>42 58 244 252</sup> In a UK study, patients socio-economic  
10  
11 disadvantage adversely affected the availability of social support, and it was  
12  
13 suggested that personal relationships sometimes broke down when potential donors  
14  
15 declined to donate.<sup>37</sup> Attending dialysis was sometimes seen as a social outlet,  
16  
17 where they could make friends with staff and patients. Younger participants often  
18  
19 considered the schedule flexibility of home dialysis as an opportunity for maintaining  
20  
21 their employment and contact with their family and established social networks.<sup>59 150</sup>  
22  
23  
24  
25  
26 To demonstrate resilience, some patients tried to maintain a sense of normalcy,  
27  
28 integrating the dialysis community into their social network.<sup>40 137 207 253</sup>  
29  
30  
31  
32

### 33 **Experienced control**

34  
35 *Personal control.* Feelings of personal control were achieved through learning how to  
36  
37 manage CKD, finding a balance between illness and normalcy, or even denying the  
38  
39 seriousness of their condition.<sup>215 253 254</sup> The experience of feelings of personal control  
40  
41 led to increased self-confidence and well-being.<sup>13 187 255</sup> Strategies for maintaining  
42  
43 control included requesting tests, withholding information from clinicians,  
44  
45 monitoring and modifying their treatments, and checking the activities of dialysis  
46  
47 nurses assisting them.<sup>137 255-260</sup> People with CKD experimented with their therapy to  
48  
49 determine if the prescriptions were really necessary, they also shortened dialysis  
50  
51 hours to reduce worsening symptoms, to meet work commitments, or to participate  
52  
53 in an unexpected social situation.<sup>52 53</sup> Lengthening treatment hours could facilitate  
54  
55  
56  
57  
58  
59  
60

1  
2  
3 higher than usual fluid removal or managing symptoms.<sup>52 53</sup> Some patients entrusted  
4  
5 decisions entirely to the care team, and this promoted feelings of security.<sup>59 68 100 105</sup>  
6  
7 <sup>261 262</sup> The main barrier to personal control was lack of information about treatments,  
8  
9 test results, and the course of their illness and that they could not choose when and  
10  
11 where to travel.<sup>13 41 59 61 195 236 263</sup> However, even when patients knew they were not  
12  
13 in control, they felt unsafe if the treatment went differently from what was  
14  
15 expected.<sup>264</sup> Patients recognised prognostic uncertainty, and their own fear of  
16  
17 incompetence as an obstacle to choosing the appropriate dialysis modality.<sup>52 70 90 130</sup>  
18  
19 <sup>131 148 159 220 255 263 265-269</sup> For many patients, home dialysis restored a sense of control  
20  
21 and freedom to manage their schedule, especially if it was nocturnal.<sup>49 68 156 217 258 270</sup>  
22  
23  
24 Dependence on emergency care or on fund-raising tasks to cover life-saving  
25  
26 treatment represented a severe case of lack of experienced control.<sup>33 45-47 50 64</sup>  
27  
28  
29  
30  
31  
32  
33 *Control and Decision-making.* Control translated into participation in decision-  
34  
35 making; which was affected by the healthcare staff's attitude toward the patients'  
36  
37 adherence to treatment.<sup>233</sup> Lack of choice in decision-making about dialysis modality  
38  
39 was very common; when possible, modality was negotiated and agreed after  
40  
41 discussions with clinicians and family members, reading educational material, or  
42  
43 attending informational meetings.<sup>199 265 268 269 271-274</sup> Home dialysis patients  
44  
45 appreciated training to build confidence and skills to utilise the machine.<sup>52 68 109 265 275</sup>  
46  
47  
48 <sup>276</sup> Patients in dialysis aspired to improve their situation by receiving a transplant,  
49  
50 motivating them to adhere to treatment; other motivations included family,  
51  
52 especially their children, work and beliefs.<sup>53 56 277</sup> People with CKD whose clinicians  
53  
54 failed to discuss care, eligibility and ineligibility for transplant, and potential donors  
55  
56  
57  
58  
59  
60

1  
2  
3 with them felt disempowered.<sup>37 53 55 56 75 76 167 278</sup> When relatives offered to donate a  
4  
5 kidney, many patients felt reluctant to accept this because of their concerns about  
6  
7 the future health of the donor; other patients had reservations about accepting  
8  
9 kidneys from deceased donors because of the donor's age and medical history.<sup>170 179</sup>

10  
11  
12 <sup>232</sup> Once transplanted, the main clinical objective was preserving the graft. However,  
13  
14 the disease and its treatment continued to be a significant burden on patients' social  
15  
16 capital and financial capacity, with unexpected side effects.<sup>47 61 87 94 165 279-281</sup>

17  
18  
19  
20  
21 *Carers' involvement.* Relatives wanted to be involved in discussions on dialysis  
22  
23 modality as dialysis would take up a large part of their lives.<sup>53 68 109 154-156 220 275 282</sup>  
24  
25  
26 Carers of patients on home dialysis needed to know more about the dialysis  
27  
28 techniques to feel confident about self-managing the treatment, they stressed the  
29  
30 importance of 24-hour telephone access for advice.<sup>59 67</sup> Family members were afraid  
31  
32 to bother the healthcare team<sup>256</sup>, and perceiving little power in comparison to health  
33  
34 professionals, used strategies to downplay their knowledge of the disease or the  
35  
36 treatment in front of them.<sup>207</sup> To cope with caring, carers sought support in  
37  
38 psychiatric help or religion when available, or support in religion.<sup>139 244</sup> Patients who  
39  
40 decided to stop dialysis did not usually ask for their carers' opinion; when physicians  
41  
42 thought the patient was too ill to decide, carers were consulted and felt death could  
43  
44 be liberating if the patient was in pain and with no response to treatment.<sup>132 139 159</sup>

45  
46  
47  
48  
49  
50  
51 *End-of-life decisions.* Some patients felt that advance care planning (ACP) was hard  
52  
53 and unnecessary as they trusted their families to make decisions; others were less  
54  
55 concerned, trusted their healthcare team and felt empowered.<sup>233 283 284</sup> Family  
56  
57

1  
2  
3 members felt ACP was necessary as a means to protect patients.<sup>285-287</sup> At the end-of-  
4  
5 life, maintaining control was a struggle with respect to autonomy and dignity.<sup>132 134</sup>  
6  
7 <sup>202 255</sup> Patients based their dialysis withdrawal or non-acceptance decision on having  
8  
9 lived a full life, on nature taking its course, on their fear of being a burden for their  
10  
11 families, their bodies being invaded and dialysis accelerating death.<sup>126 288</sup> For some,  
12  
13 the decision to withdraw from dialysis meant asserting their self-determination.<sup>255</sup>  
14  
15 <sup>289</sup> Carers' acceptance of patients' decision was influenced by the perception of  
16  
17 conservative management as a non-invasive treatment, the advanced age of the  
18  
19 patient, and the lack of benefit received from haemodialysis.<sup>62 126 132 159</sup> Although  
20  
21 family members were often uncomfortable about making end-of-life decisions, they  
22  
23 tended to recognise it was important to respect the patient's wishes.<sup>199 230 287</sup> Figure  
24  
25  
26  
27  
28  
29  
30  
31  
32  
33  
34  
35  
36  
37  
38  
39  
40  
41  
42  
43  
44  
45  
46  
47  
48  
49  
50  
51  
52  
53  
54  
55  
56  
57  
58  
59  
60

## DISCUSSION

Our findings demonstrate that the work and capacity of patients and carers are highly unstable situational factors that make up the BoT. Capacity is particularly diminished by socioeconomic factors, which ultimately exacerbates the work of patients and their carers; this may occur even in regions with universal health coverage. Particularly in LMICs, patients are often under-insured or not at all, which makes it almost impossible for them to attain life-saving treatments. Patients can be caught in a vicious cycle whereby they lose their job and health insurance because of ill health or because they need time off from work to attend dialysis, leading to exacerbations in disease, lack of financial access to treatment, and difficulty obtaining a job because of poor health. Patients often fear catastrophic

1  
2  
3 1 consequences due to a lack of financial capacity, and make strenuous efforts to  
4  
5 2 prevent them. Thematic syntheses with robust methods have covered different  
6  
7 3 aspects of being a patient with CKD.<sup>290-303</sup> Here, we focused on three elements of  
8  
9  
10 4 BoT, namely workload, capacity and experienced control, to develop an  
11  
12 5 understanding of the BoT of CKD including the experiences of patients in contexts of  
13  
14 6 structural inequalities.

15  
16  
17  
18  
19 8 Worldwide, many individuals with CKD receive no treatment or receive only  
20  
21 9 fragmented care.<sup>6 33 304-309</sup> Millions of preventable deaths occur because of lack of  
22  
23 10 access to RRT.<sup>7</sup> Moreover, in some LMICs with universal health coverage, resources  
24  
25 11 may be limited because of geography or poor infrastructure; in such cases, the use of  
26  
27 12 free health providers can create delays that compromise the treatment itself,  
28  
29 13 resulting in patients struggling to pay for private providers. When this occurs,  
30  
31 14 healthcare becomes fragmented and uncoordinated. Even in some modern welfare  
32  
33 15 states, health inequalities persist, particularly affecting minorities, those who are  
34  
35 16 unemployed, or undocumented.<sup>310</sup> One example is the use of emergency  
36  
37 17 haemodialysis by undocumented and uninsured immigrants with CKD.<sup>50</sup> Several  
38  
39 18 studies have highlighted the imperative necessity to address this disturbing  
40  
41 19 reality.<sup>311-318</sup>

42  
43  
44  
45  
46  
47  
48  
49 21 When health systems fail to meet patients' treatment needs, patients mobilise  
50  
51 22 resources and develop coping strategies such as accepting charity or selling assets.<sup>11</sup>

52  
53 23 <sup>27 307</sup> This distressing scenario adds to their workload and very easily overwhelms  
54  
55 24 patients' capacity. Transportation to and from dialysis centres is a frequent

1  
2  
3 challenge, it is time-consuming, costly, or simply not available. Those patients living  
4  
5 in non-urban areas in countries where home dialysis is not available have to travel  
6  
7 long distances or relocate to access treatment; some may be faced with the decision  
8  
9 of leaving their young children in the care of others for long periods of time. On the  
10  
11 other hand, in countries with robust health coverage, patients may feel  
12  
13  
14 overwhelmed even by having to travel short distances to the treatment centre every  
15  
16 two days, especially if they do not have support or, if offered home dialysis, they  
17  
18 may experience social isolation, unexpected costs, and lack of sufficient technical  
19  
20 assistance.  
21  
22

23  
24  
25  
26 Support from social networks, professionals, and other patients is critical in  
27  
28 improving patient's capacity. Spirituality and church communities are significant  
29  
30 resources for coping with illness and its treatment, as seen in several studies.<sup>19 249 250</sup>  
31  
32  
33 <sup>319-323</sup> However, social support is not guaranteed; in some cultures, patients perceive  
34  
35 lack of support by their own networks caused by discrimination because of their  
36  
37 illness, leading to intolerable levels of BoT.<sup>42 58 244 252</sup> It has also been shown that  
38  
39 informal care offered by family, friends or neighbours can burden patients through  
40  
41 uncomfortable feelings of dependency or the obligation to have an optimistic  
42  
43 attitude toward their condition.<sup>324</sup> Our findings support this view; patients often fear  
44  
45 becoming a burden on their families, which affects their decisions related to  
46  
47 treatment options.  
48  
49  
50

51  
52  
53 We confirmed that patients' capacity can be undermined by insufficient or  
54  
55 inadequate information. Deficits in communication between patients and  
56  
57

1 professionals are endemic and rooted in structural and system factors.<sup>18 28 291 303 325</sup>  
2  
3 This shortfall affects decisions regarding dialysis modality, medication management,  
4  
5 and the possibility of utilising a living donation. Patient discussions with professionals  
6  
7 must result in a collaborative partnership and should not simply provide  
8  
9 information.<sup>324</sup> For example, patients' concerns and expectations about waitlists,  
10  
11 eligibility, and allocation for transplantation could be addressed via additional  
12  
13 information, clinical conversations, and access to specialised psychological  
14  
15 therapists.<sup>301</sup>  
16  
17  
18  
19  
20  
21  
22

23 Our findings confirm that among immigrant populations, language, cultural, and  
24  
25 religious differences can act as barriers to healthcare and contribute to BoT;  
26  
27 culturally competent community navigator programs could play an essential role in  
28  
29 improving healthcare disparities.<sup>326</sup> Surprisingly, patients who undergo haemodialysis  
30  
31 tend to perceive that staff underestimate their capacities.<sup>56 92 99 199-201</sup> When  
32  
33 healthcare professionals do not take into consideration patients' knowledge or  
34  
35 values, a diminished participation in self-care and relationally induced non-  
36  
37 adherence can occur. Treatment plans should be discussed against an assessment of  
38  
39 patient and caregiver capacity, as well as their material, social, and cognitive  
40  
41 resources.<sup>26 327</sup>  
42  
43  
44  
45  
46  
47  
48  
49

50 Challenged by constraints, a patient's sense of control can become fragile. As seen in  
51  
52 our review, patients often employ a range of strategies to retain their control, such  
53  
54 as withholding clinical information from professionals, asking for additional tests, or  
55  
56 modifying their treatment. Although a patient's capacity to cope with BoT is often  
57  
58  
59  
60

1  
2  
3 exceeded, healthcare systems increasingly delegate responsibilities to patients and  
4  
5 carers, focusing on self-management and compliance.<sup>28 328</sup> When overwhelmed,  
6  
7 patients may be forced to renegotiate their responsibilities with actors in the health  
8  
9 system and their own social networks.<sup>27</sup>  
10

11  
12  
13  
14 Our review has important limitations. The variety of methodologies, quality of  
15  
16 reporting, and heterogeneity of perspectives make synthesis difficult. Only studies  
17  
18 that included face-to-face interviews were included to capture rich qualitative data,  
19  
20 and studies that reported methods such as telephone and postal questionnaires or  
21  
22 surveys were excluded. Studies with paediatric patients and/or their carers were  
23  
24 excluded, as BoT may significantly differ. Although the use of framework analysis can  
25  
26 improve the transparency of coding and identify underlying assumptions, it can also  
27  
28 be interpreted as a limitation because findings may be influenced by and connected  
29  
30 to these theories. For a more global perspective, studies published in other  
31  
32 languages could have been included. Grey literature was excluded to manage the  
33  
34 scope of the review. We analysed data with a coding framework supported by  
35  
36 middle-range theories to understand the work involved in being a person with CKD  
37  
38 and how practises are organised and integrated into social contexts. The major  
39  
40 strengths of this study are the comprehensive inclusion of publications in the English,  
41  
42 Spanish, and Portuguese languages to understand the experience of patients in  
43  
44 LMICs, which may enhance the transferability of our findings, the broad description  
45  
46 of BoT across all stages of CKD, and the use of theories to underpin our findings.  
47  
48  
49  
50  
51  
52  
53  
54

## 55 **CONCLUSION**

56  
57  
58  
59  
60



1  
2  
3 1 To the best of our knowledge, this is the first theory-led review that focuses on the  
4  
5 2 structural inequalities that shape patient and caregivers' experiences related to BoT  
6  
7 3 in CKD. The inclusion of LMICs extends our understanding of the experiences of  
8  
9 4 individuals living in these countries and the work they undertake to manage their  
10  
11 5 conditions. CKD can result in invasive and exhausting BoT, which is exacerbated in  
12  
13 6 contexts of limited health coverage, socioeconomic disadvantages, and marked  
14  
15 7 imbalances in power. An urgent, collaborative, multipronged approach is needed to  
16  
17 8 address the overwhelming BoT of CKD that, in many populations, results in  
18  
19 9 premature death.<sup>6 307</sup> The design of innovative policies, interventions, and activities  
20  
21 10 are warranted to support and empower patients, considering the constraints and  
22  
23 11 structure of systems that patients navigate in their disease trajectory. This will lead  
24  
25 12 to a better understand of their burden, with the objective of improving quality of  
26  
27 13 care and the illness experience.  
28  
29  
30  
31  
32  
33  
34

### 35 **ABBREVIATIONS**

36  
37 16 BoT, burden of treatment; CKD, chronic kidney disease; LMIC, low- and middle-  
38  
39 17 income countries.  
40  
41  
42  
43

### 44 **DECLARATIONS**

#### 45 **Ethics approval and consent to participate**

46  
47 20 Not applicable  
48  
49  
50  
51  
52

#### 53 **Consent to publish**

54  
55 24 Not applicable  
56  
57  
58  
59  
60

## Availability of data and material

EXPERTS1 Protocol is published in BMJ Open, with open access

May CR, Masters J, Welch L, Hunt K, Pope C, Myall M, Griffiths P, Roderick P, Glanville J, Richardson A: **EXPERTS 1—experiences of long-term life-limiting conditions among patients and carers: protocol for a qualitative meta-synthesis and conceptual modelling study.** *BMJ open* 2015, **5**(4):e007372.

Meta-review of systematic reviews is published in BMJ Open, with open access

May CR, Cummings A, Myall M, Harvey J, Pope C, Griffiths P, Roderick P, Arber M, Boehmer K, Mair FS *et al*: **Experiences of long-term life-limiting conditions among patients and carers: what can we learn from a meta-review of systematic reviews of qualitative studies of chronic heart failure, chronic obstructive pulmonary disease and chronic kidney disease?** *BMJ Open* 2016, **6**(10):e011694.

Search strategy is included as supplementary file.

## Competing interests

The authors declare that they have no competing interests.

## Funding

The first stages of this project (EXPERTS1 Protocol, search strategy and meta review) were partially funded by the National Institute for Health Research Collaboration for Leadership in Applied Health Research and Care (NIHR CLAHRC) Wessex which is a partnership between Wessex NHS organizations and partners and the University of Southampton. The views expressed are those of the author(s) and not necessarily

1  
2  
3 1 those of the NHS, the NIHR or the Department of Health. Funders had no role in  
4  
5 2 study design, data collection and analysis, decision to publish, or preparation of the  
6  
7 3 manuscript.  
8  
9

10 4  
11  
12 5 **Authors' contributions**

13  
14 6 JR drafted the paper. AC, MM, CRM, JH screened titles and abstracts in first search  
15  
16 7 round. Full papers were screened by JH, KL, MM, KH and AC. JR performed database  
17  
18 8 searches for update and extension of search. JR, JPA and FC screened updated  
19  
20 9 results. JR, CRM and JPA performed content analysis. CRM, MM, AC, JPA critically  
21  
22 10 reviewed the manuscript for important intellectual content; all authors approved the  
23  
24 11 final version of the paper.  
25  
26  
27  
28  
29

30 12  
31 13 **Acknowledgment:**

32 14 Original search strategy developed with the systematic reviews group of the York  
33  
34 15 Health Economics Consortium (YHEC).  
35  
36  
37  
38  
39  
40  
41  
42  
43  
44  
45 16  
46  
47  
48  
49  
50  
51  
52  
53  
54  
55  
56  
57  
58  
59  
60

1

2

**Table 1. PICO criteria for including studies**

---

|                      |                                                                                           |
|----------------------|-------------------------------------------------------------------------------------------|
| <b>Population:</b>   | Patients of at least 18 years of age, diagnosed with CKD, and formal and informal carers  |
| <b>Intervention:</b> | Experiences of healthcare provision, any type of treatment for CKD.                       |
| <b>Comparator:</b>   | Not limited to comparator studies;                                                        |
| <b>Outcomes:</b>     | Qualitative data on patients and carers' experiences of care for those patients with CKD. |
| <b>Study type:</b>   | Primary studies, qualitative or mixed methods studies.                                    |
| <b>Time:</b>         | From 2000 to present.                                                                     |

---

3

4

5

6

1  
2  
3  
4  
5  
6  
7  
8  
9  
10  
11  
12  
13  
14  
15  
16  
17  
18  
19  
20  
21  
22  
23  
24  
25  
26  
27  
28  
29  
30  
31  
32  
33  
34  
35  
36  
37  
38  
39  
40  
41  
42  
43  
44  
45  
46  
47

**Table 2:** Characteristics of included studies

| Author                       | Year | Country        | Patients | Carers | Data collection                       | Data analysis reported                   |
|------------------------------|------|----------------|----------|--------|---------------------------------------|------------------------------------------|
| Aasen <sup>105</sup>         | 2012 | Norway         | 11       |        | Interviews                            | Critical discourse analysis              |
| Aasen <sup>256</sup>         | 2012 | Norway         |          | 7      | Interviews                            | Critical discourse analysis              |
| Al-Arabi <sup>102</sup>      | 2006 | United States  | 80       |        | Interviews                            | Naturalistic inquiry, thematic analysis  |
| Allen <sup>171</sup>         | 2011 | Canada         | 7        |        | Ethnographic observations, interviews | Participatory action, thematic analysis  |
| Allen <sup>62</sup>          | 2015 | Canada         | 6        | 11     | Ethnographic observations, interviews | Thematic analysis                        |
| Anderson <sup>51</sup>       | 2012 | Australia      | 241      |        | Interviews                            | Thematic analysis                        |
| Anderson <sup>75</sup>       | 2008 | Australia      | 241      |        | Interviews                            | Thematic analysis                        |
| Arslan <sup>198</sup>        | 2009 | Turkey         | 10       |        | Interviews                            | Content analysis                         |
| Ashby <sup>36</sup>          | 2005 | Australia      | 16       |        | Interviews                            | Grounded theory                          |
| Avril-Sephula <sup>116</sup> | 2014 | United Kingdom | 8        |        | Interviews                            | Thematic analysis                        |
| Axelsson <sup>132</sup>      | 2015 | Sweden         |          | 14     | Interviews                            | Content analysis                         |
| Axelsson <sup>185</sup>      | 2012 | Sweden         | 8        |        | Interviews                            | Phenomenological, hermeneutical analysis |
| Bailey <sup>232</sup>        | 2015 | United Kingdom | 32       |        | Interviews                            | Constant comparison                      |
| Bailey <sup>37</sup>         | 2016 | United Kingdom | 13       |        | Interviews                            | Constant comparison                      |
| Baillie <sup>154</sup>       | 2015 | United Kingdom | 16       | 9      | Interviews                            | Thematic analysis                        |
| Baillie <sup>155</sup>       | 2015 | United Kingdom | 16       | 9      | Interviews                            | Thematic analysis                        |
| Barbosa <sup>143</sup>       | 2009 | Brazil         | 10       |        | Interviews                            | Grounded theory                          |
| Bath <sup>243</sup>          | 2003 | United Kingdom | 10       |        | Interviews                            | Phenomenological analysis                |

| Author                           | Year | Country        | Patients | Carers | Data collection                     | Data analysis reported                   |
|----------------------------------|------|----------------|----------|--------|-------------------------------------|------------------------------------------|
| Beanlands <sup>207</sup>         | 2005 | Canada         |          | 37     | Interviews                          | Grounded theory                          |
| Bennett <sup>195</sup>           | 2013 | Australia      | 9        | 2      | Interviews facilitated by images    | Thematic analysis                        |
| Blogg <sup>67</sup>              | 2008 | Australia      |          | 5      | Interviews                          | Ethnographic analysis                    |
| Boaz <sup>173</sup>              | 2014 | United Kingdom | 25       |        | Interviews                          | Constant comparison                      |
| Bourbonnais <sup>103</sup>       | 2012 | United States  | 25       |        | Interviews                          | Content analysis                         |
| Bridger <sup>235</sup>           | 2009 | United Kingdom | 23       |        | Interviews, drawings, journals      | Grounded theory                          |
| Bristowe <sup>124</sup>          | 2015 | United Kingdom | 20       |        | Interviews                          | Thematic analysis                        |
| Brito-Ashurst, de <sup>119</sup> | 2011 | United Kingdom | 20       |        | Focus groups, vignettes and diaries | Thematic analysis                        |
| Browne <sup>223</sup>            | 2016 | United States  | 40       |        | Focus groups                        | Content analysis                         |
| Buldukoglu <sup>184</sup>        | 2005 | Turkey         | 40       |        | Open ended questions                | Constant comparison                      |
| Burnette <sup>76</sup>           | 2009 | Australia      | 6        |        | Interviews                          | Thematic analysis                        |
| Cadena <sup>152</sup>            | 2015 | Mexico         | 5        |        | Interviews                          | Interpretative phenomenological analysis |
| Calvey <sup>144</sup>            | 2011 | Ireland        | 7        |        | Interviews                          | Colaizzi's method                        |
| Calvin <sup>255</sup>            | 2004 | United States  | 12       |        | Interviews                          | Constant comparison                      |
| Calvin <sup>287</sup>            | 2014 | United States  | 18       |        | Interviews                          | Interpretative, Glaserian approach       |
| Campos <sup>231</sup>            | 2003 | Brazil         | 7        |        | Interviews                          | Thematic analysis                        |
| Campos <sup>85</sup>             | 2010 | Brazil         | 7        |        | Interviews                          | Thematic analysis                        |
| Campos <sup>86</sup>             | 2015 | Brazil         | 23       |        | interviews                          | Content analysis                         |
| Cases <sup>275</sup>             | 2011 | United Kingdom | 6        |        | Interviews                          | Phenomenological analysis                |
| Cervantes <sup>50</sup>          | 2017 | United States  | 20       |        | Interviews                          | Thematic analysis                        |

1  
2  
3  
4  
5  
6  
7  
8  
9  
10  
11  
12  
13  
14  
15  
16  
17  
18  
19  
20  
21  
22  
23  
24  
25  
26  
27  
28  
29  
30  
31  
32  
33  
34  
35  
36  
37  
38  
39  
40  
41  
42  
43  
44  
45  
46  
47

| Author                       | Year | Country         | Patients | Carers | Data collection | Data analysis reported                  |
|------------------------------|------|-----------------|----------|--------|-----------------|-----------------------------------------|
| Chatrung <sup>186</sup>      | 2015 | Thailand        | 8        |        | Interviews      | Thematic analysis                       |
| Chenitz <sup>84</sup>        | 2014 | United States   | 30       |        | Interviews      | Grounded theory                         |
| Chiaranai <sup>38</sup>      | 2016 | Thailand        | 26       |        | Interviews      | Thematic analysis                       |
| Cho <sup>39</sup>            | 2016 | Korea           | 5        |        | Interviews      | Colaizzi's method                       |
| Chong <sup>162</sup>         | 2016 | Korea           | 8        |        | Interviews      | Content analysis                        |
| Clarkson <sup>104</sup>      | 2010 | United States   | 10       |        | Interviews      | Thematic analysis                       |
| Costa <sup>196</sup>         | 2014 | Brazil          | 26       |        | Interviews      | Lexical analysis                        |
| Costantini <sup>90</sup>     | 2008 | Canada          | 14       |        | Interviews      | Content analysis                        |
| Cox <sup>146</sup>           | 2016 | United States   | 50       |        | Interviews      | Interpretive description                |
| Cramm <sup>216</sup>         | 2015 | The Netherlands | 15       | 12     | Interviews      | Factor analysis, Q methodology          |
| Cristóvão <sup>111</sup>     | 2013 | Portugal        | 20       |        | Interviews      | Thematic analysis                       |
| Crowley-Matoka <sup>81</sup> | 2005 | Mexico          | 50       |        | Interviews      | NA                                      |
| Curtin <sup>259</sup>        | 2002 | United States   | 18       |        | Interviews      | Content analysis                        |
| Curtin <sup>260</sup>        | 2001 | United States   | 18       |        | Interviews      | Content analysis                        |
| da Silva <sup>101</sup>      | 2016 | Brazil          | 30       |        | Interviews      | Content and thematic analysis           |
| da Silva <sup>329</sup>      | 2011 | Brazil          | 9        |        | Interviews      | Qualitative analysis                    |
| Darrell <sup>277</sup>       | 2016 | United States   | 12       |        | Interviews      | Giorgi's method                         |
| Davison <sup>228</sup>       | 2006 | Canada          | 24       |        | Interviews      | Constant comparison, iterative analysis |
| Davison <sup>286</sup>       | 2006 | Canada          | 19       |        | Interviews      | inductive analysis                      |
| de Brito <sup>87</sup>       | 2015 | Brazil          | 50       |        | Interviews      | Collective subject technique            |

| Author                      | Year | Country         | Patients | Carers | Data collection             | Data analysis reported       |
|-----------------------------|------|-----------------|----------|--------|-----------------------------|------------------------------|
| de Rosenroll <sup>273</sup> | 2013 | Canada          |          | 10     | Interviews                  | Constant comparison          |
| Dekkers <sup>40</sup>       | 2005 | The Netherlands | 7        |        | Interviews                  | Phenomenological analysis    |
| DePasquale <sup>218</sup>   | 2013 | United States   | 68       | 62     | Group interviews            | Mixed method                 |
| dos Reis <sup>153</sup>     | 2008 | Brazil          | 8        |        | Interviews                  | Content analysis             |
| dos Santos <sup>160</sup>   | 2011 | Brazil          | 8        |        | Interviews                  | Grounded theory              |
| dos Santos <sup>252</sup>   | 2015 | Brazil          | 20       |        | Interviews                  | Critical incident analysis   |
| Ekelund <sup>41</sup>       | 2010 | Sweden          | 39       | 21     | Interviews                  | Content analysis             |
| Erlang <sup>200</sup>       | 2015 | Denmark         | 9        |        | Interviews                  | Systematic text condensation |
| Eslami <sup>211</sup>       | 2016 | Iran            |          | 20     | Interviews                  | Thematic analysis            |
| Finnegan-John <sup>88</sup> | 2013 | United Kingdom  | 118      | 12     | Interviews and focus groups | Thematic analysis            |
| Flores <sup>163</sup>       | 2004 | Brazil          | 9        |        | Interviews                  | Content analysis             |
| Fraguas <sup>35</sup>       | 2008 | Brazil          |          | 18     | Interviews                  | Content analysis             |
| Ghadami <sup>236</sup>      | 2012 | Iran            | 15       |        | Interviews                  | Content analysis             |
| Giles <sup>157</sup>        | 2003 | Canada          | 4        |        | Interviews                  | Thematic analysis            |
| Giles <sup>158</sup>        | 2005 | Canada          |          |        | Interviews                  | Phenomenological analysis    |
| Goff <sup>283</sup>         | 2015 | United States   | 13       | 9      | Interviews                  | Thematic analysis            |
| Goldane <sup>174</sup>      | 2011 | United States   | 39       |        | Focus groups and interviews | Iterative analysis           |
| Gordon <sup>178</sup>       | 2007 | United States   | 20       |        | Diary entries               | Thematic analysis            |
| Gordon <sup>82</sup>        | 2009 | United States   | 82       |        | Interviews                  | Thematic analysis            |
| Gricio <sup>112</sup>       | 2009 | Brazil          | 20       |        | Interviews                  | Thematic analysis            |



1  
2  
3  
4  
5  
6  
7  
8  
9  
10  
11  
12  
13  
14  
15  
16  
17  
18  
19  
20  
21  
22  
23  
24  
25  
26  
27  
28  
29  
30  
31  
32  
33  
34  
35  
36  
37  
38  
39  
40  
41  
42  
43  
44  
45  
46  
47

| Author                     | Year | Country        | Patients | Carers | Data collection               | Data analysis reported     |
|----------------------------|------|----------------|----------|--------|-------------------------------|----------------------------|
| Gullick <sup>330</sup>     | 2016 | Australia      | 11       | 5      | Interviews                    | Hermeneutic interpretation |
| Hagren <sup>113</sup>      | 2005 | Sweden         | 41       |        | Interviews                    | Content analysis           |
| Hagren <sup>278</sup>      | 2001 | Sweden         | 15       |        | Interviews                    | Content analysis           |
| Hain <sup>187</sup>        | 2011 | United States  | 56       |        | Interviews                    | Story inquiry method       |
| Hanson <sup>68</sup>       | 2016 | Australia      | 20       |        | Interviews                    | Thematic analysis          |
| Harrington <sup>279</sup>  | 2016 | United Kingdom | 24       |        | Interviews                    | Thematic analysis          |
| Harwood <sup>265</sup>     | 2014 | Canada         | 13       |        | Interviews                    | Content analysis           |
| Harwood <sup>271</sup>     | 2005 | United Kingdom | 11       |        | Interviews                    | Content analysis           |
| Haspeslagh <sup>237</sup>  | 2013 | Belgium        | 31       |        | Interviews and questionnaires | Thematic analysis          |
| Heiwe <sup>135</sup>       | 2003 | Sweden         | 16       |        | Interviews                    | Contextual analysis        |
| Heiwe <sup>138</sup>       | 2004 | Sweden         | 16       |        | Interviews                    | Contextual analysis        |
| Herbias <sup>114</sup>     | 2016 | Chile          | 12       |        | Interviews                    | Streubert's method         |
| Herlin <sup>280</sup>      | 2010 | Sweden         | 9        |        | Interviews                    | Giorgi's method            |
| Hollingdale <sup>224</sup> | 2008 | United Kingdom | 20       |        | Focus groups                  | Framework approach         |
| Hong <sup>118</sup>        | 2017 | Singapore      | 14       |        | Interviews                    | Thematic analysis          |
| Horigan <sup>136</sup>     | 2013 | United States  | 14       |        | Interviews                    | Content analysis           |
| Hutchison <sup>285</sup>   | 2017 | Canada         | 9        | 16     | Interviews                    | Interpretive description   |
| Iles-Smith <sup>229</sup>  | 2005 | United Kingdom | 10       |        | Interviews                    | Thematic analysis          |
| Johnston <sup>126</sup>    | 2012 | United Kingdom | 9        |        | Interviews                    | Thematic analysis          |
| Kaba <sup>331</sup>        | 2007 | Greece         | 23       |        | Interviews                    | Qualitative analysis       |

| Author                        | Year | Country        | Patients | Carers | Data collection          | Data analysis reported                     |
|-------------------------------|------|----------------|----------|--------|--------------------------|--------------------------------------------|
| Kahn <sup>33</sup>            | 2015 | United States  | 34       |        | Interviews               | Thematic analysis                          |
| Karamanidou <sup>13</sup>     | 2014 | United Kingdom | 7        |        | Interviews               | Interpretative and phenomenologic analysis |
| Kazley <sup>42</sup>          | 2015 | United States  | 20       |        | focus groups             | Thematic analysis                          |
| Keeping <sup>71</sup>         | 2001 | Canada         | 8        |        | Interviews               | Thematic analysis                          |
| Kierans <sup>164</sup>        | 2005 | Ireland        | 5        |        | Interviews               | Phenomenological analysis                  |
| Kierans <sup>165</sup>        | 2001 | Ireland        | 5        |        | Interviews, life stories | Phenomenological analysis                  |
| King <sup>89</sup>            | 2002 | United Kingdom | 22       |        | Interviews               | Template approach                          |
| Knihs <sup>166</sup>          | 2013 | Brazil         | 20       |        | Interviews               | Content analysis                           |
| Krespi-Boothby <sup>145</sup> | 2004 | United Kingdom | 16       |        | Interviews               | Thematic analysis                          |
| Krespi-Boothby <sup>149</sup> | 2013 | United Kingdom | 16       |        | Interviews               | Template approach                          |
| Ladin <sup>199</sup>          | 2016 | United States  | 23       |        | Interviews               | Thematic analysis                          |
| Ladin <sup>264</sup>          | 2017 | United States  | 31       |        | Interviews               | Thematic analysis Nutbeam's framework      |
| Landreneau <sup>269</sup>     | 2006 | United States  | 6        |        | Interviews               | Colaizzi's method                          |
| Landreneau <sup>274</sup>     | 2007 | United States  | 12       |        | Interviews               | Colaizzi's method                          |
| Lawrence <sup>167</sup>       | 2013 | United Kingdom | 10       |        | Interviews               | Conceptual and categorical analysis        |
| Lederer <sup>261</sup>        | 2015 | United States  | 32       |        | Interviews               | Thematic analysis                          |
| Lee <sup>220</sup>            | 2008 | Denmark        | 27       | 18     | Focus groups             | Thematic analysis                          |
| Lee <sup>43</sup>             | 2016 | Singapore      |          | 20     | Interviews               | Thematic analysis                          |
| Lenci <sup>248</sup>          | 2012 | United States  | 4        |        | Interviews               | Thematic analysis                          |
| Leung <sup>179</sup>          | 2007 | Hong Kong      | 12       |        | Interviews               | Content analysis                           |

1  
2  
3  
4  
5  
6  
7  
8  
9  
10  
11  
12  
13  
14  
15  
16  
17  
18  
19  
20  
21  
22  
23  
24  
25  
26  
27  
28  
29  
30  
31  
32  
33  
34  
35  
36  
37  
38  
39  
40  
41  
42  
43  
44  
45  
46  
47

| Author                         | Year | Country         | Patients | Carers | Data collection             | Data analysis reported  |
|--------------------------------|------|-----------------|----------|--------|-----------------------------|-------------------------|
| Lewis <sup>281</sup>           | 2015 | United Kingdom  | 40       |        | Interviews                  | Grounded theory         |
| Lin <sup>188</sup>             | 2015 | Taiwan          | 15       |        | Interviews                  | Constant comparison     |
| Lindberg <sup>257</sup>        | 2013 | Sweden          | 10       |        | Interviews                  | Content analysis        |
| Lindberg <sup>44</sup>         | 2008 | Sweden          | 10       |        | Interviews                  | Content analysis        |
| Lindsay <sup>276</sup>         | 2014 | Australia       | 7        |        | Interviews                  | Thematic analysis       |
| Llewellyn <sup>266</sup>       | 2014 | United Kingdom  | 19       |        | Interviews                  | Thematic analysis       |
| Lo <sup>127</sup>              | 2016 | Australia       | 58       |        | Interviews and focus groups | Thematic analysis       |
| Lopes <sup>168</sup>           | 2014 | Brazil          | 12       |        | Interviews                  | Interpretative analysis |
| Lopez-Vargas <sup>91</sup>     | 2016 | Australia       | 38       |        | Focus groups                | Thematic analysis       |
| Lopez-Vargas <sup>92</sup>     | 2014 | Australia       | 38       |        | Focus groups                | Thematic analysis       |
| Lovink <sup>214</sup>          | 2015 | The Netherlands | 12       |        | Interviews                  | Content analysis        |
| Low <sup>159</sup>             | 2014 | United Kingdom  |          | 26     | Interviews                  | Thematic analysis       |
| Machado <sup>147</sup>         | 2003 | Brazil          | 18       |        | Interviews                  | Discourse analysis      |
| Marques <sup>225</sup>         | 2014 | Brazil          |          | 10     | Interviews                  | Content analysis        |
| Martin-McDonald <sup>192</sup> | 2003 | Australia       | 10       |        | Interviews                  | Thematic analysis       |
| Martin-McDonald <sup>193</sup> | 2003 | Australia       | 10       |        | Interviews                  | Thematic analysis       |
| Mason <sup>93</sup>            | 2007 | United Kingdom  | 9        | 5      | Focus groups                | Framework approach      |
| McCarthy <sup>161</sup>        | 2010 | Australia       | 5        |        | Interviews                  | Sequential analysis     |
| McKillop <sup>262</sup>        | 2013 | United Kingdom  | 10       |        | Interviews                  | Thematic analysis       |
| Mercado-Martínez <sup>45</sup> | 2015 | Mexico          | 37       | 50     | Interviews                  | Content analysis        |

| Author                           | Year | Country        | Patients | Carers | Data collection | Data analysis reported             |
|----------------------------------|------|----------------|----------|--------|-----------------|------------------------------------|
| Mercado-Martínez <sup>47</sup>   | 2014 | Mexico         | 21       |        | Interviews      | Thematic analysis                  |
| Mercado-Martínez <sup>46</sup>   | 2015 | Brazil         | 11       | 5      | Interviews      | Content analysis                   |
| Mitchell <sup>202</sup>          | 2009 | United Kingdom | 10       |        | Interviews      | Content analysis                   |
| Molzahn <sup>289</sup>           | 2012 | United States  | 14       |        | Interviews      | Thematic analysis                  |
| Moran <sup>131</sup>             | 2011 | Ireland        | 16       |        | Interviews      | Interpretative analysis            |
| Moran <sup>201</sup>             | 2009 | Australia      | 16       |        | Interviews      | Interpretive analysis              |
| Moran <sup>148</sup>             | 2009 | Australia      | 16       |        | Interviews      | Interpretive analysis              |
| Morton <sup>77</sup>             | 2010 | Australia      | 95       |        | Interviews      | Thematic analysis                  |
| Muduma <sup>94</sup>             | 2016 | France         | 37       |        | Focus groups    | Qualitative analysis               |
| Nagpal <sup>215</sup>            | 2017 | United States  | 36       |        | Interviews      | Coding                             |
| Namiki <sup>217</sup>            | 2010 | Australia      | 4        |        | Interviews      | Thematic analysis                  |
| Niu <sup>194</sup>               | 2017 | China          | 23       |        | Interviews      | Continuous comparison analysis     |
| Nobahar <sup>65</sup>            | 2016 | Iran           | 8        | 12     | Interviews      | Graneheim Lundman content analysis |
| Nobahar <sup>66</sup>            | 2016 | Iran           | 8        | 12     | Interviews      | Granheim and Lundman's approach    |
| Noble <sup>95</sup>              | 2012 | United Kingdom |          | 19     | Interviews      | Constant comparison                |
| Noble <sup>96</sup>              | 2010 | United Kingdom | 30       | 17     | Interviews      | Constant comparison                |
| Noble <sup>288</sup>             | 2009 | United Kingdom | 30       | 17     | Interviews      | Constant comparison                |
| Nygaardh <sup>284</sup>          | 2011 | Sweden         |          | 12     | Interviews      | Content analysis                   |
| Nygaardh <sup>233</sup>          | 2011 | Sweden         | 20       |        | Interviews      | Latent content analysis            |
| Malheiro Oliveira <sup>206</sup> | 2012 | Brazil         | 19       |        | Interviews      | Categorical analysis               |

1  
2  
3  
4  
5  
6  
7  
8  
9  
10  
11  
12  
13  
14  
15  
16  
17  
18  
19  
20  
21  
22  
23  
24  
25  
26  
27  
28  
29  
30  
31  
32  
33  
34  
35  
36  
37  
38  
39  
40  
41  
42  
43  
44  
45  
46  
47

| Author                           | Year | Country        | Patients | Carers | Data collection | Data analysis reported               |
|----------------------------------|------|----------------|----------|--------|-----------------|--------------------------------------|
| Orr <sup>180</sup>               | 2007 | United Kingdom | 26       |        | Focus groups    | Thematic analysis                    |
| Orr <sup>181</sup>               | 2007 | United Kingdom | 26       |        | Focus groups    | Thematic analysis                    |
| Oyegbile <sup>63</sup>           | 2016 | Nigeria        |          | 15     | Interviews      | Content analysis                     |
| Pelletier-Hibbert <sup>282</sup> | 2001 | Canada         |          | 41     | Focus groups    | Thematic analysis                    |
| Piccoli <sup>221</sup>           | 2010 | Italy          | 12       |        | Focus groups    | Not clear                            |
| Petrovski <sup>205</sup>         | 2006 | Brazil         | 15       |        | Interviews      | Content analysis                     |
| Pilger <sup>222</sup>            | 2010 | Brazil         | 22       |        | Interviews      | Thematic analysis                    |
| Polaschek <sup>52</sup>          | 2003 | New Zealand    | 6        |        | Interviews      | Thematic analysis                    |
| Polaschek <sup>53</sup>          | 2006 | New Zealand    | 20       |        | Interviews      | Thematic analysis                    |
| Polaschek <sup>54</sup>          | 2007 | New Zealand    | 20       |        | Interviews      | Thematic analysis                    |
| Prieto <sup>128</sup>            | 2011 | Spain          | 22       |        | Interviews      | Discourse analysis                   |
| Rabiei <sup>139</sup>            | 2015 | Iran           |          | 20     | Interviews      | Thematic analysis                    |
| Ravenscroft <sup>253</sup>       | 2005 | Canada         | 7        |        | Interviews      | Inductive analysis                   |
| Reid <sup>263</sup>              | 2012 | United Kingdom | 11       |        | Interviews      | Thematic analysis                    |
| Reta <sup>129</sup>              | 2014 | Spain          | 14       |        | Interviews      | Content analysis                     |
| Richard <sup>106</sup>           | 2010 | United States  | 14       |        | Interviews      | Cultural negotiation model framework |
| Rifkin <sup>97</sup>             | 2010 | United States  | 20       |        | Interviews      | Thematic analysis                    |
| Rix <sup>55</sup>                | 2015 | Australia      | 18       | 29     | Interviews      | Thematic analysis                    |
| Rix <sup>56</sup>                | 2014 | Australia      | 18       |        | Interviews      | Thematic analysis                    |
| Rodrigues <sup>189</sup>         | 2011 | Brazil         | 8        |        | Interviews      | Categorical analysis                 |

| Author                      | Year | Country         | Patients | Carers | Data collection             | Data analysis reported                      |
|-----------------------------|------|-----------------|----------|--------|-----------------------------|---------------------------------------------|
| Ros <sup>241</sup>          | 2012 | United States   | 19       |        | Focus groups                | Thematic analysis                           |
| Roso <sup>117</sup>         | 2013 | Brazil          | 15       |        | Narrative interviews        | Thematic analysis                           |
| Russ <sup>226</sup>         | 2005 | United States   | 43       |        | Interviews                  | Anthropologic study                         |
| Russell <sup>238</sup>      | 2003 | United States   | 16       |        | Interviews                  | Constant comparison analysis                |
| Rygh <sup>69</sup>          | 2012 | Norway          | 11       |        | Interviews                  | Inductive, actor's point of view            |
| Sadala <sup>70</sup>        | 2012 | Brazil          | 19       |        | Narrative interviews        | Phenomenological and hermeneutical analysis |
| Sahaf <sup>219</sup>        | 2017 | Iran            | 9        |        | Interviews                  | Van Manem thematic analysis                 |
| Salvalaggio <sup>80</sup>   | 2003 | Canada          | 12       |        | Interviews                  | Immersion/crystalization analysis           |
| Schell <sup>267</sup>       | 2012 | United States   | 29       | 11     | Interviews and focus groups | Thematic analysis                           |
| Schipper <sup>182</sup>     | 2014 | The Netherlands | 30       |        | Focus groups and interviews | Thematic analysis                           |
| Schmid-Mohler <sup>83</sup> | 2014 | Switzerland     | 12       |        | Interviews                  | Content analysis                            |
| Schober <sup>203</sup>      | 2016 | United States   | 48       |        | Interviews                  | Thematic analysis                           |
| Seah <sup>48</sup>          | 2013 | Singapore       | 9        |        | Interviews                  | Interpretative phenomenological analysis    |
| Shahgholian <sup>140</sup>  | 2015 | Iran            | 17       |        | Interviews                  | Colaizzi's method                           |
| Shaw <sup>270</sup>         | 2015 | New Zealand     | 24       |        | Interviews                  | Phenomenological analysis                   |
| Sheu <sup>242</sup>         | 2012 | United States   | 27       | 23     | Focus groups                | Thematic analysis                           |
| Shih <sup>57</sup>          | 2011 | New Zealand     | 7        |        | Interviews                  | Hermeneutical and thematic analysis         |
| Shirazian <sup>121</sup>    | 2016 | United States   | 23       |        | focus groups                | Thematic analysis                           |
| Sieverdes <sup>172</sup>    | 2015 | United States   | 27       |        | focus groups                | Thematic analysis                           |
| Smith <sup>204</sup>        | 2010 | United States   | 19       |        | focus groups                | Content analysis                            |

| Author                      | Year | Country         | Patients | Carers | Data collection       | Data analysis reported          |
|-----------------------------|------|-----------------|----------|--------|-----------------------|---------------------------------|
| Spiers <sup>169</sup>       | 2016 | United Kingdom  | 10       |        | Interviews            | Thematic analysis               |
| Spiers <sup>175</sup>       | 2015 | United Kingdom  | 4        |        | Interviews            | Interpretative phenomenological |
| Stanfill <sup>176</sup>     | 2012 | United States   | 7        |        | Focus groups          | Iterative                       |
| Stewart <sup>79</sup>       | 2012 | United States   | 19       |        | Interviews            | Coding                          |
| Tanyi <sup>190</sup>        | 2008 | United States   | 16       |        | Interviews            | Colaizzi's method               |
| Tanyi <sup>191</sup>        | 2008 | United States   | 16       |        | Interviews            | Colaizzi's method               |
| Tavares <sup>213</sup>      | 2016 | Brazil          |          | 19     | Interviews and groups | Content analysis                |
| Taylor <sup>109</sup>       | 2016 | Australia       | 26       |        | Interviews            | Thematic analysis               |
| Taylor <sup>212</sup>       | 2015 | United Kingdom  | 15       | 11     | Interviews            | Constant comparison             |
| Theofilou <sup>120</sup>    | 2013 | Greece          | 10       |        | Interviews            | Phenomenological analysis       |
| Thomé <sup>244</sup>        | 2011 | Brazil          |          | 10     | Interviews            | Cultural analysis               |
| Tielen <sup>177</sup>       | 2011 | The Netherlands | 26       |        | Interviews            | Q methodology                   |
| Tijerina <sup>74</sup>      | 2006 | United States   | 26       |        | Interviews            | Coding                          |
| Tong <sup>234</sup>         | 2015 | Australia       | 15       |        | Interviews            | Thematic analysis               |
| Tong <sup>150</sup>         | 2013 | Italy           | 22       | 20     | Interviews            | Thematic analysis               |
| Tong <sup>61</sup>          | 2009 | Australia       | 63       |        | Focus groups          | Thematic analysis               |
| Tonkin-Crine <sup>125</sup> | 2015 | United Kingdom  | 42       |        | Interviews            | Thematic analysis               |
| Torchi <sup>151</sup>       | 2014 | Brazil          | 10       |        | Interviews            | Collective subject technique    |
| Tovazzi <sup>115</sup>      | 2012 | United States   | 12       |        | Interviews            | Phenomenological analysis       |
| Tweed <sup>107</sup>        | 2005 | United Kingdom  | 9        |        | Interviews            | Phenomenological analysis       |

| Author                    | Year | Country         | Patients | Carers | Data collection             | Data analysis reported    |
|---------------------------|------|-----------------|----------|--------|-----------------------------|---------------------------|
| Urstad <sup>239</sup>     | 2012 | Norway          | 15       |        | Interviews                  | Hermeneutic analysis      |
| Valsaraj <sup>58</sup>    | 2014 | India           | 10       |        | Interviews                  | Phenomenological analysis |
| Velez <sup>98</sup>       | 2006 | Spain           | 12       |        | Interviews                  | Thematic analysis         |
| Vestman <sup>258</sup>    | 2014 | Sweden          | 9        |        | Written narratives          | Thematic analysis         |
| Visser <sup>272</sup>     | 2009 | The Netherlands | 14       |        | Interviews                  | Thematic analysis         |
| Wachterman <sup>170</sup> | 2015 | United Kingdom  | 16       |        | Interviews                  | Thematic analysis         |
| Walker <sup>122</sup>     | 2012 | United Kingdom  | 9        |        | Interviews                  | Thematic analysis         |
| Walker <sup>49</sup>      | 2016 | New Zealand     | 43       | 9      | Interviews                  | Thematic analysis         |
| Walker <sup>59</sup>      | 2016 | New Zealand     | 43       | 9      | Interviews                  | Thematic analysis         |
| Walker <sup>78</sup>      | 2017 | New Zealand     | 13       |        | Interviews                  | Thematic analysis         |
| Walton <sup>249</sup>     | 2007 | United States   | 21       |        | Interviews                  | Grounded theory           |
| Walton <sup>251</sup>     | 2002 | United States   | 11       |        | Interviews                  | Grounded theory           |
| Weil <sup>245</sup>       | 2000 | United States   | 14       |        | Interviews                  | Thematic analysis         |
| Wells <sup>246</sup>      | 2015 | United States   | 17       | 17     | Interviews                  | Thematic analysis         |
| Wells <sup>60</sup>       | 2015 | United States   | 15       | 21     | Interviews                  | Thematic analysis         |
| White <sup>137</sup>      | 2004 | United States   | 6        | 9      | Interviews                  | Thematic analysis         |
| Wiederhold <sup>183</sup> | 2012 | Germany         | 10       |        | Interviews                  | Content analysis          |
| Wilkinson <sup>230</sup>  | 2014 | United Kingdom  | 16       | 45     | Interviews and focus groups | Thematic analysis         |
| Wilkinson <sup>72</sup>   | 2016 | United Kingdom  | 16       | 45     | Interviews and focus groups | Thematic analysis         |
| Wilkinson <sup>73</sup>   | 2011 | United Kingdom  | 48       |        | Interviews                  | Thematic analysis         |



1  
2  
3  
4  
5  
6  
7  
8  
9  
10  
11  
12  
13  
14  
15  
16  
17  
18  
19  
20  
21  
22  
23  
24  
25  
26  
27  
28  
29  
30  
31  
32  
33  
34  
35  
36  
37  
38  
39  
40  
41  
42  
43  
44  
45  
46  
47

| Author                      | Year | Country        | Patients | Carers | Data collection             | Data analysis reported    |
|-----------------------------|------|----------------|----------|--------|-----------------------------|---------------------------|
| Williams <sup>99</sup>      | 2009 | Australia      | 20       |        | Interviews                  | Qualitative analysis      |
| Williams <sup>100</sup>     | 2008 | Australia      | 23       |        | Interviews and focus groups | Interpretative analysis   |
| Williams <sup>254</sup>     | 2009 | Australia      | 23       |        | Interviews                  | Qualitative analysis      |
| Wilson <sup>247</sup>       | 2015 | United Kingdom | 15       | 15     | Focus groups                | Thematic analysis         |
| Winterbottom <sup>227</sup> | 2012 | United Kingdom | 20       |        | Interviews                  | Thematic analysis         |
| Wu <sup>64</sup>            | 2015 | Taiwan         | 15       |        | Interviews                  | Thematic analysis         |
| Xi <sup>156</sup>           | 2013 | Canada         | 10       |        | Interviews                  | Thematic analysis         |
| Xi <sup>108</sup>           | 2011 | Canada         | 13       |        | Interviews                  | Thematic analysis         |
| Yeun <sup>141</sup>         | 2016 | Korea          |          | 33     | Interviews                  | Q methodology             |
| Yngman-Uhlin <sup>133</sup> | 2010 | Sweden         | 14       |        | Interviews                  | Phenomenological analysis |
| Yngman-Uhlin <sup>130</sup> | 2016 | Sweden         | 8        |        | Interviews                  | Content analysis          |
| Yodchai <sup>250</sup>      | 2016 | Thailand       | 20       |        | Interviews                  | Qualitative analysis      |
| Yodchai <sup>197</sup>      | 2012 | Thailand       | 5        |        | Interviews                  | Grounded Theory           |
| Yu <sup>110</sup>           | 2014 | Singapore      | 32       |        | Interviews                  | Thematic analysis         |
| Yumang <sup>142</sup>       | 2009 | Canada         | 9        |        | Interviews                  | Colaizzi's method         |
| Ziegert <sup>208</sup>      | 2006 | Sweden         |          | 13     | Interviews                  | Content analysis          |
| Ziegert <sup>209</sup>      | 2009 | Sweden         | 20       |        | Interviews                  | Content analysis          |
| Ziegert <sup>210</sup>      | 2001 | Sweden         |          | 12     | Interviews                  | Pragmatic approach        |

**Table 3. Illustrative quotations**

---

**Structural inequalities**

---

[Undocumented immigrant in US without access to scheduled haemodialysis] When you enter through the emergency department, you arrive in bad shape...you need to have a high potassium or they send you home even though you feel you are dying. Sometimes, you crawl out when they decide to not do dialysis. You eat a banana because it is high in potassium even though you may die and you go back and wait and hope that they will do dialysis so that you don't feel like you are drowning and so that the anxiety goes away. (American patient).<sup>50</sup>

My mother got some help from DIF (Mexican social assistance office), it was five haemodialysis sessions; when there was no session left, we went to a private centre, there is a foundation there and they helped us... they gave me eight sessions. After that, my mom went to DIF in Zapopan again and they sent us to DIF in Guadalajara. We got some help there (Mexican patient without coverage).<sup>45</sup>

---

**Workload**

---

Sometimes I have to sit and wait at least an hour and I have to call and say my ride is not here yet, which makes me late getting there, which makes me late getting on the machine, which makes me late getting off the machine. And then... coming to pick you up, if you're not ready when they get there, they will leave you and you'll have to sit and wait and wait and wait (American patient).<sup>84</sup>

---

**Capacity**

---

Before she left (pause) when everything was happy and happy sort of thing, you know, I think it was- she was going to give a kidney to somebody else and somebody else was going to give a kidney to somebody and somebody was going to give a kidney to me – like a triangle... she was willing to do that. It

---

1  
2  
3  
4  
5  
6 didn't happen, um (pause) 'cos she left (UK patient).<sup>37</sup>  
7

8  
9 Control and decision making

10  
11 I have free reign of whatever days I want to take off. They don't tell me when I have to dialyse or when I can't dialyse.  
12  
13 Everything is under my control. That's what I like (talking on home dialysis, patient from Canada).<sup>156</sup>  
14

15 Carers' involvement

16  
17  
18 I just sit here like a robot. Nurses asked me to buy items that my mother needed. They never told me why she needed them. They ordered me to pay for  
19 dialysis, laboratory investigations and other things. I don't like it when I do not know the reason behind my actions. I am sad to see myself as a fool being  
20 tossed around (Caregiver from Nigeria).<sup>63</sup>  
21

22  
23 End-of-life

24  
25  
26 Then [the home care nurse] said 'Well you haven't got to go on. We'll make it quite peaceful for you to pass on.' They can tell  
27 you, but it's your body. It's up to me to decide what I want to do' (Patient from UK).<sup>202</sup>  
28  
29  
30  
31  
32  
33  
34  
35  
36  
37  
38  
39  
40

Table 4: Summary of results

| Qualitative Analysis    |                           |                                                                                                                                                                                                                                                                                                                                                                                                                                                                                                                                                                                                                                                                                                                                                                                                                                                                                           |
|-------------------------|---------------------------|-------------------------------------------------------------------------------------------------------------------------------------------------------------------------------------------------------------------------------------------------------------------------------------------------------------------------------------------------------------------------------------------------------------------------------------------------------------------------------------------------------------------------------------------------------------------------------------------------------------------------------------------------------------------------------------------------------------------------------------------------------------------------------------------------------------------------------------------------------------------------------------------|
| Primary category        | Secondary category        | Summary results                                                                                                                                                                                                                                                                                                                                                                                                                                                                                                                                                                                                                                                                                                                                                                                                                                                                           |
| Structural disadvantage | <i>Access to care.</i>    | Socio-economic status is central to experience of CKD. <sup>33 35-61</sup><br>Treatment costs were major obstacle to care <sup>45-47 62</sup> as was limited access to healthcare for the un- or under-insured. <sup>33 38 46 48 50 58 65 66</sup><br>Transplants, dialysis and drug treatments were often beyond the reach of low-income patients. <sup>33 45-47 64 81-83</sup><br>Un- or under-insured people experienced increased dependence on emergency care. <sup>33 45-47 50 64</sup><br>Poorly funded or unfunded healthcare was often fragmented and of indeterminate duration. <sup>45 46 62</sup><br>For non-native speakers, language was an important barrier for having a discussion with care providers. <sup>51 72-74</sup><br>Patients were often poorly informed about disease progression and treatment options. <sup>36 48 55 56 61 62 125-127 186 202 216-219</sup> |
|                         | <i>Housing</i>            | Homelessness, unsuitable housing, lack of utilities (electricity, clean running water) are critical to self-care and home dialysis. <sup>49 59 68 84</sup>                                                                                                                                                                                                                                                                                                                                                                                                                                                                                                                                                                                                                                                                                                                                |
|                         | <i>Employment status.</i> | Loss of employment may lead to un- or under-insurance that limits or prevents access to treatment. <sup>33 37 43 50 58 67 70 85-89</sup>                                                                                                                                                                                                                                                                                                                                                                                                                                                                                                                                                                                                                                                                                                                                                  |
| Workload                | <i>Self-care.</i>         | Complex medication regimens were managed through dispensing aids, associated activities, family support. <sup>38 44 69 84 90-101</sup><br>When taking care of their vascular access, patients made efforts to protect the arm. <sup>106 109</sup><br>Patients controlled their diets and fluid intake, and managed food cravings and thirst. <sup>61 110</sup><br>Many modified social activities to minimise exposure to hot weather, temptation, and social pressure. <sup>110 116-118</sup><br>Women could face family conflicts if they followed prescribed diets. <sup>43 60 119-122</sup><br>Restrictive diets were sometimes stigmatized as a sign of poverty. <sup>119</sup>                                                                                                                                                                                                      |
|                         | <i>Fund-raising.</i>      | Fund raising was important for those who were un- or under-insured, sold goods or services, organised raffles, or obtained loans. <sup>45-47</sup><br>Patients contacted centres, other patients, and organisations to ask for free treatment when they were un – or under-insured. <sup>45 47 50 214 215</sup>                                                                                                                                                                                                                                                                                                                                                                                                                                                                                                                                                                           |
|                         | <i>Travel and time</i>    | Patients often travelled for long distances to dialysis centres, 3 times a week. <sup>13 45-47 51 74 84 124-131</sup>                                                                                                                                                                                                                                                                                                                                                                                                                                                                                                                                                                                                                                                                                                                                                                     |

1  
2  
3  
4  
5  
6  
7  
8  
9  
10  
11  
12  
13  
14  
15  
16  
17  
18  
19  
20  
21  
22  
23  
24  
25  
26  
27  
28  
29  
30  
31  
32  
33  
34  
35  
36  
37  
38  
39  
40  
41  
42  
43  
44  
45  
46  
47

|                                                        |                                                                                                                                                                                                                                                                                                                                                                                                                                                                                                                                                                                                                                    |
|--------------------------------------------------------|------------------------------------------------------------------------------------------------------------------------------------------------------------------------------------------------------------------------------------------------------------------------------------------------------------------------------------------------------------------------------------------------------------------------------------------------------------------------------------------------------------------------------------------------------------------------------------------------------------------------------------|
| <i>management.</i>                                     | <p>Home dialysis patients had to pay transport to training, appointments, and other check-ups.<sup>51 59 67-70</sup></p> <p>Patients arranged daily activities between sessions, adjusted activities to their fatigue, and tried to schedule medical appointments all on one day.<sup>53 132-143</sup></p> <p>Parents arranged child-care while they were in sessions or when they were tired.<sup>47 51 53 152 153</sup></p>                                                                                                                                                                                                      |
| <i>Home dialysis.</i>                                  | <p>Training was required with extended periods off work.<sup>59 68 154-156</sup></p> <p>Homes needed physical adaptation, carers invested efforts in maintaining cleanliness and hygiene.<sup>150 156-160</sup></p> <p>Specific tasks were managing treatment at set times, recording blood pressure and body weight, titrating medications, adopting aseptic techniques.<sup>154 155 161</sup></p>                                                                                                                                                                                                                                |
| <i>Pre-transplant adaptation.</i>                      | <p>Patients adjusted to being on transplant waiting-list, prepared for transplant from a deceased donor at any time.<sup>41 113 131 162-168</sup></p> <p>Specific adjustment tasks included: hospital visits, tests, and organizing payment for treatment.<sup>130 131 162 163 168-171</sup></p> <p>Some people needed to negotiate donation of a kidney by living relatives or others.<sup>37 45 162 172</sup></p>                                                                                                                                                                                                                |
| <i>Post-transplant adjustment.</i>                     | <p>Transplanted patients managed complex medication regimens, balanced against the need to re-enter the labour market to pay off loans.<sup>82 83 173-178</sup></p> <p>Post-transplant, patients needed to manage relationships, finances, and family responsibilities in context of prognostic uncertainty<sup>81 83 173-175 179-184</sup></p>                                                                                                                                                                                                                                                                                    |
| <b>Capacity</b><br><i>Physical and mental capacity</i> | <p>Daily activities were limited by symptoms associated with dialysis (pain, fatigue, anxiety, and depression).<sup>35 42 53 61 88 94 136 138 152 185-197</sup></p> <p>Symptoms were sometimes overlooked by health professionals.<sup>56 92 99 199-201</sup></p> <p>When in poor health, patients relied on wider networks for food preparation, transportation, shopping, ordering supplies, symptom management, and training.<sup>35 116 159 202-205</sup></p> <p>Carers were involved in the treatment, accompanying patients to dialysis and responding to psychosocial needs.<sup>43 67 95 127 139 141 159 207-212</sup></p> |
| <i>Information deficits.</i>                           | <p>Information on disease and treatment was often insufficient or difficult to comprehend, particularly during early stages.<sup>59 75 90 107 119 128 129 220-224</sup></p> <p>Short clinic visits, jargon, and anxiety were barriers to accessing information.<sup>59 100 220 228-231</sup></p>                                                                                                                                                                                                                                                                                                                                   |

1  
2  
3  
4  
5  
6  
7  
8  
9  
10  
11  
12  
13  
14  
15  
16  
17  
18  
19  
20  
21  
22  
23  
24  
25  
26  
27  
28  
29  
30  
31  
32  
33  
34  
35  
36  
37  
38  
39  
40  
41  
42  
43  
44  
45  
46  
47

|                            |                                             |                                                                                                                                                                                                                                                                         |
|----------------------------|---------------------------------------------|-------------------------------------------------------------------------------------------------------------------------------------------------------------------------------------------------------------------------------------------------------------------------|
|                            |                                             | For organ donation and transplantation, patients relied on information from other patients, health professionals, social workers, financial representatives, meetings and the internet. <sup>115 172 232-235</sup>                                                      |
|                            |                                             | Information about the effects and side-effects of immunosuppression was important but hard to come by. <sup>176 182 183 236-239</sup>                                                                                                                                   |
|                            |                                             | Stress and urgency affected how people with CKD processed information provided by healthcare professionals. <sup>237 239-242</sup>                                                                                                                                      |
|                            | <i>Social support.</i>                      | Support from friends, family, neighbours, health professionals and other patients was essential. <sup>37 42 58 60 212 243-248</sup> Lack of social support was a frequently reported problem. <sup>42 58 244 252</sup>                                                  |
|                            |                                             | Patients ought to maintain a sense of normalcy, integrating dialysis community into their network. <sup>40 137 207 253</sup>                                                                                                                                            |
|                            |                                             | Younger patients sometimes considered home dialysis as an opportunity for employment and contact with social networks. <sup>59 150</sup>                                                                                                                                |
| <b>Experienced control</b> | <i>Personal control and decision-making</i> | When clinicians failed to discuss care, eligibility for transplant, and potential donors, patients felt disempowered. <sup>37 53 55 56 75 76 167 278</sup>                                                                                                              |
|                            |                                             | When relatives offered to donate a kidney, many patients were reluctant to accept because of concerns on future health of donor; other patients had reservations about kidneys from deceased donors because of the donor's age, medical history. <sup>170 179 232</sup> |
|                            |                                             | Once transplanted, main clinical objective was preserving the graft. <sup>47 61 87 94 165 279-281</sup>                                                                                                                                                                 |
|                            | <i>Carers' involvement.</i>                 | Carers needed more information on dialysis techniques to feel confident, stressed the importance of 24-hour telephone support, wanted to be involved in decision-making as dialysis would also affect them. <sup>53 68 109 154-156 220 275 282</sup>                    |
|                            |                                             | When carers perceived patient was in pain with no response to treatment, they sometimes yearned for the patient's freedom of this condition through a peaceful death. <sup>132 139 159</sup>                                                                            |
|                            | <i>End-of-life decisions.</i>               | Patients and carers emphasised self-determination, autonomy and dignity. <sup>132 134 202 255 289</sup>                                                                                                                                                                 |
|                            |                                             | End-of-life decisions were influenced by ideas about personal fulfilment, nature taking its course, fears of dependence, or of dialysis accelerating death. <sup>126 288</sup> Decisions often passed to trusted carers or professionals. <sup>285-287</sup>            |
|                            |                                             | Acceptance of decisions was influenced by treatment modality, patient age, and ineffectiveness of haemodialysis. <sup>62 126 132 159</sup>                                                                                                                              |
|                            |                                             | Families emphasized importance of respecting patients' wishes. <sup>199 230 287</sup>                                                                                                                                                                                   |

## REFERENCES

1. Ene-lordache B, Perico N, Bikbov B, et al. Chronic kidney disease and cardiovascular risk in six regions of the world (ISN-KDDC): a cross-sectional study. *Lancet Glob Health* 2016;4(5):e307-19. doi: 10.1016/S2214-109X(16)00071-1 [published Online First: 2016/04/23]
2. Schlieper G, Hess K, Floege J, et al. The vulnerable patient with chronic kidney disease. *Nephrol Dial Transplant* 2016;31(3):382-90. doi: 10.1093/ndt/gfv041 [published Online First: 2015/03/07]
3. Go AS, Chertow GM, Fan D, et al. Chronic Kidney Disease and the Risks of Death, Cardiovascular Events, and Hospitalization. *N Engl J Med* 2016;351(13):1296-305.
4. Chillon JM, Massy ZA, Stengel B. Neurological complications in chronic kidney disease patients. *Nephrol Dial Transplant* 2016;31(10):1606-14. doi: 10.1093/ndt/gfv315 [published Online First: 2015/09/12]
5. Levin A, Tonelli M, Bonventre J, et al. Global kidney health 2017 and beyond: a roadmap for closing gaps in care, research, and policy. *Lancet* 2017 doi: 10.1016/S0140-6736(17)30788-2 [published Online First: 2017/04/25]
6. Stanifer JW, Muiru A, Jafar TH, et al. Chronic kidney disease in low- and middle-income countries. *Nephrol Dial Transplant* 2016;31(6):868-74. doi: 10.1093/ndt/gfv466 [published Online First: 2016/05/25]
7. Liyanage T, Ninomiya T, Jha V, et al. Worldwide access to treatment for end-stage kidney disease: a systematic review. *Lancet* 2015;385(9981):1975-82. doi: 10.1016/S0140-6736(14)61601-9 [published Online First: 2015/03/18]
8. Fraser SD, Roderick PJ, May CR, et al. The burden of comorbidity in people with chronic kidney disease stage 3: a cohort study. *BMC Nephrol* 2015;16:193. doi: 10.1186/s12882-015-0189-z [published Online First: 2015/12/02]
9. Fraser SD, Taal MW. Multimorbidity in people with chronic kidney disease: implications for outcomes and treatment. *Curr Opin Nephrol Hypertens* 2016;25(6):465-72. doi: 10.1097/MNH.0000000000000270 [published Online First: 2016/10/18]
10. Holman HR. Chronic illness and the healthcare crisis. *Chronic Illness* 2006;1(4):265-74.
11. May CR, Eton DT, Boehmer K, et al. Rethinking the patient: using Burden of Treatment Theory to understand the changing dynamics of illness. *BMC Health Serv Res* 2014;14:281. doi: 10.1186/1472-6963-14-281 [published Online First: 2014/06/28]
12. May C. Chronic illness and intractability: professional-patient interactions in primary care. *Chronic Illness* 2005;1(1):15-20.
13. Karamanidou C, Weinman J, Horne R. A qualitative study of treatment burden among haemodialysis recipients. *J Health Psychol* 2014;19(4):556-69. doi: 10.1177/1359105313475898 [published Online First: 2013/03/09]
14. Eton DT, Elraiyah TA, Yost KJ, et al. A systematic review of patient-reported measures of burden of treatment in three chronic diseases. *Patient Relat Outcome Meas* 2013;4:7-20. doi: 10.2147/PROM.S44694 [published Online First: 2013/07/09]
15. Bohlen K, Scoville E, Shippee ND, et al. Overwhelmed patients: a videographic analysis of how patients with type 2 diabetes and clinicians articulate and address treatment burden during clinical encounters. *Diabetes Care* 2012;35(1):47-9. doi: 10.2337/dc11-1082 [published Online First: 2011/11/22]
16. Gallacher K, Jani B, Morrison D, et al. Qualitative systematic reviews of treatment burden in stroke, heart failure and diabetes - methodological challenges and solutions. *BMC Med Res Methodol* 2013;13:10. doi: 10.1186/1471-2288-13-10 [published Online First: 2013/01/30]

17. Gallacher K, May CR, Montori VM, et al. Understanding patients' experiences of treatment burden in chronic heart failure using normalization process theory. *Ann Fam Med* 2011;9(3):235-43. doi: 10.1370/afm.1249 [published Online First: 2011/05/11]
18. Gallacher K, Morrison D, Jani B, et al. Uncovering treatment burden as a key concept for stroke care: a systematic review of qualitative research. *PLoS Med* 2013;10(6):e1001473. doi: 10.1371/journal.pmed.1001473 [published Online First: 2013/07/05]
19. Ridgeway JL, Egginton JS, Tiedje K, et al. Factors that lessen the burden of treatment in complex patients with chronic conditions: a qualitative study. *Patient Prefer Adherence* 2014;8:339-51. doi: 10.2147/PPA.S58014 [published Online First: 2014/03/29]
20. Shippee ND, Shah ND, May CR, et al. Cumulative complexity: a functional, patient-centered model of patient complexity can improve research and practice. *J Clin Epidemiol* 2012;65(10):1041-51. doi: 10.1016/j.jclinepi.2012.05.005 [published Online First: 2012/08/23]
21. Sav A, Kendall E, McMillan SS, et al. 'You say treatment, I say hard work': treatment burden among people with chronic illness and their carers in Australia. *Health Soc Care Community* 2013;21(6):665-74. doi: 10.1111/hsc.12052 [published Online First: 2013/05/25]
22. Sav A, King MA, Whitty JA, et al. Burden of treatment for chronic illness: a concept analysis and review of the literature. *Health Expect* 2015;18(3):312-24. doi: 10.1111/hex.12046 [published Online First: 2013/02/01]
23. Eton DT, Ramalho de Oliveira D, Egginton JS, et al. Building a measurement framework of burden of treatment in complex patients with chronic conditions: a qualitative study. *Patient Relat Outcome Meas* 2012;3:39-49. doi: 10.2147/PROM.S34681 [published Online First: 2012/11/28]
24. Eton DT, Ridgeway JL, Egginton JS, et al. Finalizing a measurement framework for the burden of treatment in complex patients with chronic conditions. *Patient Relat Outcome Meas* 2015;6:117-26. doi: 10.2147/PROM.S78955 [published Online First: 2015/04/08]
25. Tran VT, Barnes C, Montori VM, et al. Taxonomy of the burden of treatment: a multi-country web-based qualitative study of patients with chronic conditions. *BMC Med* 2015;13:115. doi: 10.1186/s12916-015-0356-x [published Online First: 2015/05/15]
26. Boehmer KR, Gionfriddo MR, Rodriguez-Gutierrez R, et al. Patient capacity and constraints in the experience of chronic disease: a qualitative systematic review and thematic synthesis. *BMC Fam Pract* 2016;17:127. doi: 10.1186/s12875-016-0525-9 [published Online First: 2016/09/03]
27. Hunt KJ, May CR. Managing expectations: cognitive authority and experienced control in complex healthcare processes. *BMC Health Serv Res* 2017;17(1):459. doi: 10.1186/s12913-017-2366-1 [published Online First: 2017/07/07]
28. May CR, Cummings A, Myall M, et al. Experiences of long-term life-limiting conditions among patients and carers: what can we learn from a meta-review of systematic reviews of qualitative studies of chronic heart failure, chronic obstructive pulmonary disease and chronic kidney disease? *BMJ Open* 2016;6(10):e011694. doi: 10.1136/bmjopen-2016-011694 [published Online First: 2016/10/07]
29. May CR, Masters J, Welch L, et al. EXPERTS 1-experiences of long-term life-limiting conditions among patients and carers: protocol for a qualitative meta-synthesis and conceptual modelling study. *BMJ Open* 2015;5(4):e007372. doi: 10.1136/bmjopen-2014-007372 [published Online First: 2015/04/04]



- 1  
2  
3 30. Tong A, Flemming K, McInnes E, et al. Enhancing transparency in reporting the synthesis  
4 of qualitative research: ENTREQ. *BMC Med Res Methodol* 2012;12(181):181. doi:  
5 10.1186/1471-2288-12-181 [published Online First: 2012/11/29]  
6 31. Critical Appraisal Skills Program (CASP): CASP Checklists Oxford2014 [Available from:  
7 [www.casp-uk.net](http://www.casp-uk.net) accessed May-June 2017 2017.  
8 32. May C, Finch T. Implementing, Embedding, and Integrating Practices: An Outline of  
9 Normalization Process Theory. *Sociology* 2009;43(3):535-54. doi:  
10 10.1177/0038038509103208  
11 33. Kahn LS, Vest BM, Madurai N, et al. Chronic kidney disease (CKD) treatment burden  
12 among low-income primary care patients. *Chronic Illn* 2015;11(3):171-83. doi:  
13 10.1177/1742395314559751 [published Online First: 2014/11/25]  
14 34. Demain S, Goncalves AC, Areia C, et al. Living with, managing and minimising treatment  
15 burden in long term conditions: a systematic review of qualitative research. *PLoS*  
16 *One* 2015;10(5):e0125457. doi: 10.1371/journal.pone.0125457 [published Online  
17 First: 2015/05/30]  
18 35. Fráguas G, Soares SM, Silva PA. The Family in the Context of the Care to the Diabetic  
19 Nephropathy-holder: Demands and Resources. *Escola Anna Nery - Revista de*  
20 *Enfermagem* 2008;12(2):271-77.  
21 36. Ashby M, op't Hoog C, Kellehear A, et al. Renal dialysis abatement: lessons from a social  
22 study. *Palliat Med* 2005;19(5):389-96. doi: 10.1191/0269216305pm1043oa  
23 [published Online First: 2005/08/23]  
24 37. Bailey PK, Ben-Shlomo Y, Tomson CR, et al. Socioeconomic deprivation and barriers to  
25 live-donor kidney transplantation: a qualitative study of deceased-donor kidney  
26 transplant recipients. *BMJ Open* 2016;6(3):e010605. doi: 10.1136/bmjopen-2015-  
27 010605 [published Online First: 2016/03/05]  
28 38. Chiaranai C. The Lived Experience of Patients Receiving Hemodialysis Treatment for End-  
29 Stage Renal Disease: A Qualitative Study. *J Nurs Res* 2016;24(2):101-8. doi:  
30 10.1097/jnr.000000000000100 [published Online First: 2015/08/15]  
31 39. Cho MK, Shin G. Gender-based experiences on the survival of chronic renal failure  
32 patients under hemodialysis for more than 20 years. *Appl Nurs Res* 2016;32:262-68.  
33 doi: 10.1016/j.apnr.2016.08.008 [published Online First: 2016/12/15]  
34 40. Dekker W, Uerz I, Wils JP. Living well with end stage renal disease: patients' narratives  
35 interrupted from a virtue perspective. *Ethical theory and moral practice : an*  
36 *international forum* 2005;8(5):485-506. [published Online First: 2006/03/17]  
37 41. Ekelund ML, Andersson SI. "I need to lead my own life in any case"--a study of patients in  
38 dialysis with or without a partner. *Patient Educ Couns* 2010;81(1):30-6. doi:  
39 10.1016/j.pec.2009.10.025 [published Online First: 2009/12/08]  
40 42. Kazley AS, Johnson E, Simpson K, et al. African American patient knowledge of kidney  
41 disease: A qualitative study of those with advanced chronic kidney disease. *Chronic*  
42 *Illn* 2015;11(4):245-55. doi: 10.1177/1742395314556658 [published Online First:  
43 2014/10/23]  
44 43. Lee VY, Seah WY, Kang AW, et al. Managing multiple chronic conditions in Singapore -  
45 Exploring the perspectives and experiences of family caregivers of patients with  
46 diabetes and end stage renal disease on haemodialysis. *Psychol Health*  
47 2016;31(10):1220-36. doi: 10.1080/08870446.2016.1203921 [published Online First:  
48 2016/06/30]  
49 44. Lindberg M, Lindberg P. Overcoming obstacles for adherence to phosphate binding  
50 medication in dialysis patients: a qualitative study. *Pharm World Sci* 2008;30(5):571-  
51 6. doi: 10.1007/s11096-008-9212-9 [published Online First: 2008/03/28]  
52  
53  
54  
55  
56  
57  
58  
59  
60

- 1
- 2
- 3
- 4 45. Mercado-Martínez FJ, Correa-Mauricio ME. Living in hemodialysis without social
- 5 insurance: The voices of renal sick people and their families. *Salud Publica Mex*
- 6 2015;57(2):155-60.
- 7 46. Mercado-Martínez FJ, Silva DGvd, Souza SdSd, et al. Vivendo com insuficiência renal:
- 8 obstáculos na terapia da hemodiálise na perspectiva das pessoas doentes e suas
- 9 famílias. *Physis: Revista de Saúde Coletiva* 2015;25(1):59-74. doi: 10.1590/s0103-
- 10 73312015000100005
- 11 47. Mercado-Martínez FJ, Hernández-Ibarra E, Ascencio-Mera CD, et al. Viviendo con
- 12 trasplante renal, sin protección social en salud: ¿Qué dicen los enfermos sobre las
- 13 dificultades económicas que enfrentan y sus efectos? *Cad Saude Publica*
- 14 2014;30(10):2092-100. doi: 10.1590/0102-311x00150713
- 15 48. Seah AS, Tan F, Srinivas S, et al. Opting out of dialysis - Exploring patients' decisions to
- 16 forego dialysis in favour of conservative non-dialytic management for end-stage
- 17 renal disease. *Health Expect* 2015;18(5):1018-29. doi: 10.1111/hex.12075 [published
- 18 Online First: 2013/05/08]
- 19 49. Walker RC, Howard K, Tong A, et al. The economic considerations of patients and
- 20 caregivers in choice of dialysis modality. *Hemodial Int* 2016;20(4):634-42. doi:
- 21 10.1111/hdi.12424 [published Online First: 2016/05/20]
- 22 50. Cervantes L, Fischer S, Berlinger N, et al. The Illness Experience of Undocumented
- 23 Immigrants With End-stage Renal Disease. *JAMA Intern Med* 2017;177(4):529-35.
- 24 doi: 10.1001/jamainternmed.2016.8865 [published Online First: 2017/02/07]
- 25 51. Anderson K, Cunningham J, Devitt J, et al. "Looking back to my family": indigenous
- 26 Australian patients' experience of hemodialysis. *BMC Nephrol* 2012;13(114):114.
- 27 doi: 10.1186/1471-2369-13-114 [published Online First: 2012/09/21]
- 28 52. Polaschek N. Living on dialysis: concerns of clients in a renal setting. *J Adv Nurs*
- 29 2003;41(1):44-52. [published Online First: 2003/01/10]
- 30 53. Polaschek N. Managing home dialysis: the client perspective on independent treatment.
- 31 *Renal Society of Australasia Journal* 2006;2(3):53-63.
- 32 54. Polaschek N. 'Doing dialysis at home': client attitudes towards renal therapy. *J Clin Nurs*
- 33 2007;16(3A):51-8. doi: 10.1111/j.1365-2702.2006.01622.x [published Online First:
- 34 2007/05/24]
- 35 55. Rix EF, Barclay L, Stirling J, et al. The perspectives of Aboriginal patients and their health
- 36 care providers on improving the quality of hemodialysis services: a qualitative study.
- 37 *Hemodial Int* 2015;19(1):80-9. doi: 10.1111/hdi.12201 [published Online First:
- 38 2014/07/25]
- 39 56. Rix EF, Barclay L, Stirling J, et al. 'Beats the alternative but it messes up your life':
- 40 aboriginal people's experience of haemodialysis in rural Australia. *BMJ Open*
- 41 2014;4(9):e005945. doi: 10.1136/bmjopen-2014-005945 [published Online First:
- 42 2014/09/19]
- 43 57. Shih LCH, M. The impact of dialysis on rurally based Maori and their whanau/families.
- 44 *Nurs Pract N Z* 2011;27(2):5-15.
- 45 58. Valsaraj BP, Bhat SM, Prabhu R, et al. A qualitative research on the experience of
- 46 haemodialysis in South Karnataka: lived experience of persons undergoing
- 47 haemodialysis. *Journal of Krishna Institute of Medical Sciences University*
- 48 2014;3(2):90-100.
- 49 59. Walker RC, Howard K, Morton RL, et al. Patient and caregiver values, beliefs and
- 50 experiences when considering home dialysis as a treatment option: a semi-
- 51 structured interview study. *Nephrol Dial Transplant* 2016;31(1):133-41. doi:
- 52 10.1093/ndt/gfv330 [published Online First: 2015/09/09]
- 53 60. Wells SA. Determinants of Adherence to Living on Dialysis for Mexican Americans. *SAGE*
- 54 *Open* 2015;5(1):1-12. doi: 10.1177/2158244015574961
- 55
- 56
- 57
- 58
- 59
- 60

- 1  
2  
3 61. Tong A, Sainsbury P, Chadban S, et al. Patients' experiences and perspectives of living  
4 with CKD. *Am J Kidney Dis* 2009;53(4):689-700. doi: 10.1053/j.ajkd.2008.10.050  
5 [published Online First: 2009/02/14]
- 6 62. Allen D, Badro V, Denyer-Willis L, et al. Fragmented care and whole-person illness:  
7 Decision-making for people with chronic end-stage kidney disease. *Chronic Illn*  
8 2015;11(1):44-55. doi: 10.1177/1742395314562974 [published Online First:  
9 2014/12/06]
- 10 63. Oyegbile YO, Brysiewicz P. Family caregiver's experiences of providing care to patients  
11 with End-Stage Renal Disease in South-West Nigeria. *J Clin Nurs* 2017;26(17-  
12 18):2624-32. doi: 10.1111/jocn.13689 [published Online First: 2016/12/17]
- 13 64. Wu CC, Lin CC, Hsieh HF, et al. Lived experiences and illness representation of Taiwanese  
14 patients with late-stage chronic kidney disease. *J Health Psychol* 2016;21(12):2788-  
15 98. doi: 10.1177/1359105315587134 [published Online First: 2015/06/11]
- 16 65. Nobahar M. Exploring experiences of the quality of nursing care among patients, nurses,  
17 caregivers and physicians in a haemodialysis department. *Journal of Renal Care*  
18 2016;xx(xx):1-10.
- 19 66. Nobahar M, Tamadon MR. Barriers to and facilitators of care for hemodialysis patients; a  
20 qualitative study. *J Renal Inj Prev* 2016;5(1):39-44. doi: 10.15171/jrip.2016.09  
21 [published Online First: 2016/04/14]
- 22 67. Blogg AH, Hyde C. The experience of spouses caring for a person on home haemodialysis:  
23 an ethnography. *Renal Society of Australasia Journal* 2008;4(3):75-80.
- 24 68. Hanson CS, Chapman JR, Craig JC, et al. Patient experiences of training and transition to  
25 home haemodialysis: A mixed-methods study. *Nephrology* 2017;22(8):631-41. doi:  
26 10.1111/nep.12827 [published Online First: 2016/06/03]
- 27 69. Rygh E, Arild E, Johnsen E, et al. Choosing to live with home dialysis-patients' experiences  
28 and potential for telemedicine support: a qualitative study. *BMC Nephrol*  
29 2012;13(13):13. doi: 10.1186/1471-2369-13-13 [published Online First: 2012/03/21]
- 30 70. Sadala MLcAj, Bruzos GAdS, Pereira ER, et al. Patients' experiences of peritoneal dialysis  
31 at home: a phenomenological approach. *Rev Latino-am Enfermagem* 2012;20(1):68-  
32 75.
- 33 71. Keeping LM, English LM. Informal and incidental learning with patients who use  
34 continuous ambulatory peritoneal dialysis. *Nephrol Nurs J* 2001;28(3):313-23.
- 35 72. Wilkinson E, Randhawa G, Brown E, et al. Exploring access to end of life care for ethnic  
36 minorities with end stage kidney disease through recruitment in action research.  
37 *BMC Palliat Care* 2016;15(57):57. doi: 10.1186/s12904-016-0128-1 [published Online  
38 First: 2016/07/13]
- 39 73. Wilkinson E, Randhawa G, Farrington K, et al. Lack of awareness of kidney complications  
40 despite familiarity with diabetes: a multi-ethnic qualitative study. *Journal of renal  
41 care* 2011;37(1):2-11. doi: 10.1111/j.1755-6686.2011.00199.x [published Online  
42 First: 2011/02/04]
- 43 74. Tijerina MS. Psychosocial factors influencing Mexican-American women's adherence with  
44 hemodialysis treatment. *Soc Work Health Care* 2006;43(1):57-74. doi:  
45 10.1300/J010v43n01\_04 [published Online First: 2006/05/26]
- 46 75. Anderson K, Devitt J, Cunningham J, et al. "All they said was my kidneys were dead":  
47 Indigenous Australian patients' understanding of their chronic kidney disease. *Med J  
48 Aust* 2008;189(9):499-503.
- 49 76. Burnette L, Kickett M. 'You are just a puppet': Australian Aboriginal people's experience  
50 of disempowerment when undergoing treatment for end-stage renal disease. *Renal  
51 Society of Australasia Journal* 2009;5(3):113-18.
- 52  
53  
54  
55  
56  
57  
58  
59  
60

- 1  
2  
3 77. Morton RL, Devitt J, Howard K, et al. Patient views about treatment of stage 5 CKD: a  
4 qualitative analysis of semistructured interviews. *Am J Kidney Dis* 2010;55(3):431-40.  
5 doi: 10.1053/j.ajkd.2009.11.011 [published Online First: 2010/02/02]
- 6 78. Walker RC, Walker S, Morton RL, et al. Maori patients' experiences and perspectives of  
7 chronic kidney disease: a New Zealand qualitative interview study. *BMJ Open*  
8 2017;7(1):e013829. doi: 10.1136/bmjopen-2016-013829 [published Online First:  
9 2017/01/21]
- 10 79. Stewart M. Qualitative inquiry: perceptions of sexuality by African Americans  
11 experiencing haemodialysis. *J Adv Nurs* 2013;69(8):1704-13. doi: 10.1111/jan.12028  
12 [published Online First: 2012/10/11]
- 13 80. Salvalaggio GK, L.: Minore, B. Perspectives on health: experiences of First Nations dialysis  
14 patients relocated from remote communities for treatment. *Canadian Journal of*  
15 *Rural Medicine* 2003;8(1):19-24.
- 16 81. Crowley-Matoka M. Desperately seeking "normal": the promise and perils of living with  
17 kidney transplantation. *Soc Sci Med* 2005;61(4):821-31. doi:  
18 10.1016/j.socscimed.2004.08.043 [published Online First: 2005/06/14]
- 19 82. Gordon EJ, Prohaska TR, Gallant M, et al. Self-care strategies and barriers among kidney  
20 transplant recipients: a qualitative study. *Chronic Illn* 2009;5(2):75-91. doi:  
21 10.1177/1742395309103558 [published Online First: 2009/05/29]
- 22 83. Schmid-Mohler G, Schafer-Keller P, Frei A, et al. A mixed-method study to explore  
23 patients' perspective of self-management tasks in the early phase after kidney  
24 transplant. *Prog Transplant* 2014;24(1):8-18. doi: 10.7182/pit2014728 [published  
25 Online First: 2014/03/07]
- 26 84. Chenitz KB, Fernando M, Shea JA. In-center hemodialysis attendance: patient  
27 perceptions of risks, barriers, and recommendations. *Hemodial Int* 2014;18(2):364-  
28 73. doi: 10.1111/hdi.12139 [published Online First: 2014/01/23]
- 29 85. Campos CJ, Turato ER. Hemodialysis treatment as perceived by the renal patient:  
30 clinical qualitative study. *Rev Bras Enferm* 2010;63(5):799-805.
- 31 86. Campos CG, Mantovani MeF, Nascimento ME, et al. Social representations of illness  
32 among people with chronic kidney disease. *Revista gaúcha de enfermagem /*  
33 *EENFUFRGS* 2015;36(2):106-12. doi: 10.1590/1983-1447.2015.02.48183
- 34 87. de Brito DC, de Paula AM, Grincenkov FR, et al. Analysis of the changes and difficulties  
35 arising from kidney transplantation: a qualitative study. *Rev Lat Am Enfermagem*  
36 2015;23(3):419-26. doi: 10.1590/0104-1169.0106.2571 [published Online First:  
37 2015/08/28]
- 38 88. Finnegan-John J, Thomas VJ. The psychosocial experience of patients with end-stage  
39 renal disease and its impact on quality of life: findings from a needs assessment to  
40 shape a service. *ISRN nephrology* 2013;2013:308986. doi: 10.5402/2013/308986  
41 [published Online First: 2013/01/01]
- 42 89. King N, Carroll C, Newton P, et al. "You can't cure it so you have to endure it": the  
43 experience of adaptation to diabetic renal disease. *Qual Health Res* 2002;12(3):329-  
44 46. doi: 10.1177/104973202129119928 [published Online First: 2002/03/29]
- 45 90. Costantini L, Beanlands H, McCay E, et al. The self-management experience of people  
46 with mild to moderate chronic kidney disease. *Nephrol Nurs J* 2008;35(2):147-55;  
47 quiz 56. [published Online First: 2008/05/14]
- 48 91. Lopez-Vargas PA, Tong A, Howell M, et al. Patient awareness and beliefs about the risk  
49 factors and comorbidities associated with chronic kidney disease : A mixed-methods  
50 study. *Nephrology* 2017;22(5):374-81. doi: 10.1111/nep.12829 [published Online  
51 First: 2016/06/02]
- 52  
53  
54  
55  
56  
57  
58  
59  
60

- 1  
2  
3 92. Lopez-Vargas PA, Tong A, Phoon RK, et al. Knowledge deficit of patients with stage 1-4  
4 CKD: a focus group study. *Nephrology* 2014;19(4):234-43. doi: 10.1111/nep.12206  
5 [published Online First: 2014/01/17]  
6 93. Mason J, Stone M, Khunti K, et al. Educational needs for blood pressure control in  
7 chronic kidney disease. *Journal of renal care* 2007;33(3):134-8. [published Online  
8 First: 2007/07/01]  
9 94. Muduma G, Shupo FC, Dam S, et al. Patient survey to identify reasons for non-adherence  
10 and elicitation of quality of life concepts associated with immunosuppressant  
11 therapy in kidney transplant recipients. *Patient Prefer Adherence* 2016;10:27-36. doi:  
12 10.2147/PPA.S96086 [published Online First: 2016/02/03]  
13 95. Noble H, Kelly D, Hudson P. Experiences of carers supporting dying renal patients  
14 managed without dialysis. *J Adv Nurs* 2013;69(8):1829-39. doi: 10.1111/jan.12049  
15 [published Online First: 2012/11/22]  
16 96. Noble H, Meyer J, Bridges J, et al. Examining renal patients' death trajectories without  
17 dialysis. *End of Life Care* 2010;4(2):26-34.  
18 97. Rifkin DE, Laws MB, Rao M, et al. Medication adherence behavior and priorities among  
19 older adults with CKD: a semistructured interview study. *Am J Kidney Dis*  
20 2010;56(3):439-46. doi: 10.1053/j.ajkd.2010.04.021 [published Online First:  
21 2010/08/03]  
22 98. Velez E, Ramasco M. Meaning of illness and illness representations, crucial factors to  
23 integral care. *EDTNA/ERCA journal* 2006;32(2):81-5. [published Online First:  
24 2006/08/11]  
25 99. Williams AF, Manias E. Perceptions of pain control by consumers with chronic kidney  
26 disease. *J Nurs Healthc Chronic Illn* 2009;1(3):199-209. doi: 10.1111/j.1752-  
27 9824.2009.01022.x  
28 100. Williams AF, Manias E, Walker R. Adherence to multiple, prescribed medications in  
29 diabetic kidney disease: A qualitative study of consumers' and health professionals'  
30 perspectives. *Int J Nurs Stud* 2008;45(12):1742-56. doi:  
31 10.1016/j.ijnurstu.2008.07.002 [published Online First: 2008/08/15]  
32 101. Silva RARd, Souza VLd, Oliveira GJNd, et al. Coping strategies used by chronic renal  
33 failure patients on hemodialysis. *Escola Anna Nery - Revista de Enfermagem*  
34 2016;20(1):147-54. doi: 10.5935/1414-8145.20160020  
35 102. Al-Arabi S. Quality of life: subjective descriptions of challenges to patients with end  
36 stage renal disease. *Nephrol Nurs J* 2006;33(3):285-92. [published Online First:  
37 2006/07/25]  
38 103. Bourbonnais FF, Tousignant KF. The pain experience of patients on maintenance  
39 hemodialysis. *Nephrol Nurs J* 2012;39(1):13-9; quiz 20. [published Online First:  
40 2012/04/07]  
41 104. Clarkson KA, Robinson K. Life on dialysis: a lived experience. *Nephrol Nurs J*  
42 2010;37(1):29-35. [published Online First: 2010/03/26]  
43 105. Aasen EM, Kvangarsnes M, Heggen K. Perceptions of patient participation amongst  
44 elderly patients with end-stage renal disease in a dialysis unit. *Scand J Caring Sci*  
45 2012;26(1):61-9. doi: 10.1111/j.1471-6712.2011.00904.x [published Online First:  
46 2011/07/02]  
47 106. Richard CJ, Engebretson J. Negotiating living with an arteriovenous fistula for  
48 hemodialysis. *Nephrol Nurs J* 2010;37(4):363-74; quiz 75. [published Online First:  
49 2010/09/14]  
50 107. Tweed AE, Ceaser K. Renal replacement therapy choices for pre-dialysis renal patients.  
51 *Br J Nurs* 2005;14(12):659-64. doi: 10.12968/bjon.2005.14.12.18287 [published  
52 Online First: 2005/07/13]  
53  
54  
55  
56  
57  
58  
59  
60



- 1  
2  
3 108. Xi W, Harwood L, Diamant MJ, et al. Patient attitudes towards the arteriovenous fistula:  
4 a qualitative study on vascular access decision making. *Nephrol Dial Transplant*  
5 2011;26(10):3302-8. doi: 10.1093/ndt/gfr055 [published Online First: 2011/03/17]  
6 109. Taylor MJ, Hanson CS, Casey JR, et al. "You know your own fistula, it becomes a part of  
7 you"--Patient perspectives on vascular access: A semistructured interview study.  
8 *Hemodial Int* 2016;20(1):5-14. doi: 10.1111/hdi.12340 [published Online First:  
9 2015/07/24]  
10 110. Yu J, Ng HJ, Nandakumar M, et al. The management of food cravings and thirst in  
11 hemodialysis patients: A qualitative study. *J Health Psychol* 2016;21(2):217-27. doi:  
12 10.1177/1359105314525066 [published Online First: 2014/03/25]  
13 111. Cristóvão AF. Dificultades y estrategias en el manejo del régimen terapéutico en el  
14 paciente renal crónico en hemodiálisis. *Enferm Nefrol* 2013;16(4):247-55.  
15 112. Gricio TC, Kusumotol L, Cândido MldL. Perceptions and knowledge of patients with  
16 Chronic Kidney Disease under conservative treatment. *Rev Eletr Enf* 2009;11(4):884-  
17 93.  
18 113. Hagren B, Pettersen IM, Severinsson E, et al. Maintenance haemodialysis: patients'  
19 experiences of their life situation. *J Clin Nurs* 2005;14(3):294-300. doi:  
20 10.1111/j.1365-2702.2004.01036.x [published Online First: 2005/02/15]  
21 114. Herbias LH, Soto RA, Figueroa HB, et al. Meaning of quality of life in patients on  
22 hemodialysis therapy: A phenomenological study. *Revista de la Sociedad Espanola*  
23 *de Enfermeria Nefrologica* 2016;19(1):37-44.  
24 115. Tovazzi ME, Mazzoni V. Personal paths of fluid restriction in patients on hemodialysis.  
25 *Nephrol Nurs J* 2012;39(3):207-15. [published Online First: 2012/08/08]  
26 116. Avril-Sephula B, Meekums B, Jackson C. How do partners living with haemodialysis  
27 patients cope? *Journal of Renal Nursing* 2014;6(3):133-37.  
28 117. Roso CC, Beuter M, Kruse MHL, et al. Self-care of patients in conservative treatment of  
29 chronic renal insufficiency. *Text Context Nursing* 2013;22(3):739-45.  
30 118. Hong LI, Wang W, Chan EY, et al. Dietary and fluid restriction perceptions of patients  
31 undergoing haemodialysis: an exploratory study. *J Clin Nurs* 2017:1-13. doi:  
32 10.1111/jocn.13739 [published Online First: 2017/01/26]  
33 119. de Brito-Ashurst I, Perry L, Sanders TA, et al. Barriers and facilitators of dietary sodium  
34 restriction amongst Bangladeshi chronic kidney disease patients. *J Hum Nutr Diet*  
35 2011;24(1):86-95. doi: 10.1111/j.1365-277X.2010.01129.x [published Online First:  
36 2010/12/01]  
37 120. Theofilou P, Synodinou C, Panagiotaki H. Undergoing haemodialysis-A qualitative study  
38 to investigate the lived experiences of patients. *Europe's Journal of Psychology*  
39 2013;9(1):19-32.  
40 121. Shirazian S, Crnosija N, Weinger K, et al. The self-management experience of patients  
41 with type 2 diabetes and chronic kidney disease: A qualitative study. *Chronic Illn*  
42 2016;12(1):18-28. doi: 10.1177/1742395315614381 [published Online First:  
43 2015/11/06]  
44 122. Walker R, James H, Burns A. Adhering to behaviour change in older pre-dialysis  
45 populations--what do patients think? A qualitative study. *Journal of renal care*  
46 2012;38(1):34-42. doi: 10.1111/j.1755-6686.2012.00262.x [published Online First:  
47 2012/03/01]  
48 123. Kierans C, Padilla-Altamira C, Garcia-Garcia G, et al. When health systems are barriers  
49 to health care: challenges faced by uninsured Mexican kidney patients. *PLoS One*  
50 2013;8(1):e54380. doi: 10.1371/journal.pone.0054380 [published Online First:  
51 2013/01/26]  
52 124. Bristowe K, Horsley HL, Shepherd K, et al. Thinking ahead--the need for early Advance  
53 Care Planning for people on haemodialysis: A qualitative interview study. *Palliat*  
54  
55  
56  
57  
58  
59  
60

- 1  
2  
3 *Med* 2015;29(5):443-50. doi: 10.1177/0269216314560209 [published Online First:  
4 2014/12/21]
- 5 125. Tonkin-Crine S, Okamoto I, Leydon GM, et al. Understanding by older patients of  
6 dialysis and conservative management for chronic kidney failure. *Am J Kidney Dis*  
7 2015;65(3):443-50. doi: 10.1053/j.ajkd.2014.08.011 [published Online First:  
8 2014/10/12]
- 9 126. Johnston S, Noble H. Factors influencing patients with stage 5 chronic kidney disease to  
10 opt for conservative management: a practitioner research study. *J Clin Nurs*  
11 2012;21(9-10):1215-22. doi: 10.1111/j.1365-2702.2011.04001.x [published Online  
12 First: 2012/03/06]
- 13 127. Lo C, Ilic D, Teede H, et al. The Perspectives of Patients on Health-Care for Co-Morbid  
14 Diabetes and Chronic Kidney Disease: A Qualitative Study. *PLoS One*  
15 2016;11(1):e0146615. doi: 10.1371/journal.pone.0146615 [published Online First:  
16 2016/01/06]
- 17 128. Prieto MA, Escudero MJ, Suess A, et al. Patients' opinions and expectations about the  
18 dialysis care process. *An Sist Sanit Navar* 2011;34(1):21-31.
- 19 129. Reta laS, Larrea AA, Uriarte OGa, et al. Withdrawing dialysis in End-Stage Renal Disease:  
20 What do patients think? *Enferm Nefrol* 2014;17(2):110-19.
- 21 130. Yngman-Uhlin P, Fogelberg A, Uhlin F. Life in standby: hemodialysis patients'  
22 experiences of waiting for kidney transplantation. *J Clin Nurs* 2016;25(1-2):92-8. doi:  
23 10.1111/jocn.12994 [published Online First: 2015/10/08]
- 24 131. Moran A, Scott A, Darbyshire P. Waiting for a kidney transplant: patients' experiences  
25 of haemodialysis therapy. *J Adv Nurs* 2011;67(3):501-9. doi: 10.1111/j.1365-  
26 2648.2010.05460.x [published Online First: 2010/10/20]
- 27 132. Axelsson L, Klang B, Lundh Hagelin C, et al. End of life of patients treated with  
28 haemodialysis as narrated by their close relatives. *Scand J Caring Sci* 2015;29(4):776-  
29 84. doi: 10.1111/scs.12209 [published Online First: 2015/03/11]
- 30 133. Yngman-Uhlin P, Friedrichsen M, Gustavsson M, et al. Circling around in tiredness:  
31 perspectives of patients on peritoneal dialysis. *Nephrol Nurs J* 2010;37(4):407-13.  
32 [published Online First: 2010/09/14]
- 33 134. Axelsson L, Randers I, Jacobson SH, et al. Living with haemodialysis when nearing end of  
34 life. *Scand J Caring Sci* 2012;26(1):45-52. doi: 10.1111/j.1471-6712.2011.00902.x  
35 [published Online First: 2011/05/25]
- 36 135. Heiwe S, Clyne N, Dahlgren MA. Living with chronic renal failure: patients' experiences  
37 of their physical and functional capacity. *Physiother Res Int* 2003;8(4):167-77.
- 38 136. Horigan AE, Schneider SM, Docherty S, et al. The experience and self-management of  
39 fatigue in patients on hemodialysis. *Nephrol Nurs J* 2013;40(2):113-22; quiz 23.  
40 [published Online First: 2013/06/19]
- 41 137. White NR, J.: Koeckeritz, J.: Munch, K.: Walter, P. Going forward: family resiliency in  
42 patients on hemodialysis. *J Fam Nurs* 2004;10(3):357-78.
- 43 138. Heiwe S, Dahlgren MA. Living with chronic renal failure: Coping with physical activities  
44 of daily living. *Adv Physiother* 2009;6(4):147-57. doi: 10.1080/14038190410019540
- 45 139. Rabiei L, Eslami AA, Abedi H, et al. Caring in an atmosphere of uncertainty: perspectives  
46 and experiences of caregivers of peoples undergoing haemodialysis in Iran. *Scand J*  
47 *Caring Sci* 2016;30(3):594-601. doi: 10.1111/scs.12283 [published Online First:  
48 2015/11/20]
- 49 140. Shahgholian N, Yousefi H. Supporting hemodialysis patients: A phenomenological study.  
50 *Iran J Nurs Midwifery Res* 2015;20(5):626-33. doi: 10.4103/1735-9066.164514  
51 [published Online First: 2015/10/13]
- 52  
53  
54  
55  
56  
57  
58  
59  
60

- 1  
2  
3 141. Yeun EJ, Bang HY, Kim EJ, et al. Attitudes toward stress and coping among primary  
4 caregivers of patients undergoing hemodialysis: A Q-methodology study. *Hemodial*  
5 *Int* 2016;20(3):453-62. doi: 10.1111/hdi.12404 [published Online First: 2016/02/03]  
6 142. Yumang MJ, Hammond L, Filteau N, et al. Perceptions of risk for foot problems and foot  
7 care practices of patients on hemodialysis. *Nephrol Nurs J* 2009;36(5):509-16.  
8 [published Online First: 2009/10/28]  
9 143. Barbosa GdS, Valadares GV. Hemodialysis: patient's adaptation and life style. *Acta Paul*  
10 *Enferm* 2009;22(Especial Nefrologia):524-27.  
11 144. Calvey D, Mee L. The lived experience of the person dependent on haemodialysis.  
12 *Journal of renal care* 2011;37(4):201-7. doi: 10.1111/j.1755-6686.2011.00235.x  
13 [published Online First: 2011/11/01]  
14 145. Krespi R, Bone M, Ahmad R, et al. Haemodialysis patients' beliefs about renal failure  
15 and its treatment. *Patient Educ Couns* 2004;53(2):189-96. doi: 10.1016/s0738-  
16 3991(03)00147-2  
17 146. Cox KJ, Parshall MB, Hernandez SHA, et al. Symptoms among patients receiving in-  
18 center hemodialysis: A qualitative study. *Hemodialysis International* 2016;00(00):00-  
19 00.  
20 147. Machado LRC, Car MR. A dialectic of patients' daily life with chronic renal failure in  
21 hemodialysis: the unavoidable and the casual. *Rev Esc Enferm USP* 2003;37(3):27-35.  
22 148. Moran A, Scott PA, Darbyshire P. Existential boredom: the experience of living on  
23 haemodialysis therapy. *Med Humanit* 2009;35(2):70-5. doi:  
24 10.1136/jmh.2009.001511 [published Online First: 2009/12/01]  
25 149. Krespi Boothby MR, Salmon P. [Self-efficacy and hemodialysis treatment: a qualitative  
26 and quantitative approach]. *Turk Psikiyatri Derg* 2013;24(2):84-93. [published Online  
27 First: 2013/06/12]  
28 150. Tong A, Palmer S, Manns B, et al. The beliefs and expectations of patients and  
29 caregivers about home haemodialysis: an interview study. *BMJ Open*  
30 2013;3(1):e002148. doi: 10.1136/bmjopen-2012-002148 [published Online First:  
31 2013/01/29]  
32 151. Torchi TS, Araujo STCd, Guimarães AM, A. G. M., et al. Clinical conditions and health  
33 care demand behavior of chronic renal patients. *Acta Paul Enferm* 2014;27(6):585-  
34 90. doi: 10.1590/1982-  
35 152. Cadena DMaGn, Hoyos GPAb, Atilano BF, et al. Anchored to a machine: Experiences of  
36 patients with chronic kidney disease. *Revista CONAMED* 2015;20(S1):16-20.  
37 153. Reis CKd, Guirardello EidB, Campos CJG. The person with renal chronic disease and  
38 caring demands. *Rev Bras Enferm* 2008;61(3):336-41.  
39 154. Baillie J, Lankshear A. Patient and family perspectives on peritoneal dialysis at home:  
40 findings from an ethnographic study. *J Clin Nurs* 2015;24(1-2):222-34. doi:  
41 10.1111/jocn.12663 [published Online First: 2014/09/27]  
42 155. Baillie J, Lankshear A. Patients' and relatives' experiences of peritonitis when using  
43 peritoneal dialysis. *Journal of Renal Care* 2015;41(3):177-86. doi: 10.1111/jorc.12118  
44 156. Xi W, Singh PM, Harwood L, et al. Patient experiences and preferences on short daily  
45 and nocturnal home hemodialysis. *Hemodial Int* 2013;17(2):201-7. doi:  
46 10.1111/j.1542-4758.2012.00731.x [published Online First: 2012/08/14]  
47 157. Giles S. Transformations: A Phenomenological Investigation into the Life-World of  
48 Home Haemodialysis. *Soc Work Health Care* 2004;38(2):29-50. doi:  
49 10.1300/J010v38n02\_02  
50 158. Giles S. Struggles between the body and machine: the paradox of living with a home  
51 haemodialysis machine. *Soc Work Health Care* 2005;41(2):19-35. doi:  
52 10.1300/J010v41n02\_02 [published Online First: 2005/07/29]  
53  
54  
55  
56  
57  
58  
59  
60



- 1  
2  
3 159. Low J, Myers J, Smith G, et al. The experiences of close persons caring for people with  
4 chronic kidney disease stage 5 on conservative kidney management: contested  
5 discourses of ageing. *Health (London)* 2014;18(6):613-30. doi:  
6 10.1177/1363459314524805 [published Online First: 2014/04/04]  
7 160. Santos FKd, Valadares GV. Living between the nightmare and the awakening - the first  
8 time in dealing with peritoneal dialysis. *Escola Anna Nery - Revista de Enfermagem*  
9 2011;15(1):39-46.  
10 161. McCarthy A, Shaban R, Boys J, et al. Compliance, normality, and the patient on  
11 peritoneal dialysis. *Nephrol Nurs J* 2010;37(3):243-50; quiz 51. [published Online  
12 First: 2010/07/16]  
13 162. Chong HJ, Kim HK, Kim SR, et al. Waiting for a kidney transplant: the experience of  
14 patients with end-stage renal disease in South Korea. *J Clin Nurs* 2016;25(7-8):930-9.  
15 doi: 10.1111/jocn.13107 [published Online First: 2016/03/21]  
16 163. Flores RV, Thome EG. [Feelings of patients on the waiting list for a kidney transplant].  
17 *Rev Bras Enferm* 2004;57(6):687-90. [published Online First: 2005/07/29]  
18 164. Kierans C. Narrating kidney disease: the significance of sensation and time in the  
19 emplotment of patient experience. *Cult Med Psychiatry* 2005;29(3):341-59. doi:  
20 10.1007/s11013-005-9171-8 [published Online First: 2006/01/13]  
21 165. Kierans CM, Maynooth NUI. Sensory and narrative identity: The narration of illness  
22 process among chronic renal sufferers in Ireland. *Anthropol Med* 2010;8(2-3):237-  
23 53. doi: 10.1080/13648470120101381  
24 166. Knihns NdS, Sartori DL, Zink V, et al. The experience of patients who need renal  
25 transplantation while waiting for a compatible organ. *Text Context Nursing*  
26 2013;22(4):1160-68.  
27 167. Lawrence C, Sharma S, Da Silva-Gane M, et al. Exploring the views of patients not on the  
28 transplant waiting list: a qualitative study. *Journal of renal care* 2013;39(2):118-24.  
29 doi: 10.1111/j.1755-6686.2013.12012.x [published Online First: 2013/05/21]  
30 168. Lopes SGR, Silva DMGVd. Narratives of women on hemodialysis: waiting for a kidney  
31 transplant. *Texto & Contexto - Enfermagem* 2014;23(3):680-87. doi: 10.1590/0104-  
32 07072014002540013  
33 169. Spiers J, Smith JA. Waiting for a kidney from a deceased donor: an interpretative  
34 phenomenological analysis. *Psychol Health Med* 2016;21(7):836-44. doi:  
35 10.1080/13548506.2015.1112415 [published Online First: 2015/11/21]  
36 170. Wachterman MW, McCarthy EP, Marcantonio ER, et al. Mistrust, misperceptions, and  
37 miscommunication: a qualitative study of preferences about kidney transplantation  
38 among African Americans. *Transplant Proc* 2015;47(2):240-6. doi:  
39 10.1016/j.transproceed.2015.01.016 [published Online First: 2015/03/15]  
40 171. Allen D, Wainwright M, Hutchinson T. 'Non-compliance' as illness management:  
41 Hemodialysis patients' descriptions of adversarial patient-clinician interactions. *Soc*  
42 *Sci Med* 2011;73(1):129-34. doi: 10.1016/j.socscimed.2011.05.018 [published Online  
43 First: 2011/06/15]  
44 172. Sieverdes JC, Nemeth LS, Magwood GS, et al. African American kidney transplant  
45 patients' perspectives on challenges in the living donation process. *Prog Transplant*  
46 2015;25(2):164-75. doi: 10.7182/pit2015852 [published Online First: 2015/06/25]  
47 173. Boaz A, Morgan M. Working to establish 'normality' post-transplant: a qualitative study  
48 of kidney transplant patients. *Chronic Illn* 2014;10(4):247-58. doi:  
49 10.1177/1742395313504789 [published Online First: 2013/09/28]  
50 174. Goldade K, Sidhwani S, Patel S, et al. Kidney transplant patients' perceptions, beliefs,  
51 and barriers related to regular nephrology outpatient visits. *Am J Kidney Dis*  
52 2011;57(1):11-20. doi: 10.1053/j.ajkd.2010.08.023 [published Online First:  
53 2010/11/23]  
54  
55  
56  
57  
58  
59  
60

- 1  
2  
3 175. Spiers J, Smith JA, Drage M. A longitudinal interpretative phenomenological analysis of  
4 the process of kidney recipients' resolution of complex ambiguities within  
5 relationships with their living donors. *J Health Psychol* 2015 doi:  
6 10.1177/1359105315581070 [published Online First: 2015/05/02]  
7 176. Stanfill A, Bloodworth R, Cashion A. Lessons learned: experiences of gaining weight by  
8 kidney transplant recipients. *Prog Transplant* 2012;22(1):71-8. [published Online  
9 First: 2012/04/12]  
10 177. Tielen M, van Exel NJ, van Buren MC, et al. Attitudes towards medication non-  
11 adherence in elderly kidney transplant patients: a Q methodology study. *Nephrol*  
12 *Dial Transplant* 2011;26(5):1723-8. doi: 10.1093/ndt/gfq642 [published Online First:  
13 2010/10/14]  
14 178. Gordon EJ, Prohaska TR, Gallant MP, et al. Adherence to immunosuppression: a  
15 prospective diary study. *Transplant Proc* 2007;39(10):3081-5. doi:  
16 10.1016/j.transproceed.2007.02.100 [published Online First: 2007/12/20]  
17 179. Leung SS, Shiu AT. Experience of Hong Kong patients awaiting kidney transplantation in  
18 mainland China. *J Clin Nurs* 2007;16(11C):341-9. doi: 10.1111/j.1365-  
19 2702.2007.02070.x [published Online First: 2007/12/06]  
20 180. Orr A, Orr D, Willis S, et al. Patient perceptions of factors influencing adherence to  
21 medication following kidney transplant. *Psychol Health Med* 2007;12(4):509-17. doi:  
22 10.1080/13548500701294556 [published Online First: 2007/07/11]  
23 181. Orr A, Willis S, Holmes M, et al. Living with a kidney transplant: a qualitative  
24 investigation of quality of life. *J Health Psychol* 2007;12(4):653-62. doi:  
25 10.1177/1359105307078172 [published Online First: 2007/06/23]  
26 182. Schipper K, Abma TA, Koops C, et al. Sweet and sour after renal transplantation: a  
27 qualitative study about the positive and negative consequences of renal  
28 transplantation. *Br J Health Psychol* 2014;19(3):580-91. doi: 10.1111/bjhp.12057  
29 [published Online First: 2013/07/06]  
30 183. Wiederhold D, Langer G, Landenberger M. Ambivalent lived experiences and instruction  
31 need of patients in the early period after kidney transplantation: a  
32 phenomenological study. *Nephrol Nurs J* 2011;38(5):417-23; quiz 24. [published  
33 Online First: 2011/10/29]  
34 184. Buldukoglu K, Kulakac O, Kececioglu N, et al. Recipients??? Perceptions of Their  
35 Transplanted Kidneys. *Transplantation* 2005;80(4):471-76. doi:  
36 10.1097/01.tp.0000168149.95310.6e  
37 185. Axelsson L, Randers I, Lundh Hagelin C, et al. Thoughts on death and dying when living  
38 with haemodialysis approaching end of life. *J Clin Nurs* 2012;21(15-16):2149-59. doi:  
39 10.1111/j.1365-2702.2012.04156.x [published Online First: 2012/07/14]  
40 186. Chatrungs C, Sorajjakool S, Amnatsatsue K. Wellness and Religious Coping Among Thai  
41 Individuals Living with Chronic Kidney Disease in Southern California. *J Relig Health*  
42 2015;54(6):2198-211. doi: 10.1007/s10943-014-9958-4 [published Online First:  
43 2014/10/11]  
44 187. Hain DJ, Wands L, Liehr P. Approaches to resolve health challenges in a population of  
45 older adults undergoing hemodialysis. *Res Gerontol Nurs* 2011;4(1):53-62. doi:  
46 10.3928/19404921-20100330-01 [published Online First: 2010/05/05]  
47 188. Lin CC, Han CY, Pan IJ. A qualitative approach of psychosocial adaptation process in  
48 patients undergoing long-term hemodialysis. *Asian Nurs Res (Korean Soc Nurs Sci)*  
49 2015;9(1):35-41. doi: 10.1016/j.anr.2014.10.007 [published Online First:  
50 2015/04/02]  
51 189. Rodrigues DFD, Schwartz E, Santana MdG, et al. Experience of men undergoing  
52 hemodialysis about their sexuality. *Avengerm* 2011;XXIX(2):255-62.  
53  
54  
55  
56  
57  
58  
59  
60

- 1  
2  
3 190. Tanyi RA, Werner JS. Women's experience of spirituality within end-stage renal disease  
4 and hemodialysis. *Clin Nurs Res* 2008;17(1):32-49. doi: 10.1177/1054773807311691  
5 [published Online First: 2008/01/11]
- 6 191. Tanyi RA, Werner JS. Toward a trajectory of adjustment in women with end-stage renal  
7 disease on haemodialysis. *J Clin Nurs* 2008;17(5A):43-50. doi: 10.1111/j.1365-  
8 2702.2007.02199.x [published Online First: 2008/03/14]
- 9 192. Martin-McDonald K. Being dialysis-dependent: a qualitative perspective. *Collegian*  
10 2003;10(2):29-33.
- 11 193. Martin-McDonald K. Dialysis-dependency: the reformulated or remnant person.  
12 *Contemp Nurse* 2003;16(1-2):151-60. [published Online First: 2004/03/05]
- 13 194. Niu H-y, Liu J-f. The psychological trajectory from diagnosis to approaching end of life in  
14 patients undergoing hemodialysis in China: A qualitative study. *International Journal*  
15 *of Nursing Sciences* 2017;4(1):29-33. doi: 10.1016/j.ijnss.2016.10.006
- 16 195. Bennett PN, Bonner A, Andrew J, et al. Using images to communicate the hidden  
17 struggles of life on dialysis. *Journal of Communication in Healthcare* 2013;6(1):12-21.  
18 doi: 10.1179/1753807613y.0000000031
- 19 196. Costa FG, Coutinho MdPdL, Santana IOd. Insuficiência renal crônica: representações  
20 sociais de pacientes com e sem depressão. *Psico-USF* 2014;19(3):387-98. doi:  
21 10.1590/1413-82712014019003002
- 22 197. Yodchai K, Dunning T, Hutchinson AM, et al. How do Thai patients with end stage renal  
23 disease adapt to being dependent on haemodialysis? A pilot study. *Journal of renal*  
24 *care* 2011:216-23.
- 25 198. Arslan SY, Ege E. Sexual Experiences of Women Exposed to Hemodialysis Treatment. *Sex*  
26 *Disabil* 2009;27(4):215-21. doi: 10.1007/s11195-009-9132-1
- 27 199. Ladin K, Lin N, Hahn E, et al. Engagement in decision-making and patient satisfaction: a  
28 qualitative study of older patients' perceptions of dialysis initiation and modality  
29 decisions. *Nephrol Dial Transplant* 2016 doi: 10.1093/ndt/gfw307 [published Online  
30 First: 2016/09/01]
- 31 200. Erlang AS, Nielsen IH, Hansen HO, et al. Patients Experiences of Involvement in Choice  
32 of Dialysis Mode. *Journal of renal care* 2015;41(4):260-7. doi: 10.1111/jorc.12141  
33 [published Online First: 2015/09/30]
- 34 201. Moran A, Scott AP, Darbyshire P. Communicating with nurses: patients' views on  
35 effective support while on haemodialysis. *Nurs Times* 2009;105(25):42146.
- 36 202. Mitchell A, Farrand P, James H, et al. Patients' experience of transition onto  
37 haemodialysis: a qualitative study. *Journal of renal care* 2009;35(2):99-107. doi:  
38 10.1111/j.1755-6686.2009.00094.x [published Online First: 2009/05/13]
- 39 203. Schober GS, Wenger JB, Lee CC, et al. Dialysis Patient Perspectives on CKD Advocacy: A  
40 Semistructured Interview Study. *Am J Kidney Dis* 2017;69(1):29-40. doi:  
41 10.1053/j.ajkd.2016.06.018 [published Online First: 2016/08/25]
- 42 204. Smith K, Coston M, Glock K, et al. Patient perspectives on fluid management in chronic  
43 hemodialysis. *J Ren Nutr* 2010;20(5):334-41. doi: 10.1053/j.jrn.2009.09.001  
44 [published Online First: 2009/11/17]
- 45 205. Pietrovski V, Dall'Agnol CM. Situações significantes no espaço-contexto da hemodiálise:  
46 o que dizem os usuários de um serviço? *Rev Bras Enferm* 2006;59(5):630-35.
- 47 206. Malheiro Oliveira P, Arruda Soares D. Percepciones de las personas con insuficiencia  
48 renal crónica sobre la calidad de vida. *Enfermería Global* 2012;257-275(28)
- 49 207. Beanlands H, Horsburgh ME, Fox S, et al. Caregiving by family and friends of adults  
50 receiving dialysis. *Nephrol Nurs J* 2005;32(6):621-31. [published Online First:  
51 2006/01/24]
- 52  
53  
54  
55  
56  
57  
58  
59  
60

- 1  
2  
3 208. Ziegert K, Fridlund B, Lidell E. Health in everyday life among spouses of haemodialysis  
4 patients: a content analysis. *Scand J Caring Sci* 2006;20(2):223-8. doi:  
5 10.1111/j.1471-6712.2006.00400.x [published Online First: 2006/06/08]  
6 209. Ziegert K, Fridlund B, Lidell E. "Time for dialysis as time to live": experiences of time in  
7 everyday life of the Swedish next of kin of hemodialysis patients. *Nurs Health Sci*  
8 2009;11(1):45-50. doi: 10.1111/j.1442-2018.2009.00429.x [published Online First:  
9 2009/03/21]  
10 210. Zeiegert K, Fridlund B. Conceptions of life situation among next-of-kin of haemodialysis  
11 patients. *J Nurs Manag* 2001;9(4):231-39.  
12 211. Eslami AA, Rabiei L, Abedi HA, et al. Coping skills of Iranian family careivers in caretaking  
13 of patients undergoing haemodialysis: a qualitative study. *Journal of renal care*  
14 2016;XX(X):1-10.  
15 212. Taylor F, Gutteridge R, Willis C. Peer support for CKD patients and carers: overcoming  
16 barriers and facilitating access. *Health Expect* 2016;19(3):617-30. doi:  
17 10.1111/hex.12348 [published Online First: 2015/02/05]  
18 213. Tavares JM, Lisboa MT, Ferreira MA, et al. Peritoneal dialysis: family care for chronic  
19 kidney disease patients in home-based treatment. *Rev Bras Enferm* 2016;69(6):1172-  
20 78. doi: 10.1590/0034-7167-2016-0262 [published Online First: 2016/12/08]  
21 214. Lovink MH, Kars MC, de Man-van Ginkel JM, et al. Patients' experiences of safety during  
22 haemodialysis treatment--a qualitative study. *J Adv Nurs* 2015;71(10):2374-83. doi:  
23 10.1111/jan.12690 [published Online First: 2015/05/28]  
24 215. Nagpal N, Boutin-Foster C, Melendez J, et al. Experiences of patients undergoing dialysis  
25 who are from ethnic and racial minorities. *Journal of renal care* 2017;43(1):29-36.  
26 doi: 10.1111/jorc.12185 [published Online First: 2016/12/16]  
27 216. Cramm JM, Leensvaart L, Berghout M, et al. Exploring views on what is important for  
28 patient-centred care in end-stage renal disease using Q methodology. *BMC Nephrol*  
29 2015;16(74):74. doi: 10.1186/s12882-015-0071-z [published Online First:  
30 2015/05/29]  
31 217. Namiki S, Rowe J, Cooke M. Living with home-based haemodialysis: insights from older  
32 people. *J Clin Nurs* 2010;19(3-4):547-55. doi: 10.1111/j.1365-2702.2009.02901.x  
33 [published Online First: 2009/11/06]  
34 218. DePasquale N, Ephraim PL, Ameling J, et al. Selecting renal replacement therapies: what  
35 do African American and non-African American patients and their families think  
36 others should know? A mixed methods study. *BMC Nephrol* 2013;14:9. doi:  
37 10.1186/1471-2369-14-9 [published Online First: 2013/01/16]  
38 219. Sahaf RP, Sadat Ilali EPS, Peyrovi HP, et al. Uncertainty, the Overbearing Lived  
39 Experience of the Elderly People Undergoing Hemodialysis: A Qualitative Study. *Int J*  
40 *Community Based Nurs Midwifery* 2017;5(1):13-21. [published Online First:  
41 2017/01/18]  
42 220. Lee A, Gudex C, Povlsen JV, et al. Patients' views regarding choice of dialysis modality.  
43 *Nephrol Dial Transplant* 2008;23(12):3953-9. doi: 10.1093/ndt/gfn365 [published  
44 Online First: 2008/07/01]  
45 221. Piccoli GB, Consiglio V, Deagostini MC, et al. Starting together: a focus group for the  
46 organization of a CKD outpatient care unit. *Journal of nephrology* 2010;23(6):699-  
47 704. [published Online First: 2010/04/13]  
48 222. Pilger C, Rampari EM, Waidman MAP, et al. Hemodialysis: its meaning and impact in the  
49 elderly life. *Escola Anna Nery - Revista de Enfermagem* 2010;14(4):677-83.  
50 223. Browne T, Amamoo A, Patzer RE, et al. Everybody needs a cheerleader to get a kidney  
51 transplant: a qualitative study of the patient barriers and facilitators to kidney  
52 transplantation in the Southeastern United States. *BMC Nephrol* 2016;17(1):108.  
53 doi: 10.1186/s12882-016-0326-3 [published Online First: 2016/08/01]  
54  
55  
56  
57  
58  
59  
60

- 1  
2  
3 224. Hollingdale R, Sutton D, Hart K. Facilitating dietary change in renal disease: investigating  
4 patients' perspectives. *Journal of renal care* 2008;34(3):136-42. doi: 10.1111/j.1755-  
5 6686.2008.00034.x [published Online First: 2008/09/13]
- 6 225. Marques FRB, Botelho MR, Marcon SS, et al. Coping strategies used by family members  
7 of individuals receiving hemodialysis. *Texto & Contexto - Enfermagem*  
8 2014;23(4):915-24. doi: 10.1590/0104-07072014002220011
- 9 226. Russ AJ, Shim JK, Kaufman SR. Is there life on dialysis?: time and aging in a clinically  
10 sustained existence. *Med Anthropol* 2005;24(4):297-324.
- 11 227. Winterbottom A, Bekker HL, Conner M, et al. Choosing dialysis modality: decision  
12 making in a chronic illness context. *Health Expect* 2014;17(5):710-23. doi:  
13 10.1111/j.1369-7625.2012.00798.x [published Online First: 2012/07/04]
- 14 228. Davison SN. Facilitating advance care planning for patients with end-stage renal  
15 disease: the patient perspective. *Clin J Am Soc Nephrol* 2006;1(5):1023-8. doi:  
16 10.2215/CJN.01050306 [published Online First: 2007/08/19]
- 17 229. Iles-Smith H. Perceptions and experiences of pre-dialysis patients. *EDTNA/ERCA journal*  
18 2005;31(3):130-3. [published Online First: 2005/12/21]
- 19 230. Wilkinson E, Randhawa G, Brown EA, et al. Communication as care at end of life: an  
20 emerging issue from an exploratory action research study of renal end-of-life care  
21 for ethnic minorities in the UK. *Journal of renal care* 2014;40 Suppl 1:23-9. doi:  
22 10.1111/jorc.12084 [published Online First: 2014/09/05]
- 23 231. Campos CJG, Turato ER. The professional health team, the renal patient undergoing  
24 hemodialysis and interpersonal relationships. *Rev Bras Enferm* 2003;56(5):508-12.
- 25 232. Bailey PK, Ben-Shlomo Y, de Salis I, et al. Better the donor you know? A qualitative  
26 study of renal patients' views on 'altruistic' live-donor kidney transplantation. *Soc Sci*  
27 *Med* 2016;150:104-11. doi: 10.1016/j.socscimed.2015.12.041 [published Online  
28 First: 2016/01/09]
- 29 233. Nygardh A, Malm D, Wikby K, et al. The experience of empowerment in the patient-  
30 staff encounter: the patient's perspective. *J Clin Nurs* 2012;21(5-6):897-904. doi:  
31 10.1111/j.1365-2702.2011.03901.x [published Online First: 2011/11/16]
- 32 234. Tong A, Gow K, Wong G, et al. Patient perspectives of a young adult renal clinic: a  
33 mixed-methods evaluation. *Nephrology* 2015;20(5):352-9. doi: 10.1111/nep.12396  
34 [published Online First: 2015/02/03]
- 35 235. Bridger J. Enabling patients with chronic kidney disease to self-care. *Journal of Renal*  
36 *Nursing* 2009;1(4):173-78.
- 37 236. Ghadami A, Memarian R, Mohamadi E, et al. Patients' experiences from their received  
38 education about the process of kidney transplant: A qualitative study. *Iran J Nurs*  
39 *Midwifery Res* 2012;17(2 Sup1):157-64.
- 40 237. Haspesslagh A, De Bondt K, Kuypers D, et al. Completeness and satisfaction with the  
41 education and information received by patients immediately after kidney transplant:  
42 a mixed-models study. *Prog Transplant* 2013;23(1):12-22. doi: 10.7182/pit2013249  
43 [published Online First: 2013/03/02]
- 44 238. Russell CL, Kilburn E, Conn VS, et al. Medication-taking beliefs of adult renal transplant  
45 recipients. *Clin Nurse Spec* 2003;17(4):200-8; quiz 09-30. [published Online First:  
46 2003/07/19]
- 47 239. Urstad KH, Wahl AK, Andersen MH, et al. Renal recipients' educational experiences in  
48 the early post-operative phase--a qualitative study. *Scand J Caring Sci*  
49 2012;26(4):635-42. doi: 10.1111/j.1471-6712.2012.00972.x [published Online First:  
50 2012/03/16]
- 51 240. Calestani M, Tonkin-Crine S, Pruthi R, et al. Patient attitudes towards kidney transplant  
52 listing: qualitative findings from the ATTOM study. *Nephrol Dial Transplant*  
53 2014;29(11):2144-50. doi: 10.1093/ndt/gfu188 [published Online First: 2014/07/06]
- 54  
55  
56  
57  
58  
59  
60



- 1  
2  
3 241. Ros RL, Kucirka LM, Govindan P, et al. Patient attitudes toward CDC high infectious risk  
4 donor kidney transplantation: inferences from focus groups. *Clin Transplant*  
5 2012;26(2):247-53. doi: 10.1111/j.1399-0012.2011.01469.x [published Online First:  
6 2011/05/11]
- 7 242. Sheu J, Ephraim PL, Powe NR, et al. African American and non-African American  
8 patients' and families' decision making about renal replacement therapies. *Qual*  
9 *Health Res* 2012;22(7):997-1006. doi: 10.1177/1049732312443427 [published  
10 Online First: 2012/05/31]
- 11 243. Bath J, Tonks S, Edwards P. Psychological care of the haemodialysis patient.  
12 *EDTNA/ERCA journal* 2003;29(2):85-8. [published Online First: 2003/11/06]
- 13 244. Thomé EGdR, Meyer DEE. Women caregivers for men with chronic kidney disease: a  
14 cultural approach. *Text Context Nursing* 2011;20(3):503-11.
- 15 245. Weil CM. Exploring hope in patients with end stage renal disease on chronic  
16 hemodialysis. *Nephrol Nurs J* 2000;27(2):219-24. [published Online First:  
17 2000/12/09]
- 18 246. Wells SA. Occupational Deprivation or Occupational Adaptation of Mexican Americans  
19 on Renal Dialysis. *Occup Ther Int* 2015;22(4):174-82. doi: 10.1002/oti.1394  
20 [published Online First: 2015/06/09]
- 21 247. Wilson PM, Reston JD, Bieraugel R, et al. You cannot choose your family: sociological  
22 ambivalence in the hemodialysis unit. *Qual Health Res* 2015;25(1):27-39. doi:  
23 10.1177/1049732314549030 [published Online First: 2014/09/11]
- 24 248. Lenci LT, Campbell JD. Peritoneal dialysis in elderly patients. *Adv Perit Dial* 2012;28:79-  
25 83. [published Online First: 2013/01/15]
- 26 249. Walton J. Prayer warriors: a grounded theory study of American Indians receiving  
27 hemodialysis. *Nephrol Nurs J* 2007;34(4):377-86; quiz 87.
- 28 250. Yodchai K, Dunning T, Savage S, et al. The role of religion and spirituality in coping with  
29 kidney disease and haemodialysis in Thailand. *Scand J Caring Sci* 2017;31(2):359-67.  
30 doi: 10.1111/scs.12355 [published Online First: 2016/06/22]
- 31 251. Walton J. Finding a balance: a grounded theory study of spirituality in hemodialysis  
32 patients. *Nephrol Nurs J* 2002;29(5):447-56; discussion 57. [published Online First:  
33 2002/11/19]
- 34 252. Santos Bpd, Schwartz E, Beuter M, et al. Consequences attributed to kidney  
35 transplantation: critical incident technique. *Texto & Contexto - Enfermagem*  
36 2015;24(3):748-55. doi: 10.1590/0104-07072015000270014
- 37 253. Ravenscroft EF. Diabetes and kidney failure: how individuals with diabetes experience  
38 kidney failure. *Nephrol Nurs J* 2005;32(4):502-10.
- 39 254. Williams AF, Manias E, Walker R. The role of irrational thought in medicine adherence:  
40 people with diabetic kidney disease. *J Adv Nurs* 2009;65(10):2108-17. doi:  
41 10.1111/j.1365-2648.2009.05077.x [published Online First: 2009/08/14]
- 42 255. Calvin AO. Haemodialysis patients and end-of-life decisions: a theory of personal  
43 preservation. *J Adv Nurs* 2004;46(5):558-66. doi: 10.1111/j.1365-2648.2004.03030.x  
44 [published Online First: 2004/05/14]
- 45 256. Aasen EM, Kvangarsnes M, Wold B, et al. The next of kin of older people undergoing  
46 haemodialysis: a discursive perspective on perceptions of participation. *J Adv Nurs*  
47 2012;68(8):1716-25. doi: 10.1111/j.1365-2648.2011.05854.x [published Online First:  
48 2011/10/18]
- 49 257. Lindberg MBcm-A, Helena: LindstrÅ¶m, Rosmarie: Lindberg, Maria. Dry weight from the  
50 haemodialysis patient perspective. 2013;9(2):68-73.
- 51 258. Vestman C, Hasselroth M, Berglund M. Freedom and confinement: patients'  
52 experiences of life with home haemodialysis. *Nurs Res Pract* 2014;2014:252643. doi:  
53 10.1155/2014/252643 [published Online First: 2015/01/15]
- 54  
55  
56  
57  
58  
59  
60

- 1  
2  
3 259. Curtin RB, Mapes D, Petillo M, et al. Long-term dialysis survivors: a transformational  
4 experience. *Qual Health Res* 2002;12(5):609-24. doi: 10.1177/104973202129120133  
5 [published Online First: 2002/05/08]
- 6 260. Curtin RB, Mapes DL. Health care management strategies of long-term dialysis  
7 survivors. *Nephrol Nurs J* 2001;28(4):385-92; discussion 93-4. [published Online First:  
8 2002/07/30]
- 9 261. Lederer S, Fischer MJ, Gordon HS, et al. Barriers to effective communication between  
10 veterans with chronic kidney disease and their healthcare providers. *Clin Kidney J*  
11 2015;8(6):766-71. doi: 10.1093/ckj/sfv079 [published Online First: 2015/11/28]
- 12 262. McKillop G, Joy J. Patients' experience and perceptions of polypharmacy in chronic  
13 kidney disease and its impact on adherent behaviour. *Journal of renal care*  
14 2013;39(4):200-7. doi: 10.1111/j.1755-6686.2013.12037.x [published Online First:  
15 2013/11/20]
- 16 263. Reid K, Morris M, Cormack M, et al. Exploring the process of adjusting to diabetic  
17 kidney disease. *Journal of renal care* 2012;38 Suppl 1:30-9. doi: 10.1111/j.1755-  
18 6686.2012.00278.x [published Online First: 2012/03/01]
- 19 264. Ladin K, Buttafarro K, Hahn E, et al. "End-of-Life Care? I'm not Going to Worry About  
20 That Yet." Health Literacy Gaps and End-of-Life Planning Among Elderly Dialysis  
21 Patients. *Gerontologist* 2017;00(00):1-10. doi: 10.1093/geront/gnw267 [published  
22 Online First: 2017/03/23]
- 23 265. Harwood L, Clark AM. Dialysis modality decision-making for older adults with chronic  
24 kidney disease. *J Clin Nurs* 2014;23(23-24):3378-90. doi: 10.1111/jocn.12582  
25 [published Online First: 2014/03/22]
- 26 266. Llewellyn H, Low J, Smith G, et al. Narratives of continuity among older people with late  
27 stage chronic kidney disease who decline dialysis. *Soc Sci Med* 2014;114:49-56. doi:  
28 10.1016/j.socscimed.2014.05.037 [published Online First: 2014/06/10]
- 29 267. Schell JO, Patel UD, Steinhauer KE, et al. Discussions of the kidney disease trajectory by  
30 elderly patients and nephrologists: a qualitative study. *Am J Kidney Dis*  
31 2012;59(4):495-503. doi: 10.1053/j.ajkd.2011.11.023 [published Online First:  
32 2012/01/10]
- 33 268. Walker RC, Morton RL, Tong A, et al. Patient and caregiver preferences for home  
34 dialysis-the home first study: a protocol for qualitative interviews and discrete  
35 choice experiments. *BMJ Open* 2015;5(4):e007405. doi: 10.1136/bmjopen-2014-  
36 007405 [published Online First: 2015/04/17]
- 37 269. Landreneau KJ, Smith PW. Patients' perceptions concerning choice among renal  
38 replacement therapies: A pilot study. *Nephrol Nurs J* 2006;33(4):397-402.
- 39 270. Shaw R. Being-in-dialysis: The experience of the machine-body for home dialysis users.  
40 *Health (London)* 2015;19(3):229-44. doi: 10.1177/1363459314539775 [published  
41 Online First: 2014/06/21]
- 42 271. Harwood L, Locking-Cusolito H, Spittal J, et al. Preparing for hemodialysis: patient  
43 stressors and responses. *Nephrol Nurs J* 2005;32(3):295-302; quiz 03. [published  
44 Online First: 2005/07/23]
- 45 272. Visser A, Dijkstra GJ, Kuiper D, et al. Accepting or declining dialysis: considerations  
46 taken into account by elderly patients with end-stage renal disease. *J Nephrol*  
47 2009;22(6):794-99.
- 48 273. de Rosenroll A, Higuchi KS, Dutton KS, et al. Perspectives of significant others in dialysis  
49 modality decision-making: a qualitative study. *CANNT journal = Journal ACITN*  
50 2013;23(4):17-24. [published Online First: 2014/03/26]
- 51 274. Landreneau KJ, Ward-Smith P. Perceptions of Adult Patients on Hemodialysis  
52 Concerning Choice Among Renal Replacement Therapies. *Nephrol Nurs J*  
53 2007;34(5):513-19.  
54  
55  
56  
57  
58  
59  
60

- 1  
2  
3 275. Cases A, Dempster M, Davies M, et al. The experience of individuals with renal failure  
4 participating in home haemodialysis: an interpretative phenomenological analysis. *J*  
5 *Health Psychol* 2011;16(6):884-94. doi: 10.1177/1359105310393541 [published  
6 Online First: 2011/03/31]
- 7 276. Lindsay H, MacGregor C, Fry M. The experience of living with chronic illness for the  
8 haemodialysis patient: An interpretative phenomenological analysis. *Health Sociol*  
9 *Rev* 2014;23(3):232-41.
- 10 277. Darrell L. Faith that God cares: the experience of spirituality with African American  
11 hemodialysis patients. *Social Work & Christianity* 2016;43(2):189-212.
- 12 278. Hagren B, Pettersen I-M, Severinsson E, et al. The haemodialysis machine as a lifeline:  
13 experiences of suffering from end-stage renal disease. *J Adv Nurs* 2001;34(2):196-  
14 202. doi: 10.1046/j.1365-2648.2001.01745.x
- 15 279. Harrington J, Morgan M. Understanding kidney transplant patients' treatment choices:  
16 The interaction of emotion with medical and social influences on risk preferences.  
17 *Soc Sci Med* 2016;155:43-50. doi: 10.1016/j.socscimed.2016.02.027 [published  
18 Online First: 2016/03/18]
- 19 280. Herlin C, Wann-Hansson C. The experience of being 30-45 years of age and depending  
20 on haemodialysis treatment: a phenomenological study. *Scand J Caring Sci*  
21 2010;24(4):693-9. doi: 10.1111/j.1471-6712.2009.00764.x [published Online First:  
22 2010/04/23]
- 23 281. Lewis H, Arber S. The role of the body in end-stage kidney disease in young adults:  
24 Gender, peer and intimate relationships. *Chronic Illn* 2015;11(3):184-97. doi:  
25 10.1177/1742395314566823 [published Online First: 2015/01/16]
- 26 282. Pelletier-Hibbert M, Sohi P. Sources of uncertainty and coping strategies used by family  
27 members of individuals living with end stage renal disease. *Nephrol Nurs J*  
28 2001;28(4):411-9.
- 29 283. Goff SL, Eneanya ND, Feinberg R, et al. Advance care planning: a qualitative study of  
30 dialysis patients and families. *Clin J Am Soc Nephrol* 2015;10(3):390-400. doi:  
31 10.2215/CJN.07490714 [published Online First: 2015/02/15]
- 32 284. Nygardh A, Wikby K, Malm D, et al. Empowerment in outpatient care for patients with  
33 chronic kidney disease - from the family member's perspective. *BMC Nurs*  
34 2011;10(21):21. doi: 10.1186/1472-6955-10-21 [published Online First: 2011/11/01]
- 35 285. Hutchison LA, Raffin-Bouchal DS, Syme CA, et al. Readiness to participate in advance  
36 care planning: A qualitative study of renal failure patients, families and healthcare  
37 providers. *Chronic Illn* 2017;13(3):171-87. doi: 10.1177/1742395316675023  
38 [published Online First: 2017/01/31]
- 39 286. Davison SN, Simpson C. Hope and advance care planning in patients with end stage  
40 renal disease: qualitative interview study. *BMJ* 2006;333(7574):886. doi:  
41 10.1136/bmj.38965.626250.55 [published Online First: 2006/09/23]
- 42 287. Calvin AO, Engebretson JC, Sardual SA. Understanding of advance care planning by  
43 family members of persons undergoing hemodialysis. *West J Nurs Res*  
44 2014;36(10):1357-73. doi: 10.1177/0193945913514637 [published Online First:  
45 2013/12/12]
- 46 288. Noble H, Meyer J, Bridges J, et al. Reasons renal patients give for deciding not to  
47 dialyze: A prospective qualitative interview study. *Dial Transplant* 2009;38(3):1-5.
- 48 289. Molzahn A, Sheilds L, Bruce A, et al. Perceptions Regarding Death and Dying of  
49 Individuals with Chronic Kidney Disease. *Nephrol Nurs J* 2012;39(3):197-204.
- 50 290. Casey JR, Hanson CS, Winkelmayr WC, et al. Patients' perspectives on hemodialysis  
51 vascular access: a systematic review of qualitative studies. *Am J Kidney Dis*  
52 2014;64(6):937-53. doi: 10.1053/j.ajkd.2014.06.024 [published Online First:  
53 2014/08/15]
- 54  
55  
56  
57  
58  
59  
60



- 1  
2  
3 291. Jamieson NJ, Hanson CS, Josephson MA, et al. Motivations, Challenges, and Attitudes to  
4 Self-management in Kidney Transplant Recipients: A Systematic Review of  
5 Qualitative Studies. *Am J Kidney Dis* 2016;67(3):461-78. doi:  
6 10.1053/j.ajkd.2015.07.030 [published Online First: 2015/09/16]  
7 292. Palmer SC, Hanson CS, Craig JC, et al. Dietary and fluid restrictions in CKD: a thematic  
8 synthesis of patient views from qualitative studies. *Am J Kidney Dis* 2015;65(4):559-  
9 73. doi: 10.1053/j.ajkd.2014.09.012 [published Online First: 2014/12/03]  
10 293. Ralph A, Chapman JR, Gillis J, et al. Family perspectives on deceased organ donation:  
11 thematic synthesis of qualitative studies. *Am J Transplant* 2014;14(4):923-35. doi:  
12 10.1111/ajt.12660 [published Online First: 2014/03/13]  
13 294. Tong A, Brown MA, Winkelmayr WC, et al. Perspectives on Pregnancy in Women With  
14 CKD: A Semistructured Interview Study. *Am J Kidney Dis* 2015;66(6):951-61. doi:  
15 10.1053/j.ajkd.2015.08.023 [published Online First: 2015/10/11]  
16 295. Tong A, Chapman JR, Wong G, et al. The experiences of commercial kidney donors:  
17 thematic synthesis of qualitative research. *Transpl Int* 2012;25(11):1138-49. doi:  
18 10.1111/j.1432-2277.2012.01534.x [published Online First: 2012/07/27]  
19 296. Tong A, Cheung KL, Nair SS, et al. Thematic synthesis of qualitative studies on patient  
20 and caregiver perspectives on end-of-life care in CKD. *Am J Kidney Dis*  
21 2014;63(6):913-27. doi: 10.1053/j.ajkd.2013.11.017 [published Online First:  
22 2014/01/15]  
23 297. Tong A, Jesudason S, Craig JC, et al. Perspectives on pregnancy in women with chronic  
24 kidney disease: systematic review of qualitative studies. *Nephrol Dial Transplant*  
25 2015;30(4):652-61. doi: 10.1093/ndt/gfu378 [published Online First: 2014/12/20]  
26 298. Tong A, Lowe A, Sainsbury P, et al. Experiences of parents who have children with  
27 chronic kidney disease: a systematic review of qualitative studies. *Pediatrics*  
28 2008;121(2):349-60. doi: 10.1542/peds.2006-3470 [published Online First:  
29 2008/02/05]  
30 299. Tong A, Rangan GK, Ruospo M, et al. A painful inheritance-patient perspectives on living  
31 with polycystic kidney disease: thematic synthesis of qualitative research. *Nephrol*  
32 *Dial Transplant* 2015;30(5):790-800. doi: 10.1093/ndt/gfv010 [published Online  
33 First: 2015/02/01]  
34 300. Walker RC, Hanson CS, Palmer SC, et al. Patient and caregiver perspectives on home  
35 hemodialysis: a systematic review. *Am J Kidney Dis* 2015;65(3):451-63. doi:  
36 10.1053/j.ajkd.2014.10.020 [published Online First: 2015/01/15]  
37 301. Tong A, Hanson CS, Chapman JR, et al. 'Suspended in a paradox'-patient attitudes to  
38 wait-listing for kidney transplantation: systematic review and thematic synthesis of  
39 qualitative studies. *Transpl Int* 2015;28(7):771-87. doi: 10.1111/tri.12575 [published  
40 Online First: 2015/04/08]  
41 302. Bailey P, Tomson C, Risdale S, et al. From potential donor to actual donation: does  
42 socioeconomic position affect living kidney donation? A systematic review of the  
43 evidence. *Transplantation* 2014;98(9):918-26. doi: 10.1097/TP.0000000000000428  
44 [published Online First: 2014/09/25]  
45 303. Reid C, Seymour J, Jones C. A Thematic Synthesis of the Experiences of Adults Living  
46 with Hemodialysis. *Clin J Am Soc Nephrol* 2016;11(7):1206-18. doi:  
47 10.2215/CJN.10561015 [published Online First: 2016/06/02]  
48 304. Arokiasamy P, Uttamacharya U, Jain K, et al. The impact of multimorbidity on adult  
49 physical and mental health in low- and middle-income countries: what does the  
50 study on global ageing and adult health (SAGE) reveal? *BMC Med* 2015;13:178. doi:  
51 10.1186/s12916-015-0402-8 [published Online First: 2015/08/05]  
52 305. Kim TJ, Vonnelich N, Ludecke D, et al. Income, financial barriers to health care and  
53 public health expenditure: A multilevel analysis of 28 countries. *Soc Sci Med*  
54  
55  
56  
57  
58  
59  
60

- 2017;176:158-65. doi: 10.1016/j.socscimed.2017.01.044 [published Online First: 2017/02/06]
306. Mackenbach JP, Looman CW, Artnik B, et al. 'Fundamental causes' of inequalities in mortality: an empirical test of the theory in 20 European populations. *Social Health Illn* 2017 doi: 10.1111/1467-9566.12562 [published Online First: 2017/04/04]
307. Prasad N, Jha V. Hemodialysis in Asia. *Kidney Dis (Basel)* 2015;1(3):165-77. doi: 10.1159/000441816 [published Online First: 2016/08/19]
308. Rajapurkar MM, John GT, Kirpalani AL, et al. What do we know about chronic kidney disease in India: first report of the Indian CKD registry. *BMC Nephrol* 2012;13:10. doi: 10.1186/1471-2369-13-10 [published Online First: 2012/03/07]
309. Obrador GT, Rubilar X, Agazzi E, et al. The Challenge of Providing Renal Replacement Therapy in Developing Countries: The Latin American Perspective. *Am J Kidney Dis* 2016;67(3):499-506. doi: 10.1053/j.ajkd.2015.08.033 [published Online First: 2015/12/29]
310. Mackenbach JP. The persistence of health inequalities in modern welfare states: the explanation of a paradox. *Soc Sci Med* 2012;75(4):761-9. doi: 10.1016/j.socscimed.2012.02.031 [published Online First: 2012/04/06]
311. Rodriguez RA. Dialysis for undocumented immigrants in the United States. *Adv Chronic Kidney Dis* 2015;22(1):60-5. doi: 10.1053/j.ackd.2014.07.003 [published Online First: 2015/01/13]
312. Pavli A, Maltezos H. Health problems of newly arrived migrants and refugees in Europe. *J Travel Med* 2017;24(4) doi: 10.1093/jtm/tax016 [published Online First: 2017/04/21]
313. Matesanz R, Marazuela R, Dominguez-Gil B, et al. The 40 donors per million population plan: an action plan for improvement of organ donation and transplantation in Spain. *Transplant Proc* 2009;41(8):3453-6. doi: 10.1016/j.transproceed.2009.09.011 [published Online First: 2009/10/28]
314. Acevedo-Garcia D. Special Issue Introduction: Place, Migration and Health. *Soc Sci Med* 2012 doi: 10.1016/j.socscimed.2012.09.016
315. Terasaki G, Ahrenholz NC, Haider MZ. Care of Adult Refugees with Chronic Conditions. *Med Clin North Am* 2015;99(5):1039-58. doi: 10.1016/j.mcna.2015.05.006 [published Online First: 2015/09/01]
316. Van Biesen W, Vanholder R, Hernandez T, et al. Caring for Migrants and Refugees With End-Stage Kidney Disease in Europe. *Am J Kidney Dis* 2017 doi: 10.1053/j.ajkd.2017.10.015 [published Online First: 2017/12/25]
317. Raghavan R. Caring for Undocumented Immigrants With Kidney Disease. *Am J Kidney Dis* 2018;71(4):488-94. doi: 10.1053/j.ajkd.2017.09.011 [published Online First: 2017/12/05]
318. Wild V, Dawson A. Migration: a core public health ethics issue. *Public Health* 2018 doi: 10.1016/j.puhe.2018.02.023 [published Online First: 2018/04/03]
319. Chaves EdCL, Carvalho TPd, Carvalho CC, et al. Associação entre Bem-Estar Espiritual e Autoestima em Pessoas com Insuficiência Renal Crônica em Hemodiálise. *Psicologia: Reflexão e Crítica* 2015;28(4):737-43. doi: 10.1590/1678-7153.201528411
320. Cruz JP, Colet PC, Alquwez N, et al. Influence of religiosity and spiritual coping on health-related quality of life in Saudi haemodialysis patients. *Hemodial Int* 2017;21(1):125-32. doi: 10.1111/hdi.12441 [published Online First: 2016/06/23]
321. Saisunantararom W, Cheawchanwattana A, Kanjanabuch T, et al. Associations among Spirituality, Health-Related Quality of Life, and Depression in Pre-Dialysis Chronic Kidney Disease Patients: An Exploratory Analysis in Thai Buddhist Patients. *Religions* 2015;6(4):1249-62. doi: 10.3390/rel6041249

- 1  
2  
3 322. Tanyi RA, Werner JS, Recine ACG, et al. Perceptions of incorporating spirituality into  
4 their care: A phenomenological study of female patients on hemodialysis. *Nephrol*  
5 *Nurs J* 2006;33(5):532-38.
- 6 323. Lucchetti G, Almeida LGCd, Granero AL. Spirituality for dialysis patients: should the  
7 nephrologist address? *J Bras Nefrol* 2010;32(1):126-30.
- 8 324. Dwarswaard J, Bakker EJ, van Staa A, et al. Self-management support from the  
9 perspective of patients with a chronic condition: a thematic synthesis of qualitative  
10 studies. *Health Expect* 2016;19(2):194-208. doi: 10.1111/hex.12346 [published  
11 Online First: 2015/01/27]
- 12 325. Morton RL, Tong A, Howard K, et al. The views of patients and carers in treatment  
13 decision making for chronic kidney disease: systematic review and thematic  
14 synthesis of qualitative studies. *BMJ* 2010;340:c112. doi: 10.1136/bmj.c112  
15 [published Online First: 2010/01/21]
- 16 326. Shommu NS, Ahmed S, Rumana N, et al. What is the scope of improving immigrant and  
17 ethnic minority healthcare using community navigators: A systematic scoping  
18 review. *Int J Equity Health* 2016;15:6. doi: 10.1186/s12939-016-0298-8 [published  
19 Online First: 2016/01/16]
- 20 327. Boehmer KR, Shippee ND, Beebe TJ, et al. Pursuing minimally disruptive medicine:  
21 disruption from illness and health care-related demands is correlated with patient  
22 capacity. *J Clin Epidemiol* 2016;74:227-36. doi: 10.1016/j.jclinepi.2016.01.006  
23 [published Online First: 2016/01/19]
- 24 328. Rosenzweig A, Kuspinar A, Daskalopoulou SS, et al. Toward patient-centered care: a  
25 systematic review of how to ask questions that matter to patients. *Medicine*  
26 *(Baltimore)* 2014;93(22):e120. doi: 10.1097/MD.000000000000120 [published  
27 Online First: 2014/11/15]
- 28 329. Silva AS, Silveira RS, Fernandes GF, et al. [Perceptions and changes in the quality of life  
29 of patients submitted to hemodialysis]. *Rev Bras Enferm* 2011;64(5):839-44.  
30 [published Online First: 2012/03/31]
- 31 330. Gullick J, Monaro S, Stewart G. Compartmentalising time and space: a  
32 phenomenological interpretation of the temporal experience of commencing  
33 haemodialysis. *J Clin Nurs* 2016;1-14. doi: 10.1111/jocn.13697 [published Online  
34 First: 2016/12/22]
- 35 331. Kaba E, Bellou P, Iordanou P, et al. Problems experienced by haemodialysis patients in  
36 Greece. *Br J Nurs* 2007;16(14):868-72. doi: 10.12968/bjon.2007.16.14.24325  
37 [published Online First: 2007/09/14]
- 38  
39  
40  
41  
42  
43

#### 44 TITLES AND LEGENDS OF TABLES AND FIGURES

45  
46 Table 1. PICO criteria for including studies.

47  
48 No legend

49  
50  
51  
52  
53 Table 2. Characteristics of studies included in the review.

54  
55 No legend

1  
2  
3  
4  
5 Table 3. Illustrative quotations.  
6

7 No legend  
8  
9  
10

11  
12 Table 4. Summary of results  
13

14 No legend  
15  
16  
17

18  
19 Figure 1. PRISMA flow chart of screening and selection process  
20

21 No legend  
22  
23  
24

25  
26 Figure 2. Thematic schema of experienced control and cognitive authority in CKD.  
27

28 No legend.  
29  
30  
31  
32  
33  
34  
35  
36  
37  
38  
39  
40  
41  
42  
43  
44  
45  
46  
47  
48  
49  
50  
51  
52  
53  
54  
55  
56  
57  
58  
59  
60

1  
2  
3  
4  
5  
6  
7  
8  
9  
10  
11  
12  
13  
14  
15  
16  
17  
18  
19  
20  
21  
22  
23  
24  
25  
26  
27  
28  
29  
30  
31  
32  
33  
34  
35  
36  
37  
38  
39  
40  
41  
42  
43  
44  
45  
46  
47

Figure 1

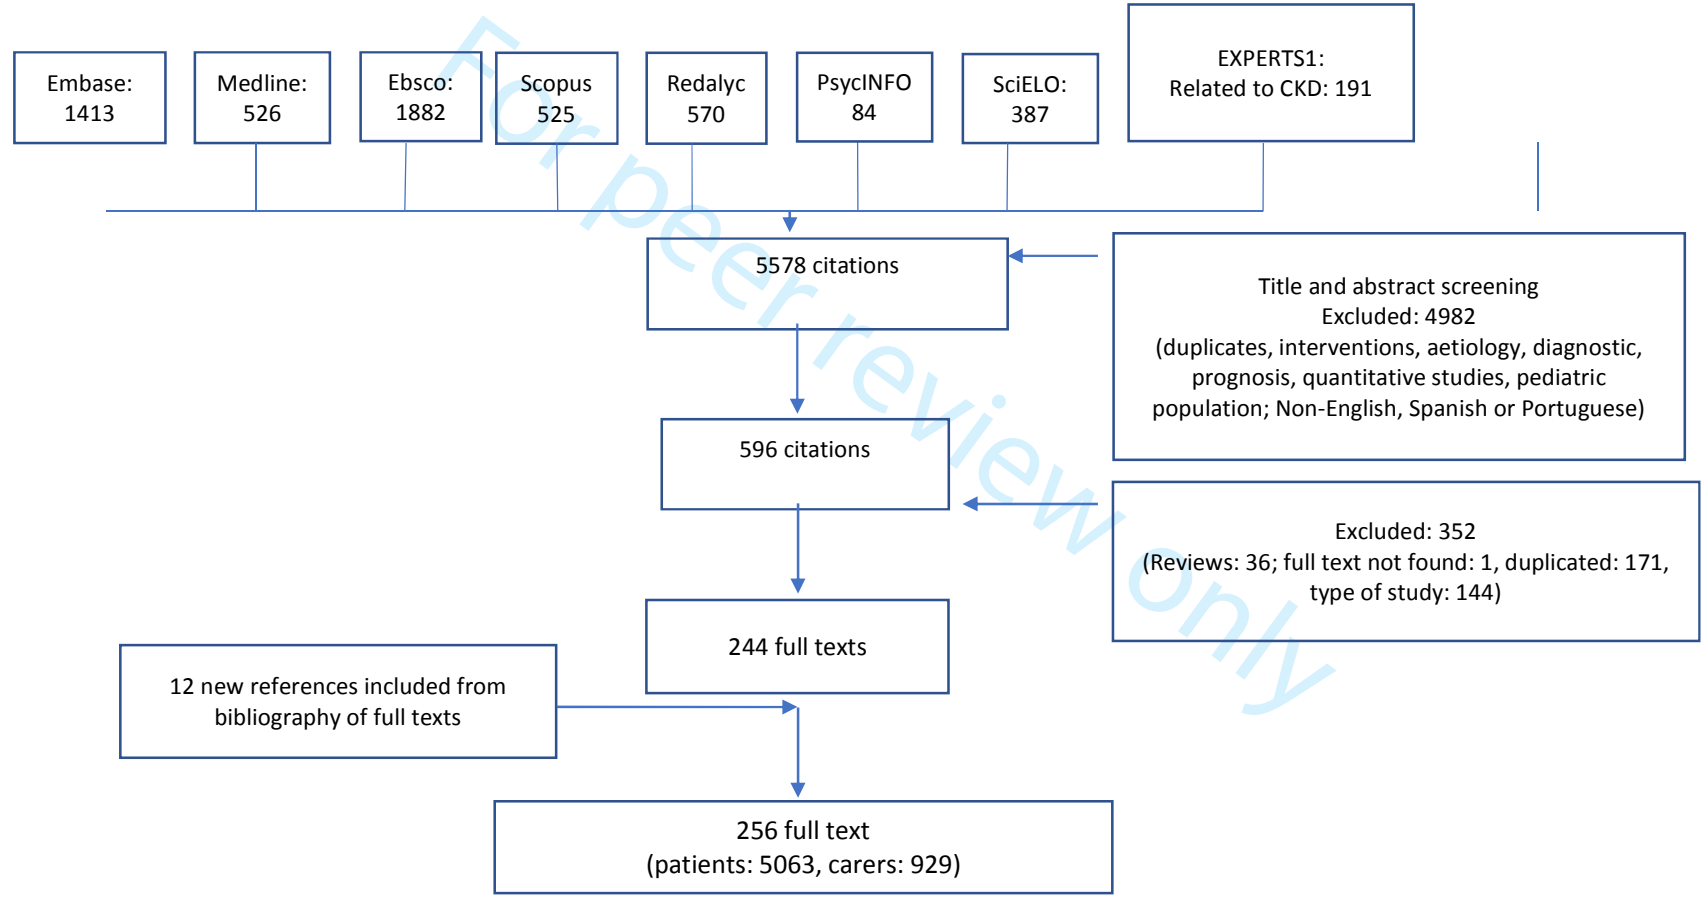

For peer review only

1  
2  
3  
4  
5  
6  
7  
8  
9  
10  
11  
12  
13  
14  
15  
16  
17  
18  
19  
20  
21  
22  
23  
24  
25  
26  
27  
28  
29  
30  
31  
32  
33  
34  
35  
36  
37  
38  
39  
40  
41  
42  
43  
44  
45  
46  
47

1  
2  
3  
4  
5  
6  
7  
8  
9  
10  
11  
12  
13  
14  
15  
16  
17  
18  
19  
20  
21  
22  
23  
24  
25  
26  
27  
28  
29  
30  
31  
32  
33  
34  
35  
36  
37  
38  
39  
40  
41  
42  
43  
44  
45  
46  
47  
48  
49  
50  
51  
52  
53  
54  
55  
56  
57  
58  
59  
60

Figure 2

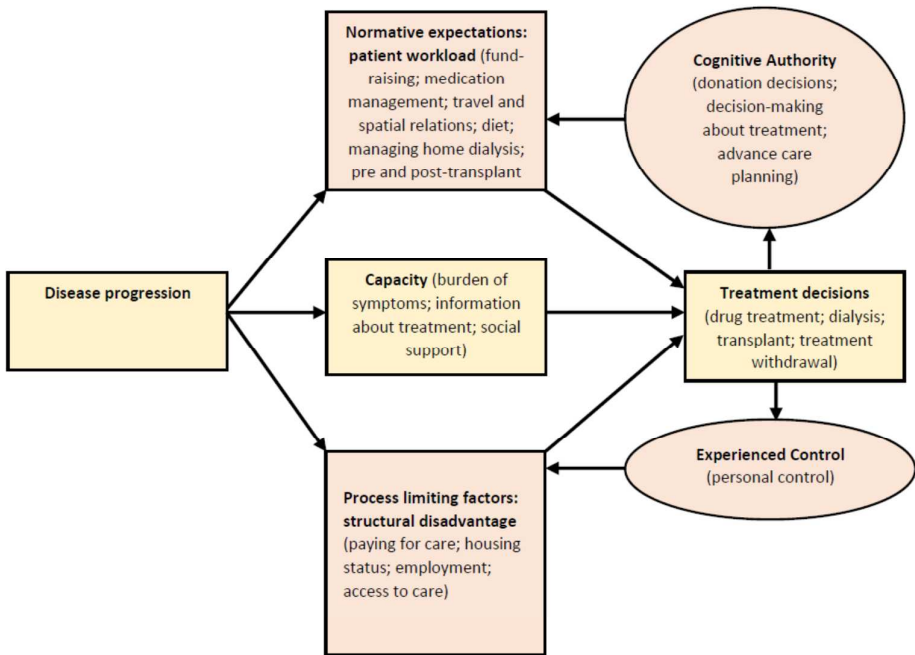

view only

## Appendix 1. Search strategy

- 1 exp Renal Insufficiency, Chronic/
- 2 Renal Insufficiency/
- 3 exp Renal Replacement Therapy/
- 4 Hemodialysis Units, Hospital/
- 5 (chronic kidney or chronic renal or chronic nephropath\*).ti,ab,kf.
- 6 (kidney failure\*1 or renal failure\*1).ti,ab,kf.
- 7 (renal insufficienc\* or kidney insufficienc\*).ti,ab,kf.
- 8 (dialysis or predialysis).ti,ab,kf.
- 9 (hemodialysis or haemodialysis).ti,ab,kf.
- 10 (hemofiltration or haemofiltration).ti,ab,kf.
- 11 (hemodiafiltration or haemodiafiltration).ti,ab,kf.
- 12 (end-stage renal or end-stage kidney or endstage renal or endstage kidney).ti,ab,kf.
- 13 (stage 5 and (renal disease\*1 or kidney disease\*1)).ti,ab,kf.
- 14 (kidney transplant\* or renal transplant\* or kidney graft\* or renal graft\* or kidney replacement\*1 or renal replacement\*1).ti,ab,kf.
- 15 (CKF or CKD or CRF or CRD).ti,ab,kf.
- 16 (ESKD or ESRD or ESKF or ESRF).ti,ab,kf.
- 17 (CAPD or CCPD or APD).ti,ab,kf.
- 18 or/1-17
- 19 exp qualitative research/
- 20 qualitativ\*.ti,ab,kf.
- 21 interviews as topic/
- 22 interview\*.ti,ab,kf.
- 23 focus groups/
- 24 focus group\*1.ti,ab,kf.
- 25 grounded theory/ or (grounded theor\* or grounded study or grounded studies or grounded research or grounded analys\*).ti,ab,kf.
- 26 phenomenol\*.ti,ab,kf.
- 27 (ethnograph\* or ethnonurs\* or ethno-graph\* or ethno-nurs\*).ti,ab,kf.
- 28 (story or stories or storytelling or narrative\*1 or narration\*1).ti,ab,kf.
- 29 (open-ended or open question\* or text\*).ti,ab,kf.
- 30 Narration/ or personal narratives/ or personal narratives as topic/
- 31 (discourse\* analys\* or discours\* analys\*).ti,ab,kf.
- 32 content\* analys\*.ti,ab,kf.
- 33 ethnological.ti,ab,kf.
- 34 purposive sampl\*.ti,ab,kf.
- 35 (constant comparative or constant comparison\*1).ti,ab,kf.
- 36 theoretical sampl\*.ti,ab,kf.
- 37 (theme\* or thematic\*).ti,ab,kf.
- 38 (emic or etic or hermeneutic\* or heuristic\* or semiotic\*).ti,ab,kf.
- 39 data saturat\*.ti,ab,kf.
- 40 participant observ\*.ti,ab,kf.



- 1  
2  
3 41 exp Humanism/ or (humanistic\* or existential\* or experiential\* or paradigm\*).ti,ab,kf.  
4 42 Postmodernism/ or (social construct\* or postmodern\* or post-modern\* or poststructural\* or post-structural\* or  
5 feminis\* or constructivis\*).ti,ab,kf.  
6 43 (action research or cooperative inquir\* or co-operative inquir\*).ti,ab,kf.  
7 44 human science.ti,ab,kf.  
8 45 biographical method\*.ti,ab,kf.  
9 46 life world.ti,ab,kf.  
10 47 theoretical saturation.ti,ab,kf.  
11 48 group discussion\*1.ti,ab,kf.  
12 49 direct observation\*.ti,ab,kf.  
13 50 mixed method\*.ti,ab,kf.  
14 51 (observational method\* or observational approach\*).ti,ab,kf.  
15 52 key informant\*1.ti,ab,kf.  
16 53 (field study or field studies or field research\* or field work\* or fieldwork\*).ti,ab,kf.  
17 54 (semi-structured or semistructured or unstructured or un-structured or informal or in-depth or indepth).ti,ab,kf.  
18 55 "face-to-face".ti,ab,kf.  
19 56 ((guide or structured) adj5 (discussion\*1 or questionnaire\*1)).ti,ab,kf.  
20 57 (heidegger\* or colaizzi\* or speigelberg\* or van manen\* or van kaam\* or merleau ponty\* or husserl\* or giorgi\*  
21 or foucault\* or corbin\* or glaser\*).ti,ab,kf.  
22 58 or/19-57  
23 59 Consumer Behavior/  
24 60 attitude/ or exp attitude to health/ or Attitude to Death/  
25 61 personal satisfaction/  
26 62 exp Emotions/  
27 63 Stress, psychological/  
28 64 exp Patients/px  
29 65 Caregivers/px  
30 66 professional-patient relations/ or nurse-patient relations/ or physician-patient relations/  
31 67 professional-family relations/  
32 68 Empathy/  
33 69 Feedback/  
34 70 ((patient\*1 or client\*1 or user\*1 or consumer\*1 or personal or carer\*1 or caregiver\*1 or care-giver\* or  
35 family\*1 or families) and (experienc\* or perspective\*1 or perception\*1 or opinion\*1 or account or accounts or  
36 attitude\*1 or view or views or viewpoint\*1 or satisf\* or unsatisf\* or dissatisf\* or disatisf\* or belief\*1 or  
37 believ\*)).ti.  
38 71 ((patient\*1 or client\*1 or user\*1 or consumer\*1 or personal or carer\*1 or caregiver\*1 or care-giver\* or  
39 family\*1 or families) adj3 (experienc\* or perspective\*1 or perception\*1 or opinion\*1 or account or accounts or  
40 attitude\*1 or view or views or viewpoint\*1 or satisf\* or unsatisf\* or dissatisf\* or disatisf\* or belief\*1 or  
41 believ\*)).ab,kf.  
42 72 ((patient\*1 or client\*1 or user\*1 or consumer\*1 or personal or carer\*1 or caregiver\*1 or care-giver\* or  
43 family\*1 or families) and (emotion\* or feeling\*1 or happy or happiness or unhappy or unhappiness or sad or  
44 sadness or anger or angry or anxiet\* or anxious\* or worry or worries or worried or worrying or troubled or  
45 troubling or troubles or troublesome or trouble-some or frustrat\* or stress\* or distress\* or embarrass\* or  
46 empath\* or accept\* or alone or lonely or loneliness or fear or fears or fearing or feared or afraid or scary or  
47 scared or bother\* or unbother\* or pleased or displeased\* or concern\* or burden\* or hassl\* or convenien\* or

1  
2  
3 inconvenien\* or confus\* or hope or hopeless or hopeful or trust or trusts or mistrust\* or distrust\* or entrust\* or  
4 trusting or trusted or confiden\* or unconfiden\*).ti.  
5 73 ((patient\* or client\* or user\* or consumer\* or personal or carer\* or caregiver\* or care-giver\* or family\* or  
6 families) adj3 (emotion\* or feeling\* or happy or happiness or unhappy or unhappiness or sad or sadness or  
7 anger or angry or anxiet\* or anxious\* or worry or worries or worried or worrying or troubled or troubling or  
8 troubles or troublesome or trouble-some or frustrate\* or stress\* or distress\* or embarrass\* or empath\* or  
9 accept\* or alone or lonely or loneliness or fear or fears or fearing or feared or afraid or scary or scared or  
10 bother\* or unbother\* or pleased or displeased\* or concern\* or burden\* or hassl\* or convenien\* or inconvenien\*  
11 or confus\* or hope or hopeless or hopeful or trust or trusts or mistrust\* or distrust\* or entrust\* or trusting or  
12 trusted or confiden\* or unconfiden\*).ab,kf.  
13  
14  
15 74 (life experience\* or lived experience\*1 or actual experience\* or real experience\*1).ti,ab,kf.  
16  
17 75 or/59-74  
18  
19 76 18 and 58 and 75  
20  
21 77 (kidney or renal or nephropath\* or dialysis or predialysis or hemodialysis or haemodialysis or hemofiltration or  
22 haemofiltration or hemodiafiltration or haemodiafiltration or CKF or CKD or CRF or CRD or ESKD or ESRD  
23 or ESKF or ESRF or CAPD or CCPD or APD).ti. (419253)  
24  
25 78 qualitativ\*.ti. or qualitative research/  
26  
27 79 ((patient\* or client\* or user\* or consumer\*1 or personal or carer\* or caregiver\* or care-giver\* or family\* or  
28 families) and experiences).ti.  
29  
30 80 ((patient\* or client\* or user\* or consumer\* or personal or carer\* or caregiver\* or care-giver\* or family\* or  
31 families) adj2 experienc\*).ti.  
32  
33 81 77 and (78 or 79 or 80)  
34  
35 82 76 or 81  
36  
37 83 exp animals/ not humans/  
38  
39 84 (news or comment or editorial or letter or case reports or randomized controlled trial).pt.  
40  
41 85 case report.ti.  
42  
43 86 82 not (83 or 84 or 85)  
44  
45 87 limit 86 to (english spanish portuguese language and yr="2000 -Current")  
46  
47  
48  
49  
50  
51  
52  
53  
54  
55  
56  
57  
58  
59  
60

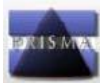

# PRISMA (Preferred Reporting Items for Systematic Reviews and Meta-Analyses) Checklist

[www.prisma-statement.org](http://www.prisma-statement.org)

You must report the page number in your manuscript where you consider each of the items listed in this checklist. If you have not included this information, either revise your manuscript accordingly before submitting or note N/A.

| Section/Topic                      | Item No. | Checklist item                                                                                                                                                                                                                                                                                              | Reported on Page No. |
|------------------------------------|----------|-------------------------------------------------------------------------------------------------------------------------------------------------------------------------------------------------------------------------------------------------------------------------------------------------------------|----------------------|
| <b>TITLE</b>                       |          |                                                                                                                                                                                                                                                                                                             |                      |
| Title                              | 1        | Identify the report as a systematic review, meta-analysis, or both.                                                                                                                                                                                                                                         |                      |
| <b>ABSTRACT</b>                    |          |                                                                                                                                                                                                                                                                                                             |                      |
| Structured summary                 | 2        | Provide a structured summary including, as applicable: background; objectives; data sources; study eligibility criteria, participants, and interventions; study appraisal and synthesis methods; results; limitations; conclusions and implications of key findings; systematic review registration number. |                      |
| <b>INTRODUCTION</b>                |          |                                                                                                                                                                                                                                                                                                             |                      |
| Rationale                          | 3        | Describe the rationale for the review in the context of what is already known.                                                                                                                                                                                                                              |                      |
| Objectives                         | 4        | Provide an explicit statement of questions being addressed with reference to participants, interventions, comparisons, outcomes, and study design (PICOS).                                                                                                                                                  |                      |
| <b>METHODS</b>                     |          |                                                                                                                                                                                                                                                                                                             |                      |
| Protocol and registration          | 5        | Indicate if a review protocol exists, if and where it can be accessed (e.g., Web address), and, if available, provide registration information including registration number.                                                                                                                               |                      |
| Eligibility criteria               | 6        | Specify study characteristics (e.g., PICOS, length of follow-up) and report characteristics (e.g., years considered, language, publication status) used as criteria for eligibility, giving rationale.                                                                                                      |                      |
| Information sources                | 7        | Describe all information sources (e.g., databases with dates of coverage, contact with study authors to identify additional studies) in the search and date last searched.                                                                                                                                  |                      |
| Search                             | 8        | Present full electronic search strategy for at least one database, including any limits used, such that it could be repeated.                                                                                                                                                                               |                      |
| Study selection                    | 9        | State the process for selecting studies (i.e., screening, eligibility, included in systematic review, and, if applicable, included in the meta-analysis).                                                                                                                                                   |                      |
| Data collection process            | 10       | Describe method of data extraction from reports (e.g., piloted forms, independently, in duplicate) and any processes for obtaining and confirming data from investigators.                                                                                                                                  |                      |
| Data items                         | 11       | List and define all variables for which data were sought (e.g., PICOS, funding sources) and any assumptions and simplifications made.                                                                                                                                                                       |                      |
| Risk of bias in individual studies | 12       | Describe methods used for assessing risk of bias of individual studies (including specification of whether this was done at the study or outcome level), and how this information is to be used in any data synthesis.                                                                                      |                      |

| Section/Topic                 | Item No. | Checklist item                                                                                                                                                                                           | Reported on Page No. |
|-------------------------------|----------|----------------------------------------------------------------------------------------------------------------------------------------------------------------------------------------------------------|----------------------|
| Summary measures              | 13       | State the principal summary measures (e.g., risk ratio, difference in means).                                                                                                                            |                      |
| Synthesis of results          | 14       | Describe the methods of handling data and combining results of studies, if done, including measures of consistency (e.g., $I^2$ ) for each meta-analysis.                                                |                      |
| Risk of bias across studies   | 15       | Specify any assessment of risk of bias that may affect the cumulative evidence (e.g., publication bias, selective reporting within studies).                                                             |                      |
| Additional analyses           | 16       | Describe methods of additional analyses (e.g., sensitivity or subgroup analyses, meta-regression), if done, indicating which were pre-specified.                                                         |                      |
| <b>RESULTS</b>                |          |                                                                                                                                                                                                          |                      |
| Study selection               | 17       | Give numbers of studies screened, assessed for eligibility, and included in the review, with reasons for exclusions at each stage, ideally with a flow diagram.                                          |                      |
| Study characteristics         | 18       | For each study, present characteristics for which data were extracted (e.g., study size, PICOS, follow-up period) and provide the citations.                                                             |                      |
| Risk of bias within studies   | 19       | Present data on risk of bias of each study and, if available, any outcome level assessment (see item 12).                                                                                                |                      |
| Results of individual studies | 20       | For all outcomes considered (benefits or harms), present, for each study: (a) simple summary data for each intervention group (b) effect estimates and confidence intervals, ideally with a forest plot. |                      |
| Synthesis of results          | 21       | Present results of each meta-analysis done, including confidence intervals and measures of consistency.                                                                                                  |                      |
| Risk of bias across studies   | 22       | Present results of any assessment of risk of bias across studies (see Item 15).                                                                                                                          |                      |
| Additional analysis           | 23       | Give results of additional analyses, if done (e.g., sensitivity or subgroup analyses, meta-regression [see Item 16]).                                                                                    |                      |
| <b>DISCUSSION</b>             |          |                                                                                                                                                                                                          |                      |
| Summary of evidence           | 24       | Summarize the main findings including the strength of evidence for each main outcome; consider their relevance to key groups (e.g., healthcare providers, users, and policy makers).                     |                      |
| Limitations                   | 25       | Discuss limitations at study and outcome level (e.g., risk of bias), and at review-level (e.g., incomplete retrieval of identified research, reporting bias).                                            |                      |
| Conclusions                   | 26       | Provide a general interpretation of the results in the context of other evidence, and implications for future research.                                                                                  |                      |
| <b>FUNDING</b>                |          |                                                                                                                                                                                                          |                      |

1  
2  
3  
4  
5  
6  
7  
8  
9  
10  
11  
12  
13  
14  
15  
16  
17  
18  
19  
20  
21  
22  
23  
24  
25  
26  
27  
28  
29  
30  
31  
32  
33  
34  
35  
36  
37  
38  
39  
40  
41  
42  
43  
44  
45  
46  
47

| Section/Topic | Item No. | Checklist item                                                                                                                             | Reported on Page No. |
|---------------|----------|--------------------------------------------------------------------------------------------------------------------------------------------|----------------------|
| Funding       | 27       | Describe sources of funding for the systematic review and other support (e.g., supply of data); role of funders for the systematic review. |                      |

*From:* Moher D, Liberati A, Tetzlaff J, Altman DG, The PRISMA Group (2009). Preferred Reporting Items for Systematic Reviews and Meta-Analyses: The PRISMA Statement. PLoS Med 6(6): e1000097. doi:10.1371/journal.pmed1000097

**Once you have completed this checklist, please save a copy and upload it as part of your submission. Please DO NOT include this checklist as part of the main manuscript document. It must be uploaded as a separate file.**

For peer review only

# BMJ Open

## The Work of Being an Adult Patient with Chronic Kidney Disease: A Systematic Review of Qualitative Studies

|                                 |                                                                                                                                                                                                                                                                                                                                                                                                                                                                                                                                                                                                                            |
|---------------------------------|----------------------------------------------------------------------------------------------------------------------------------------------------------------------------------------------------------------------------------------------------------------------------------------------------------------------------------------------------------------------------------------------------------------------------------------------------------------------------------------------------------------------------------------------------------------------------------------------------------------------------|
| Journal:                        | <i>BMJ Open</i>                                                                                                                                                                                                                                                                                                                                                                                                                                                                                                                                                                                                            |
| Manuscript ID                   | bmjopen-2018-023507.R1                                                                                                                                                                                                                                                                                                                                                                                                                                                                                                                                                                                                     |
| Article Type:                   | Research                                                                                                                                                                                                                                                                                                                                                                                                                                                                                                                                                                                                                   |
| Date Submitted by the Author:   | 28-Jun-2018                                                                                                                                                                                                                                                                                                                                                                                                                                                                                                                                                                                                                |
| Complete List of Authors:       | Roberti, Javier; FINAER<br>Cummings, Amanda; University of Southampton, Faculty of Health Sciences<br>Myall, Michelle; University of Southampton, Faculty of Health Sciences<br>Harvey, Jonathan; University of Southampton, Faculty of Health Sciences<br>Lippiett, Kate; University of Southampton, Faculty of Health Sciences<br>Hunt, Katherine; University of Southampton, Faculty of Health Sciences<br>Cicora, Federico; FINAER<br>Alonso, Juan; Universidad de Buenos Aires, Faculty of Social Sciences<br>May, Carl; London School of Hygiene and Tropical Medicine Faculty of Epidemiology and Population Health |
| <b>Primary Subject Heading</b>: | Qualitative research                                                                                                                                                                                                                                                                                                                                                                                                                                                                                                                                                                                                       |
| Secondary Subject Heading:      | Renal medicine, Sociology                                                                                                                                                                                                                                                                                                                                                                                                                                                                                                                                                                                                  |
| Keywords:                       | Treatment burden, Chronic kidney disease, Systematic review, Haemodialysis, Kidney transplant                                                                                                                                                                                                                                                                                                                                                                                                                                                                                                                              |
|                                 |                                                                                                                                                                                                                                                                                                                                                                                                                                                                                                                                                                                                                            |

SCHOLARONE™  
Manuscripts

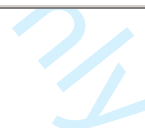

1  
2  
3 **1 The Work of Being an Adult Patient with Chronic Kidney Disease: A Systematic**  
4  
5 **2 Review of Qualitative Studies**  
6  
7  
8  
9

10 **4 Authors**

11  
12 Javier Roberti<sup>1</sup> javierroberti@gmail.com  
13

14 Amanda Cummings<sup>2,3</sup> a.cummings@soton.ac.uk  
15

16 Michelle Myall<sup>2,3</sup> m.myall@soton.ac.uk  
17

18 Jonathan Harvey<sup>2</sup> jonathan.harvey@open.ac.uk  
19

20 Kate Lippiett<sup>2</sup> kalcle15@soton.ac.uk  
21

22 Katherine Hunt<sup>2</sup> k.j.hunt@soton.ac.uk  
23

24 Federico Cicora<sup>1</sup> fcicora5@gmail.com  
25

26 Juan Pedro Alonso<sup>4</sup> juanpedroalonso79@gmail.com  
27

28 Carl R. May<sup>5</sup> Carl.May@lshtm.ac.uk  
29  
30  
31  
32  
33

34 **16 Author affiliations**

35  
36 1. FINAER, Foundation for Research and Assistance of Kidney Disease, Buenos Aires,  
37  
38 Argentina.  
39

40 2. Faculty of Health Sciences, University of Southampton, Southampton, UK  
41

42 3. NIHR CLAHRC Wessex, University of Southampton, Southampton, UK  
43

44 4. Faculty of Social Sciences, Universidad de Buenos Aires, Argentina  
45

46 5. Faculty of Public Health and Policy, London School of Hygiene and Tropical  
47  
48 Medicine, UK  
49

50  
51  
52 **24 Corresponding author**  
53

54 Javier Roberti, FINAER, Palestina 525, 1182 Buenos Aires, Argentina  
55  
56  
57  
58  
59  
60

1 email: javierroberti@gmail.com. Phone: +5491135633749.

2 **ABSTRACT**

3 **Introduction:** Chronic kidney disease (CKD) requires patients and caregivers to invest  
4 in self-care and self-management of their disease. We aimed to describe the *work*  
5 for adult patients that follows from these investments and develop an understanding  
6 of burden of treatment (BoT).

7 **Methods:** Systematic review of qualitative primary studies, that builds on EXPERTS 1  
8 Protocol, PROSPERO: CRD42014014547. We included research published in English,  
9 Spanish and Portuguese, from 2000 to present, describing experience of illness and  
10 healthcare of people with CKD and caregivers. Searches were conducted in MEDLINE,  
11 Embase, CINAHL Plus, PsycINFO, Scopus, SciELO, and Redalyc. Content was analysed  
12 with theoretical framework using middle-range theories.

13 **Results:** Searches resulted in 260 studies from 30 countries (5115 patients and 1071  
14 carers). Socio-economic status was central to the experience of CKD especially in its  
15 advanced stages when renal replacement treatment is necessary. Unfunded  
16 healthcare was fragmented and of indeterminate duration, with patients often  
17 depending on emergency care. Treatment could lead to unemployment, and in turn,  
18 to un- or under-insurance. Patients feared catastrophic events because of diminished  
19 financial capacity and made strenuous efforts to prevent them. Transportation to  
20 and from haemodialysis centre, with variable availability and cost, was a common  
21 problem, aggravated for patients in non-urban areas, or with young children, and  
22 low resources. Additional work for those un- or under-insured included fund-raising.  
23 Transplanted patients needed to manage finances and responsibilities in an



1  
2  
3 uncertain context. Information on the disease, treatment options, and  
4  
5 immunosuppressants side-effects was a widespread problem.

6  
7 **Conclusions:** Being a person with end-stage kidney disease always implied high  
8  
9 burden, time-consuming, invasive and exhausting tasks, impacting on all aspects of  
10  
11 patients and caregivers' lives. Further research on BoT could inform healthcare  
12  
13 professionals and policy makers about factors that shape patients' trajectories and  
14  
15 contribute towards a better illness experience for those living with CKD.  
16  
17  
18  
19  
20

### 21 **Article summary**

- 22  
23 • We analysed data with a coding framework supported by middle-range  
24  
25 theories to understand the work involved in being a person with CKD.
- 26  
27 • Comprehensive inclusion of publications in English, Spanish, and Portuguese,  
28  
29 which may enhance the transferability of our findings.
- 30  
31 • The variety of methodologies, quality of reporting, and heterogeneity of  
32  
33 perspectives make synthesis difficult.  
34  
35  
36  
37  
38  
39

40 **Key words:** chronic kidney disease, burden of treatment, treatment burden,  
41  
42 haemodialysis, transplantation, chronic illness  
43  
44  
45  
46

### 47 **INTRODUCTION**

48  
49  
50 Chronic Kidney Disease (CKD) contributes significantly to global morbidity and  
51  
52 mortality.<sup>1-4</sup> Even in its early stages, the risk of death, cardiovascular events,  
53  
54  
55  
56  
57  
58  
59  
60

1  
2  
3 1 cerebrovascular disorders, hospitalization, reduced health-related quality of life,  
4  
5 2 anxiety, depression and suicidal ideation is increased.<sup>1-6</sup>  
6  
7  
8  
9 3

10  
11 4 Worldwide, about 500 million people are affected by CKD; about 80% of these live in  
12  
13 5 low and middle-income countries (LMIC); an estimated 3 million people with end-  
14  
15 6 stage kidney disease (ESKD) receive renal replacement therapy (RRT) with either  
16  
17 7 dialysis or transplantation.<sup>1 7 8</sup> The number of people receiving RRT is increasing and  
18  
19 8 will more than double by 2030, but a significant number of people without access to  
20  
21 9 this type of live-saving treatment will remain.<sup>9</sup> In 2010, at least 2.28 million people  
22  
23 10 might have died because of lack of access to RRT, mostly in LMIC in Asia, Africa, and  
24  
25 11 Latin America.<sup>9</sup>  
26  
27  
28  
29  
30

31 13 Much is now known about the pathophysiological and treatment trajectories of CKD,  
32  
33 14 and about the associated burden of symptoms experienced by patients. More  
34  
35 15 recently, there has been increasing interest in the way that complex long-term  
36  
37 16 conditions require patients and their carers to invest in self-care and self-  
38  
39 17 management of their disease.<sup>10-15</sup> The work for patients and carers that follows from  
40  
41 18 these investments, including medication management, medical visits, laboratory  
42  
43 19 tests, lifestyle changes, and monitoring in addition to the activities done as part of  
44  
45 20 life, is here termed burden of treatment (BoT), which adds to the burden of  
46  
47 21 symptoms (BoS).<sup>10 13 16</sup> Research on BoT has focused on long-term conditions such as  
48  
49 22 diabetes, chronic obstructive pulmonary disease and chronic heart failure with the  
50  
51 23 development of analytic framework and patient created taxonomies.<sup>10 16-27</sup> Patients  
52  
53 24 and carers are expected to actively participate in managing both index conditions  
54  
55  
56  
57  
58  
59  
60

1 and comorbidities and, depending on their resources or lack thereof, they often  
2 need to negotiate or renegotiate the responsibilities that healthcare providers and  
3 healthcare systems assign to them.<sup>13 28 29</sup> Patient and carers' experience in managing  
4 the disease and its treatment, including their choices and expectations, is affected by  
5 structural, relational and resilience factors; the interactions among these factors  
6 remain understudied.<sup>30</sup> The aim of this study is to develop specific understanding of  
7 treatment burden experienced by people with CKD and ESKD extending it to  
8 experiences of uninsured and under-insured patients in LMIC.

## 10 **METHODS**

11 This is a systematic review of primary qualitative studies, which builds on the  
12 published EXPERTS1 Protocol and its meta-review of qualitative reviews.<sup>30 31</sup>  
13 PROSPERO registration number is CRD42014014547. This review follows the  
14 Enhancing Transparency in Reporting the Synthesis of Qualitative Research (ENTREQ)  
15 framework.<sup>32</sup> We interrogated a subset of qualitative primary research papers  
16 concerned with CKD identified by EXPERTS1 qualitative meta-review to understand  
17 the dynamics of patient experience of complexity and treatment burden in long-term  
18 life-limiting conditions. EXPERTS1 search was updated and expanded to Spanish and  
19 Portuguese language literature.

### 21 **Eligibility, inclusion and exclusion criteria**

22 Eligibility criteria for study inclusion were developed using the PICO (participants,  
23 interventions, comparators, and outcomes) framework (Table 1). Inclusion criteria  
24 were primary qualitative and mixed-method studies of adult patients diagnosed with

1  
2  
3 1 CKD in any stage and their formal or informal carers; in any type of treatment or  
4  
5 2 healthcare provision; not limited to comparative studies; with qualitative data on the  
6  
7 3 patients and carers' experiences on any aspect of CKD, in any stage, and its  
8  
9 4 treatments; in English, Spanish and Portuguese. Following the EXPERTS1 protocol,  
10  
11 5 studies were excluded if they were of other EXPERTS1 index conditions; if they  
12  
13 6 reported results of treatments, interventions, tests or surveys; were guidelines,  
14  
15 7 discussions of the literature or editorials, notes, news, letters, and case reports; if  
16  
17 8 the experiences described by patients and carers could not be clearly  
18  
19 9 discriminated.<sup>31</sup> Studies describing experiences of children with CKD were excluded  
20  
21 10 because their BoT may be significantly different from that of adult patients. The year  
22  
23 11 of publication 2000 onward was established to include current treatments.  
24  
25  
26  
27  
28  
29  
30

### 31 **Study selection**

32  
33 14 A first search for the EXPERTS1 meta-review was conducted in MEDLINE, Embase,  
34  
35 15 CINAHL Plus, PsycINFO, and Scopus. For this review, searches were updated using  
36  
37 16 the same databases and expanded to include studies published in Spanish and  
38  
39 17 Portuguese with additional searches in the Iberoamerican databases SciELO  
40  
41 18 (Scientific Electronic Library Online), and Redalyc (Red de Revistas Científicas de  
42  
43 19 América Latina y el Caribe, España y Portugal). Searches were completed by April  
44  
45 20 2017 and identified papers published between 1 January 2000 and March 2017.  
46  
47 21 Search strategy is included in Appendix 1. For a first set of studies, titles and  
48  
49 22 abstracts were independently screened by AC, MM and CRM, disagreements  
50  
51 23 resolved by JH. Full text papers (n=1238) were obtained and screened by JH, KAL and  
52  
53 24 MM; disagreements resolved by KH or AC. Of 606 articles, 191 were related to CKD.  
54  
55  
56  
57  
58  
59  
60

1  
2  
3 1 For a second set, updated results in English and studies in Spanish and Portuguese  
4  
5 2 were screened by JR, JPA, disagreements resolved by FC. Two authors (JR, JPA)  
6  
7 3 assessed papers against the Critical Appraisal Skills Program (CASP) qualitative  
8  
9 4 research checklist.<sup>33</sup> As there is no accepted criteria for the exclusion of qualitative  
10  
11 5 studies based appraisal score, we did not exclude studies based on quality. See  
12  
13  
14 6 Figure 1 for screening and selection process.

### 7 **Data extraction and analysis**

8 Data outlining study characteristics were extracted into table 2. Manuscripts were  
9  
10 entered into Atlas.Ti v7.5.12 (Scientific Software Development GmbH). The results  
11  
12 sections and participant quotations of the primary studies were analysed line-by-line  
13  
14 using directed content analysis, sometimes called framework analysis.<sup>34</sup> The coding  
15  
16 frame drew on concepts from the Burden of Treatment Theory and the Cognitive  
17  
18 Authority Theory.<sup>18-21 29 35 36</sup> Coding was conducted by JR and CRM, with a third party  
19  
20 involved for disagreements (JPA), and reviewed and discussed by two researchers  
21  
22 (AC, MM). Refinement of the coding frame and analysis was iterative, codes were  
23  
24 identified or merged reading the result sections of primary studies and consulting  
25  
26 the theoretical framework. Investigator triangulation (comparison of results of two  
27  
28 or more researchers) was used to capture relevant issues, reflect participants'  
29  
30 experience as reported, and ensure the credibility of the findings.  
31  
32  
33  
34  
35  
36  
37  
38  
39  
40  
41  
42  
43  
44  
45  
46  
47

### 48 **Patient and Public Involvement**

49  
50  
51 23 Patients and/or public were not involved in the development of the research  
52  
53 24 question. To ensure wide dissemination of this systematic review, it is published in  
54  
55 25 peer reviewed open-access journal and presented in research meetings.  
56  
57  
58  
59  
60

## RESULTS

Combined searches yielded 5407 citations and resulted in 260 studies from 30 countries included in the final analysis. A total of 5115 patients and 1071 carers were included. Countries most frequently represented in the studies were: United States with 52 (20%), United Kingdom with 46 (18%), Brazil with 28 (11%), Australia with 25 (10%), Canada with 20 (8%), Sweden with 19 (7%), New Zealand with 8 (3%), and Iran with 7 (3%) studies. Most studies (n=193, 74%) described the experiences of patients with ESKD, in dialysis or conservative treatment, 28 (11%) studies reported on transplanted patients, 17 (6%) studies referred to patients with CKD stages 1-4, and the remainder studies described experiences of patients with CKD in all stages. Table 2 shows characteristics of studies included in the review, table 3 shows illustrative quotations, table 4 shows summary of results, and table 5 shows main challenges related to BoT.

### Structural inequalities

*Access to care.* Poverty and other socio-economic disadvantages such as unemployment or poor housing conditions were defining factors for lack of treatment or interrupted care.<sup>37-52</sup> Living as a person with CKD and ESKD always implied some degree of financial burden, from having to pay for the whole dialysis treatment or transplantation surgery to out-of-pocket payments of incidentals, even in countries with universal coverage.<sup>35 47-49 51 53-63</sup> Poorly funded or unfunded

1  
2  
3 healthcare resulted in fragmented treatment across healthcare systems.<sup>47 48 64</sup>  
4  
5 Although patients who had difficulties affording treatment were naturally more  
6  
7 concerned with accessing healthcare than in improving services, they recognized  
8  
9 fragmentation and lack of integration as important problems.<sup>40 45 48-51</sup> Where  
10  
11 government or private insurance coverage of ESKD treatment was limited, e.g.  
12  
13 Mexico or India, patients paid for some or all the following: vascular access,  
14  
15 hospitalization, medical visits, haemodialysis sessions, medication, tests, prescribed  
16  
17 food, transport and meals.<sup>45 47-50 60 65</sup> In such settings, patients received dialysis  
18  
19 treatment only if they could afford it or when they had access to free sessions.<sup>45 47-50</sup>  
20  
21 <sup>60 65</sup> Medication was sometimes counterfeit, obtained on the black market, as  
22  
23 legitimate medication was beyond patients' reach.<sup>49</sup> For the uninsured, dependence  
24  
25 on emergency care added uncertainty and risk, whatever their treatment modality,  
26  
27 as in the case of many undocumented and uninsured immigrants in the United  
28  
29 States.<sup>35 47-49 52 66</sup> In countries with poor healthcare infrastructure, patients reported  
30  
31 shortage of public specialized hospitals, long delays to undergo examinations, limited  
32  
33 number of haemodialysis machines available, lack of ward space, or poor bed  
34  
35 conditions in hospitals, e.g. poor hygiene, worn-out mattresses, shortage of linen; to  
36  
37 avoid delays, patients sometimes had tests performed by private providers.<sup>40 50 60 67</sup>  
38  
39 <sup>68</sup>  
40  
41  
42  
43  
44  
45  
46 When home dialysis was available, patients had to pay for transport to training,  
47  
48 appointments, and other check-ups; moreover, some equipment, supplies, increased  
49  
50 utility bills, and home modifications represented unexpected expenses.<sup>51 53 61 69-73</sup> In  
51  
52 countries with coverage of RRT, for patients whose first language was different from  
53  
54 that where treatment was received, as in the case of migrants, communication was a  
55  
56  
57  
58  
59  
60

1  
2  
3 barrier for discussions with healthcare professionals; family members and  
4  
5 neighbours acted as translators at appointments.<sup>53 74-76</sup> Where language was shared,  
6  
7 communications between clinicians and patients of different ethnic origins—for  
8  
9 example, Australian Aborigines and New Zealand Maoris—was often itself a source  
10  
11 of conflict and disadvantage, because of prejudice.<sup>53 57-59 77-82</sup>  
12  
13  
14  
15

16  
17 In some countries, the transplantation procedure could be particularly expensive,  
18  
19 even at public hospitals.<sup>35 47-49 66 83</sup> Moreover, patients sometimes found that the  
20  
21 expensive immunosuppressants necessary after the transplant were not covered by  
22  
23 their insurance; other patients who obtained information about the high costs of  
24  
25 immunosuppressants and realising that they could not afford them, were forced to  
26  
27 continue with dialysis until it failed.<sup>49 83-85</sup> In Mexico, structural constraints resulted  
28  
29 in transplanted patients being sent back to small peripheral clinics with no  
30  
31 transplantation expertise, increasing the risk of iatrogenic or poorly managed  
32  
33 complications.<sup>83</sup>  
34  
35  
36  
37  
38

39  
40 *Housing conditions.* Unsuitable housing was a barrier to home dialysis if it could not  
41  
42 accommodate equipment, and was impossible without an adequate electricity  
43  
44 supply.<sup>51 61</sup> In rented accommodation, landlords might not approve of necessary  
45  
46 modifications. Home dialysis was not a treatment option for those with no fixed  
47  
48 abode.<sup>51 61 70 86</sup>  
49  
50  
51  
52

53  
54 *Employment status.* Patients who were physically able to continue working often had  
55  
56 informal or temporary jobs, with diminished income; others were forced into  
57  
58  
59  
60



1  
2  
3 unemployment, leading to new financial problems.<sup>39 45 52 60 69 72 87-91</sup> Unemployed  
4  
5 patients in the United States were covered by government or state schemes;  
6  
7 however, this coverage either diminished or ceased if they found work with a new  
8  
9 insurance.<sup>35 52</sup>  
10  
11  
12  
13

#### 14 **Patient workload**

15  
16 *Self-care.* People with CKD and ESKD had complex medication regimens managed  
17  
18 through dispensing aids, daily activities associated to medication taking such as  
19  
20 meals, family support, or a combination of these.<sup>40 46 71 86 92-106</sup> Anticipating dialysis,  
21  
22 patients underwent vascular access, a way to reach the blood for haemodialysis,  
23  
24 undergoing minor surgery and care needed to be taken to prevent infections or  
25  
26 clotting.<sup>66 107-110</sup> To care for their vascular access, patients kept the access area clean,  
27  
28 changed bandages, restricted themselves from lifting heavy objects and were alert  
29  
30 for pain or hardness in the area.<sup>108 111</sup>  
31  
32  
33 Patients controlled their diets and fluid intake between dialysis sessions, and  
34  
35 managed food cravings and thirst with strategies such as thinking of the potential  
36  
37 detrimental consequences of drinking water, avoiding thoughts and behaviours that  
38  
39 could trigger thirst, and modifying social activities to minimise exposure to hot  
40  
41 weather, social pressure and temptation to intake certain foods or fluids.<sup>46 63 112-120</sup>  
42  
43  
44 Women also faced potential family conflicts if they followed prescribed diets.<sup>45 62 121-</sup>  
45  
46  
47 <sup>124</sup> In certain cultures, including immigrants who preserved their customs in other  
48  
49 countries, the perceived association of a rich diet and wealth acted as a barrier to  
50  
51 adherence to a restrictive diet, essential to self-care, as patients feared being  
52  
53 stigmatized as poor.<sup>62 121 125</sup>  
54  
55  
56  
57  
58  
59  
60

1  
2  
3  
4  
5  
6  
7  
8  
9  
10  
11  
12  
13  
14  
15  
16  
17  
18  
19  
20  
21  
22  
23  
24  
25  
26  
27  
28  
29  
30  
31  
32  
33  
34  
35  
36  
37  
38  
39  
40  
41  
42  
43  
44  
45  
46  
47  
48  
49  
50  
51  
52  
53  
54  
55  
56  
57  
58  
59  
60

1  
2 *Travel and time management.* People with ESKD travelled to haemodialysis centres  
3  
4 three times a week, received treatment for several hours, and then transported  
5  
6 themselves home again; very often, transportation represented a problem for  
7  
8 patients because of pick-up delays, long distances, or high costs.<sup>15 47-49 53 76 86 126-133</sup>

6 Patients receiving dialysis arranged their daily activities between treatment sessions,  
7  
8 adjusted the timing and intensity of their activities to their fatigue, and tried to  
9  
10 schedule medical appointments all on one day to avoid further interactions with the  
11  
12 healthcare system.<sup>55 134-145</sup> The treatment was seen by most patients as an emotional  
13  
14 and time imposition that caused boredom and frustration.<sup>63 146-152</sup> Time was often  
15  
16 spent waiting for visits, prescriptions, and tests.<sup>55 134-145 153</sup> Parents also arranged  
17  
18 child care while they were in sessions, or had to travel for treatment.<sup>49 53 55 154 155</sup>

14 *Home dialysis.* For patients receiving home dialysis, training was required which  
15  
16 necessitated extended periods of leave from work.<sup>61 70 156-158</sup> They and their families  
17  
18 had to adapt their home to accommodate equipment and materials, and spent more  
19  
20 time cleaning in case health workers assessed their housing conditions.<sup>152 158-162</sup>  
21  
22 Tasks associated included managing treatment at set times each day, recording  
23  
24 blood pressure and body weight, titrating medications, and adopting aseptic  
25  
26 techniques, as well as adhering to diet and fluid restrictions.<sup>156 157 163</sup> In the case of  
27  
28 developing peritonitis, workload increased as antibiotics had to be reconstituted and  
29  
30 injected.<sup>156 157</sup>

1  
2  
3 1 *Pre-transplantation adaptation.* People with ESKD adjusted to being on the  
4  
5 2 transplant waiting list and prepared for the possibility of receiving a kidney from a  
6  
7 3 deceased donor at any time.<sup>43 115 133 164-170</sup> The tasks included hospital visits, several  
8  
9 4 investigations and tests, saving money for the operation, and maintaining robust  
10  
11 5 health; many potential recipients felt overwhelmed by all that was necessary.<sup>132 133</sup>  
12  
13 6 <sup>164 165 170-173</sup> Talking to others about their requirement for a kidney transplant  
14  
15 7 involved making the request itself to potential living donors, educating people about  
16  
17 8 CKD, treatment options and donation.<sup>39 47 164 174</sup>  
18  
19  
20  
21  
22

23 10 *Post-transplantation adjustment.* After transplantation, patients' workload included  
24  
25 11 financial and occupational changes resulting from a new type of treatment and  
26  
27 12 status, managing complex medication regimens and managing social relations.<sup>84 85</sup>  
28  
29 13 <sup>175-180</sup> These tasks had to be balanced against the work of safeguarding access to  
30  
31 14 healthcare, organising their disability insurance, interacting with healthcare  
32  
33 15 providers, managing symptoms, monitoring medication side effects, and managing  
34  
35 16 self-care in relation to diet, fluid and physical activity.<sup>84 85 175-180</sup> Although  
36  
37 17 transplantation was seen as a route back to normality, it was laden with ambiguous  
38  
39 18 feelings towards the donor, unanticipated challenges in forming or maintaining  
40  
41 19 relationships, financial worries, the responsibility of supporting their family,  
42  
43 20 disappointments when side effects were noticed, and a prevailing prognostic  
44  
45 21 uncertainty.<sup>83 85 175-177 181-186</sup>  
46  
47  
48  
49  
50  
51  
52

53 23 *Navigating health care structures.* Very often, patients had to identify and call on the  
54  
55 24 appropriate institutions to obtain a diagnosis, laboratory exams, treatment, or  
56  
57

1  
2  
3 coverage; contacting several public and private healthcare providers, social  
4  
5 insurance offices, charity organisations and NGOs.<sup>48 49 125 161</sup> In settings with coverage  
6  
7 of RRT, socio-economically disadvantaged patients could also find it difficult to  
8  
9 access financial support and navigate the social support system, which resulted in  
10  
11 not receiving the assistance to which they were entitled.<sup>51</sup> Lack of continuity of care  
12  
13 contributed to patients using services without sufficient expertise in CKD or ESKD,  
14  
15 such as emergency departments or peripheral health centres.<sup>49 101</sup> The efficiency  
16  
17 focus of the medical system was perceived by patients and professionals as a barrier  
18  
19 to a personal connection; moreover, patients also recognised professionals'  
20  
21 dismissive attitudes toward patients' experiential knowledge.<sup>173 102</sup>  
22  
23  
24  
25  
26  
27

28 *Negotiating costs and fund-raising.* Those patients and carers in countries with  
29  
30 limited health coverage needed to perform additional work; poor families sold  
31  
32 goods, products or services, organized raffles to collect money, or obtained loans.<sup>47-</sup>  
33  
34  
35 <sup>49 125</sup> They also contacted treatment centres, other patients, hospitals, and non-  
36  
37 government organizations to ask for free dialysis sessions or medication. For this  
38  
39 reason, disadvantaged people were advised by healthcare staff on how to seek help  
40  
41 in charities and advocacy organizations.<sup>47</sup> In more affluent settings, patients also  
42  
43 struggled to negotiate coverage of extra expenses, such as those related to home  
44  
45 dialysis or conservative management.<sup>51 161</sup>  
46  
47  
48  
49  
50

## 51 **Capacity**

52  
53 *Physical and mental capacity.* The ability of people with ESKD to carry out daily  
54  
55 activities, including their paid job, was limited by symptoms associated with the  
56  
57  
58  
59  
60

1  
2  
3 disease and dialysis treatment, such as pain, fatigue, anxiety, depression, and sexual  
4  
5 problems,<sup>37 44 55 63 90 96 138 140 154 187-201</sup> sometimes overlooked by health  
6  
7 professionals.<sup>58 94 101 202-204</sup> When in poor physical health, patients relied on wider  
8  
9 family networks and neighbours to help with activities related to BoT such as  
10  
11 scheduling and attending medical appointments, arranging transportation to those  
12  
13 appointments, ordering and arranging medical supplies, and training; also, other  
14  
15 daily tasks such as food preparation, or shopping.<sup>37 118 161 205-209</sup> Carers were involved  
16  
17 in the dialysis procedure, accompanying patients to dialysis and responding to  
18  
19 psychosocial needs.<sup>45 69 97 129 141 143 161 210-216</sup> Patients' capacity to carry out the  
20  
21 activities related to healthcare were affected by insufficient financial resources and  
22  
23 the fear of catastrophic consequences, such as death because of lack of dialysis  
24  
25 treatment or immunosuppressive medication in the case of transplanted patients.<sup>47</sup>  
26  
27  
28  
29  
30  
31  
32  
33  
34  
35  
36  
37  
38  
39  
40  
41  
42  
43  
44  
45  
46  
47  
48  
49  
50  
51  
52  
53  
54  
55  
56  
57  
58  
59  
60

15 *Managing information.* Obtaining information on the disease and treatment was a  
16  
17 significant burden for patients and carers. Patients reported that their information  
18  
19 on the disease and treatment options was often insufficient or difficult to  
20  
21 comprehend, particularly during the early stages of their trajectory, independent of  
22  
23 income or coverage level.<sup>38 50 57 58 61 63 64 77 92 109 121 125 127-131 188 205 219-230</sup> Patients may  
24  
25 not have asked for clarification for fear of not understanding or because they did not  
26  
27 even know what to ask; the desire for more patient-centred care were widely  
28  
29 expressed. Short clinic visits, unknown technical jargon, and high levels of anxiety  
30  
31 were barriers to accessing information.<sup>61 102 223 231-234</sup> Other patients could sometimes  
32  
33 supply information about dialysis options, travelling, hygiene regimens, dietary

1  
2  
3 restrictions, benefit advice, timing of treatment, and pain management.<sup>117 174 235-238</sup>  
4  
5 For organ donation and transplantation, people usually received information  
6  
7 through discussions with other patients, providers, social workers, financial  
8  
9 representatives, the internet, and, in affluent populations, informative meetings.<sup>117</sup>  
10  
11  
12 <sup>174 235-238</sup> In relation to transplantation, patients reported they needed practical  
13  
14 information about the unexpected side effects of immunosuppressive medication;  
15  
16 most frequently mentioned were higher risk of cancer, infections, weight gain, and  
17  
18 fragile skin.<sup>178 184 185 239-242</sup> Other information needs for transplanted patients  
19  
20 included coping with emotions related to the transplant, what to do when a suitable  
21  
22 organ became available, alternatives to transplantation, and how the waiting list  
23  
24 worked.<sup>240 242-245</sup> Family members were afraid to bother the healthcare team<sup>246</sup>, and  
25  
26 perceiving little power in comparison to health professionals, downplayed their  
27  
28 knowledge in front of them.<sup>210</sup> Patients and carers were responsible of obtaining and  
29  
30 carrying their medical files and test-results to appointments when the health-care  
31  
32 administrative systems were not integrated.<sup>49 125</sup> Some had anticipated that  
33  
34 transplantation would offer dramatic health improvement but were disappointed  
35  
36 when they experienced side effects, particularly cancer.<sup>44 63 101 106 122 167 190 193 199 206 214</sup>  
37  
38  
39  
40  
41  
42 <sup>247-251</sup>  
43  
44  
45  
46  
47 *Social support.* Most people highlighted the support from family, neighbours, friends,  
48  
49 staff, other patients and church communities; friends, staff and spiritual groups were  
50  
51 particularly important for those living alone.<sup>39 44 60 62 215 247 249 252-258</sup> A lack of social  
52  
53 support was also frequently reported.<sup>44 60 247 259</sup> In a UK study, patients socio-  
54  
55 economic disadvantage adversely affected the availability of social support, and it  
56  
57  
58  
59  
60

1 was suggested that personal relationships sometimes broke down when potential  
2 donors declined to donate.<sup>39</sup> Attending dialysis was sometimes seen as a social  
3 outlet, where they could make friends with staff and patients. Younger participants  
4 often considered the schedule flexibility of home dialysis as an opportunity for  
5 maintaining their employment and contact with their family and established social  
6 networks.<sup>61 152</sup> To demonstrate resilience, some patients tried to maintain a sense of  
7 normalcy, integrating the dialysis community into their social network.<sup>42 139 210 260</sup>

### 9 **Experienced control**

10 *Personal control.* Feelings of personal control were achieved through learning how to  
11 manage CKD and ESKD, finding a balance between illness and normalcy, or even  
12 denying the seriousness of their condition.<sup>218 260 261</sup> The experience of feelings of  
13 personal control led to increased self-confidence and well-being.<sup>15 189 251</sup> Strategies  
14 for maintaining control included requesting tests, withholding information from  
15 clinicians, monitoring and modifying their treatments, and checking the activities of  
16 dialysis nurses assisting them.<sup>139 246 251 262-265</sup> People with ESKD experimented with  
17 their therapy to determine if the prescriptions were really necessary, they also  
18 shortened dialysis hours to reduce worsening symptoms, to meet work  
19 commitments, or to participate in an unexpected social situation.<sup>54 55</sup> Lengthening  
20 treatment hours could facilitate higher than usual fluid removal or managing  
21 symptoms.<sup>54 55</sup> Some patients entrusted decisions entirely to the care team, and this  
22 promoted feelings of security.<sup>61 70 102 107 266 267</sup> The main barrier to personal control  
23 was lack of information about treatments, test results, and the course of their illness  
24 and that they could not choose when and where to travel.<sup>15 43 61 63 197 239 268</sup> However,

1 even when patients knew they were not in control, they felt unsafe if the treatment  
2 went differently from what was expected.<sup>269</sup> Patients recognised prognostic  
3 uncertainty, and their own fear of incompetence as an obstacle to choosing the  
4 appropriate dialysis modality.<sup>54 72 92 132 133 150 161 223 251 268 270-274</sup> For many patients,  
5 home dialysis restored a sense of control and freedom to manage their schedule,  
6 especially if it was nocturnal.<sup>51 70 158 220 263 275</sup> Dependence on emergency care or on  
7 fund-raising tasks to cover life-saving treatment represented a severe case of lack of  
8 experienced control.<sup>35 47-49 52 66</sup>

9  
10 *Control and Decision-making.* Control translated into participation in decision-  
11 making; which was affected by the healthcare staff's attitude toward the patients'  
12 adherence to treatment.<sup>236</sup> Lack of choice in decision-making about dialysis modality  
13 was very common; when possible, modality was negotiated and agreed after  
14 discussions with clinicians and family members, reading educational material, or  
15 attending informational meetings.<sup>202 248 270 273 274 276-278</sup> Home dialysis patients  
16 appreciated training to build confidence and skills to utilise the machine.<sup>54 70 111 270 279</sup>  
17 <sup>280</sup> Patients in dialysis aspired to improve their situation by receiving a transplant,  
18 motivating them to adhere to treatment; other motivations included family,  
19 especially their children, work and beliefs.<sup>55 58 281</sup> People with ESKD whose clinicians  
20 failed to discuss care, eligibility and ineligibility for transplant, and potential donors  
21 with them felt disempowered.<sup>39 55 57 58 77 78 169 282</sup> When relatives offered to donate a  
22 kidney, many patients felt reluctant to accept this because of their concerns about  
23 the future health of the donor; other patients had reservations about accepting  
24 kidneys from deceased donors because of the donor's age and medical history.<sup>172 181</sup>



1  
2  
3 235 Once transplanted, the main clinical objective was preserving the graft. However,  
4  
5 2 the disease and its treatment continued to be a significant burden on patients' social  
6  
7 3 capital and financial capacity, with unexpected side effects.<sup>49 63 89 96 167 283-285</sup>  
8  
9

10 4  
11  
12 5 *Carers' involvement.* Relatives wanted to be involved in discussions on dialysis  
13  
14 6 modality as dialysis would take up a large part of their lives.<sup>55 70 111 156-158 223 279 286</sup>  
15  
16 7 Carers of patients on home dialysis needed to know more about the dialysis  
17  
18 8 techniques to feel confident about self-managing the treatment, they stressed the  
19  
20 9 importance of 24-hour telephone access for advice.<sup>61 69</sup> Family members were afraid  
21  
22 10 to bother the healthcare team<sup>246</sup>, and perceiving little power in comparison to health  
23  
24 11 professionals, used strategies to downplay their knowledge of the disease or the  
25  
26 12 treatment in front of them.<sup>210 287</sup> To cope with caring, carers sought support in  
27  
28 13 psychiatric help or religion when available, or support in religion.<sup>141 247</sup> Patients who  
29  
30 14 decided to stop dialysis did not usually ask for their carers' opinion; when physicians  
31  
32 15 thought the patient was too ill to decide, carers were consulted and felt death could  
33  
34 16 be liberating if the patient was in pain and with no response to treatment.<sup>134 141 161</sup>  
35  
36  
37  
38  
39  
40  
41

42 18 *End-of-life decisions.* Some patients felt that advance care planning (ACP) was hard  
43  
44 19 and unnecessary as they trusted their families to make decisions; others were less  
45  
46 20 concerned, trusted their healthcare team and felt empowered.<sup>236 288 289</sup> Family  
47  
48 21 members felt ACP was necessary as a means to protect patients.<sup>290-292</sup> At the end-of-  
49  
50 22 life, maintaining control was a struggle with respect to autonomy and dignity.<sup>134 136</sup>  
51  
52

53 23 <sup>205 251</sup> Patients based their dialysis withdrawal or non-acceptance decision on having  
54  
55 24 lived a full life, on nature taking its course, on their fear of being a burden for their  
56  
57  
58  
59  
60

1 families, their bodies being invaded and dialysis accelerating death.<sup>128 293</sup> For some,  
2 the decision to withdraw from dialysis meant asserting their self-determination.<sup>251</sup>  
3 <sup>294</sup> Carers' acceptance of patients' decision was influenced by the perception of  
4 conservative management as a non-invasive treatment, the advanced age of the  
5 patient, and the lack of benefit received from haemodialysis.<sup>64 128 134 161</sup> Although  
6 family members were often uncomfortable about making end-of-life decisions, they  
7 tended to recognise it was important to respect the patient's wishes.<sup>202 233 292</sup> Figure  
8 2 shows thematic schema of experienced control and cognitive authority in CKD.

## 10 DISCUSSION

11 Our findings demonstrate that the work and capacity of patients and carers are  
12 highly unstable situational factors that make up the BoT. Capacity is particularly  
13 diminished by socioeconomic factors, which ultimately exacerbates the work of  
14 patients and their carers; this may occur even in regions with universal health  
15 coverage. Particularly in LMICs, patients with ESKD are often under-insured or not at  
16 all, which makes it almost impossible for them to attain life-saving treatments.  
17 Patients with ESKD can be caught in a vicious cycle whereby they lose their job and  
18 health insurance because of ill health or because they need time off from work to  
19 attend dialysis, leading to exacerbations in disease, lack of financial access to  
20 treatment, and difficulty obtaining a job because of poor health. Patients often fear  
21 catastrophic consequences due to a lack of financial capacity, and make strenuous  
22 efforts to prevent them. Thematic syntheses with robust methods have covered  
23 different aspects of being a patient with CKD.<sup>295-308</sup> Here, we focused on three  
24 elements of BoT, namely workload, capacity and experienced control, to develop an

1  
2  
3 understanding of the BoT of CKD, focusing on ESKD and including the experiences of  
4  
5 patients in contexts of structural inequalities.  
6

7  
8  
9 Worldwide, many individuals with CKD and especially with ESKD receive no  
10  
11 treatment or receive only fragmented care.<sup>8 35 309-314</sup> Millions of preventable deaths  
12  
13 occur because of lack of access to RRT.<sup>9</sup> Moreover, in some LMICs with universal  
14  
15 health coverage, resources may be limited because of geography or poor  
16  
17 infrastructure; in such cases, the use of free health providers can create delays that  
18  
19 compromise the treatment itself, resulting in patients struggling to pay for private  
20  
21 providers. When this occurs, healthcare becomes fragmented and uncoordinated.  
22  
23 Even in some modern welfare states, health inequalities persist, particularly affecting  
24  
25 minorities, those who are unemployed, or undocumented.<sup>315</sup> One example is the use  
26  
27 of emergency haemodialysis by undocumented and uninsured immigrants with  
28  
29 ESKD.<sup>52</sup> Several studies have highlighted the imperative necessity to address this  
30  
31 disturbing reality.<sup>316-323</sup>  
32  
33  
34  
35  
36  
37  
38

39 When health systems fail to meet patients' treatment needs, patients mobilise  
40  
41 resources and develop coping strategies such as accepting charity or selling assets.<sup>13</sup>  
42  
43 <sup>29 312</sup> This distressing scenario adds to their workload and very easily overwhelms  
44  
45 patients' capacity. Transportation to and from dialysis centres is a frequent  
46  
47 challenge, it is time-consuming, costly, or simply not available. Those patients living  
48  
49 in non-urban areas in countries where home dialysis is not available have to travel  
50  
51 long distances or relocate to access treatment; some may be faced with the decision  
52  
53 of leaving their young children in the care of others for long periods of time. In many  
54  
55  
56  
57  
58  
59  
60

1  
2  
3 1 LMICs, the costs of RRT remain prohibited for both individuals and health-care  
4  
5 2 systems; dialysis and transplantation costs often lead to financial ruin of the family,  
6  
7 3 discontinuation, and death.<sup>324</sup> In fact, patients, families, and health-care  
8  
9 4 professionals are burdened with having to choose between life and death.<sup>324</sup> On the  
10  
11 5 other hand, in countries with robust health coverage, patients may feel  
12  
13 6 overwhelmed even by having to travel short distances to the treatment centre every  
14  
15 7 two days, especially if they do not have support or, if offered home dialysis, they  
16  
17 8 may experience social isolation, unexpected costs, and lack of sufficient technical  
18  
19 9 assistance. In settings in which renal replacement therapy (RRT) costs are covered,  
20  
21 10 patients may have the choice of not initiating or withdrawing from dialysis.<sup>324</sup> Among  
22  
23 11 other factors, advanced age, white ethnicity, and chronic disease are associated with  
24  
25 12 dialysis withdrawal.<sup>325</sup>  
26  
27 13  
28  
29 14 Support from social networks, professionals, and other patients is critical in  
30  
31 15 improving patient's capacity. Spirituality and church communities are significant  
32  
33 16 resources for coping with illness and its treatment, as seen in several studies.<sup>21 201 249</sup>  
34  
35 17 <sup>257 326-329</sup> However, social support is not guaranteed; in some cultures, patients  
36  
37 18 perceive lack of support by their own networks caused by discrimination because of  
38  
39 19 their illness, leading to intolerable levels of BoT.<sup>44 60 247 259</sup> It has also been shown  
40  
41 20 that informal care offered by family, friends or neighbours can burden patients  
42  
43 21 through uncomfortable feelings of dependency or the obligation to have an  
44  
45 22 optimistic attitude toward their condition.<sup>330</sup> Our findings support this view; patients  
46  
47 23 often fear becoming a burden on their families, which affects their decisions related  
48  
49 24 to treatment options.  
50  
51  
52  
53  
54  
55  
56  
57  
58  
59  
60

1  
2  
3  
4  
5  
6  
7  
8  
9  
10  
11  
12  
13  
14  
15  
16  
17  
18  
19  
20  
21  
22  
23  
24  
25  
26  
27  
28  
29  
30  
31  
32  
33  
34  
35  
36  
37  
38  
39  
40  
41  
42  
43  
44  
45  
46  
47  
48  
49  
50  
51  
52  
53  
54  
55  
56  
57  
58  
59  
60

1  
2 We confirmed that patients' capacity can be undermined by insufficient or  
3 inadequate information. Deficits in communication between patients and  
4 professionals are endemic and rooted in structural and system factors.<sup>20 30 296 308 331</sup>

5 This shortfall affects decisions regarding dialysis modality, medication management,  
6 and the possibility of utilising a living donation. Patient discussions with professionals  
7 must result in a collaborative partnership and should not simply provide  
8 information.<sup>330</sup> For example, patients' concerns and expectations about waitlists,  
9 eligibility, and allocation for transplantation could be addressed via additional  
10 information, clinical conversations, and access to specialised psychological  
11 therapists.<sup>306</sup>

12  
13 Immigrant populations do not always have access to healthcare; when they do,  
14 language, cultural, and religious differences can act as barriers to care and contribute  
15 to the BoT. In developed countries, the need to provide RRT for migrants and  
16 refugees with ESKD will increase as more people are displaced to countries where  
17 RRT is available; this situation poses ethical challenges at the societal and individual  
18 levels.<sup>321</sup> It is necessary to promote and support equitable access to care for those  
19 living within any border by means of organisational position statements and focused  
20 research.<sup>322</sup> For migrants with access to care, culturally competent navigator  
21 programmes could contribute to the improvement of healthcare disparities.<sup>332</sup>

22  
23 Surprisingly, patients who undergo haemodialysis tend to perceive that staff  
24 underestimate their capacities.<sup>58 94 101 202-204</sup> When healthcare professionals do not

1  
2  
3 take into consideration patients' knowledge or values, a diminished participation in  
4  
5 self-care and relationally induced non-adherence can occur. Treatment plans should  
6  
7 be discussed against an assessment of patient and caregiver capacity, as well as their  
8  
9 material, social, and cognitive resources.<sup>28 333</sup>  
10

11  
12  
13  
14 Changes in treatment may be needed as CKD progresses to its later stages—  
15  
16 symptom control may become the main treatment focus.<sup>10 11</sup> Our results relate  
17  
18 predominantly to the BoT of patients with ESKD, as most reports included in this  
19  
20 systematic review have addressed the experiences of this group of patients. Indeed,  
21  
22 a large proportion of patients with early-stage CKD are unaware of their diagnosis.<sup>334</sup>  
23  
24

25  
26 In patients whose kidney function will not decline to a point necessitating RRT, the  
27  
28 overall BoT may be related to a reduction of risk.<sup>10 11</sup> In the later stages of CKD,  
29  
30 symptom control may become the main treatment focus, and the time-consuming  
31  
32 and invasive treatment of dialysis, by any modality, and all tasks related to dialysis  
33  
34 represent considerable portions of the burden.<sup>10 11</sup> Moreover, the BoT is influenced  
35  
36 by patients' financial resources, family support, and comorbidities, as well as the  
37  
38 healthcare setting. In fact, because of the likely coexistence of multiple conditions,  
39  
40 elderly patients experience a greater BoT than do younger patients.<sup>24</sup> Management  
41  
42 should be co-ordinated among professionals, particularly for patients with ESKD and  
43  
44 multiple morbidities,<sup>23</sup> who frequently experience fragmented care with a  
45  
46 substantial time and travel burden, as well as contradictory healthcare advice.<sup>23</sup>  
47  
48  
49

50  
51 Challenged by constraints, a patient's sense of control can become fragile. As seen in  
52  
53 our review, patients often employ a range of strategies to retain their control, such  
54  
55 as withholding clinical information from professionals, asking for additional tests, or  
56  
57

1  
2  
3 1 modifying their treatment. Although a patient's capacity to cope with BoT is often  
4  
5 2 exceeded, healthcare systems increasingly delegate responsibilities to patients and  
6  
7 3 carers, focusing on self-management and compliance.<sup>30 335</sup> When overwhelmed,  
8  
9  
10 4 patients may be forced to renegotiate their responsibilities with actors in the health  
11  
12 5 system and their own social networks.<sup>29</sup>  
13  
14  
15  
16  
17

18  
19 7 Our review has important limitations. The variety of methodologies, quality of  
20  
21 8 reporting, and heterogeneity of perspectives make synthesis difficult. Only studies  
22  
23 9 that included face-to-face interviews were included to capture rich qualitative data,  
24  
25 10 and studies that reported methods such as telephone and postal questionnaires or  
26  
27 11 surveys were excluded. Studies with paediatric patients and/or their carers were  
28  
29 12 excluded, as BoT may significantly differ. Although the use of framework analysis can  
30  
31 13 improve the transparency of coding and identify underlying assumptions, it can also  
32  
33 14 be interpreted as a limitation because findings may be influenced by and connected  
34  
35 15 to these theories. For a more global perspective, studies published in other  
36  
37 16 languages could have been included. Grey literature was excluded to manage the  
38  
39 17 scope of the review. We analysed data with a coding framework supported by  
40  
41 18 middle-range theories to understand the work involved in being a person with CKD  
42  
43 19 and how practises are organised and integrated into social contexts. The major  
44  
45 20 strengths of this study are the comprehensive inclusion of publications in the English,  
46  
47 21 Spanish, and Portuguese languages to understand the experience of patients in  
48  
49 22 LMICs, which may enhance the transferability of our findings, the broad description  
50  
51 23 of BoT across all stages of CKD, and the use of theories to underpin our findings.  
52  
53  
54  
55  
56  
57  
58  
59  
60

1  
2  
3 However, the included studies representing only some LMICs can hardly be  
4  
5 presumed to reflect patients' experiences in these countries.  
6  
7  
8  
9

#### 10 **CONCLUSION**

11 To the best of our knowledge, this is the first theory-led review that focuses on the  
12 structural inequalities that shape patient and caregivers' experiences related to BoT  
13  
14 in CKD. The inclusion of LMICs extends our understanding of the experiences of  
15  
16 individuals living in these countries and the work they undertake to manage their  
17  
18 conditions. CKD can result in invasive and exhausting BoT, which is exacerbated in  
19  
20 contexts of limited health coverage, socioeconomic disadvantages, and marked  
21  
22 imbalances in power. An urgent, collaborative, multipronged approach is needed to  
23  
24 address the overwhelming BoT of CKD that, in many populations, results in  
25  
26 premature death.<sup>8 312</sup> However, knowledge gaps persist in resource-limited settings  
27  
28 and the nephrology community need to quantify the burden of CKD, understand its  
29  
30 social impact, raise awareness of the disease among healthcare workers, and  
31  
32 advocate for cost-effective and setting-specific detection and prevention strategies.<sup>9</sup>  
33  
34  
35  
36  
37  
38  
39  
40  
41  
42  
43  
44  
45  
46  
47  
48  
49  
50  
51  
52  
53  
54  
55  
56  
57  
58  
59  
60

17 <sup>324 336 337</sup> The design of innovative policies, interventions, and activities are  
18 warranted to support and empower patients, considering the constraints and  
19 structure of systems that patients navigate in their disease trajectory. This will lead  
20 to a better understand of their burden, with the objective of improving quality of  
21 care and the illness experience.



## ABBREVIATIONS

BoT, burden of treatment; CKD, chronic kidney disease; ESKD, end-stage kidney disease; LMIC, low- and middle-income countries.

## DECLARATIONS

### Ethics approval and consent to participate

Not applicable

### Consent to publish

Not applicable

### Availability of data and material

EXPERTS1 Protocol is published in BMJ Open, with open access

May CR, Masters J, Welch L, Hunt K, Pope C, Myall M, Griffiths P, Roderick P, Glanville J,

Richardson A: **EXPERTS 1—experiences of long-term life-limiting conditions among patients**

**and carers: protocol for a qualitative meta-synthesis and conceptual modelling study.** *BMJ*

*Open* 2015, **5**(4):e007372.

Meta-review of systematic reviews is published in BMJ Open, with open access

May CR, Cummings A, Myall M, Harvey J, Pope C, Griffiths P, Roderick P, Arber M, Boehmer

K, Mair FS *et al*: **Experiences of long-term life-limiting conditions among patients and**

**carers: what can we learn from a meta-review of systematic reviews of qualitative studies**

**of chronic heart failure, chronic obstructive pulmonary disease and chronic kidney**

**disease?** *BMJ Open* 2016, **6**(10):e011694.

Search strategy is included as supplementary file.

1  
2  
3  
4  
5  
6  
7  
8  
9  
10  
11  
12  
13  
14  
15  
16  
17  
18  
19  
20  
21  
22  
23  
24  
25  
26  
27  
28  
29  
30  
31  
32  
33  
34  
35  
36  
37  
38  
39  
40  
41  
42  
43  
44  
45  
46  
47  
48  
49  
50  
51  
52  
53  
54  
55  
56  
57  
58  
59  
60

## Competing interests

The authors declare that they have no competing interests.

## Funding

The first stages of this project (EXPERTS1 Protocol, search strategy and meta review) were partially funded by the National Institute for Health Research Collaboration for Leadership in Applied Health Research and Care (NIHR CLAHRC) Wessex which is a partnership between Wessex NHS organizations and partners and the University of Southampton. The views expressed are those of the author(s) and not necessarily those of the NHS, the NIHR or the Department of Health. Funders had no role in study design, data collection and analysis, decision to publish, or preparation of the manuscript.

## Authors' contributions

JR drafted the paper. AC, MM, CRM, JH screened titles and abstracts in first search round. Full papers were screened by JH, KL, MM, KH and AC. JR performed database searches for update and extension of search. JR, JPA and FC screened updated results. JR, CRM and JPA performed content analysis. CRM, MM, AC, JPA critically reviewed the manuscript for important intellectual content; all authors approved the final version of the paper.

## Acknowledgment:

Original search strategy developed with the systematic reviews group of the York

1  
2  
3 1 Health Economics Consortium (YHEC).  
4  
5  
6  
7  
8  
9  
10  
11  
12  
13

14  
15  
16  
17  
18  
19  
20  
21  
22  
23  
24  
25  
26  
27  
28  
29  
30  
31  
32  
33  
34  
35  
36  
37  
38  
39  
40  
41  
42  
43  
44  
45  
46  
47  
48  
49  
50  
51  
52  
53  
54  
55  
56  
57  
58  
59  
60

3

4 **Table 1. PICO criteria for including studies**

---

|                      |                                                                                           |
|----------------------|-------------------------------------------------------------------------------------------|
| <b>Population:</b>   | Patients of at least 18 years of age, diagnosed with CKD, and formal and informal carers  |
| <b>Intervention:</b> | Experiences of healthcare provision, any type of treatment for CKD.                       |
| <b>Comparator:</b>   | Not limited to comparator studies;                                                        |
| <b>Outcomes:</b>     | Qualitative data on patients and carers' experiences of care for those patients with CKD. |
| <b>Study type:</b>   | Primary studies, qualitative or mixed methods studies.                                    |
| <b>Time:</b>         | From 2000 to present.                                                                     |

---

5

**Table 2:** Characteristics of included studies

| Author                       | Year | Country        | Setting          | Patients | Carers | Type of patient | Data collection                       | Data analysis reported          |
|------------------------------|------|----------------|------------------|----------|--------|-----------------|---------------------------------------|---------------------------------|
| Aasen <sup>107</sup>         | 2012 | Norway         | 5 H, East, West. | 11       |        | ESKD            | Interviews                            | Critical discourse              |
| Aasen <sup>246</sup>         | 2012 | Norway         | 5 H, East, West  |          | 7      | ESKD            | Interviews                            | Critical discourse              |
| Aasen <sup>287</sup>         | 2012 | Norway         | 5 H, East, West  | 11       | 17     | ESKD            | Interviews                            | Critical discourse              |
| Al-Arabi <sup>104</sup>      | 2006 | United States  | 1 C, Southwest   | 80       |        | ESKD            | Interviews                            | Naturalistic inquiry, thematic  |
| Allen <sup>173</sup>         | 2011 | Canada         | 1 H, urban       | 7        |        | ESKD            | Ethnographic observations, interviews | Participatory action, thematic  |
| Allen <sup>64</sup>          | 2015 | Canada         | 2 H              | 6        | 11     | ESKD            | Ethnographic observations, interviews | Thematic                        |
| Anderson <sup>77</sup>       | 2008 | Australia      | 9 H, 17 C        | 241      |        | ESKD            | Interviews                            | Thematic                        |
| Anderson <sup>53</sup>       | 2012 | Australia      | 9 H, 17 C        | 241      |        | ESKD            | Interviews                            | Thematic                        |
| Arslan <sup>200</sup>        | 2009 | Turkey         | 1 H, Konya       | 10       |        | ESKD            | Interviews                            | Content                         |
| Ashby <sup>38</sup>          | 2005 | Australia      | 2 H, Melbourne   | 16       |        | ESKD            | Interviews                            | Grounded theory                 |
| Avril-Sephula <sup>118</sup> | 2014 | United Kingdom | 1 H, North       | 8        |        | ESKD            | Interviews                            | Thematic                        |
| Axelsson <sup>187</sup>      | 2012 | Sweden         | 2 H, 2 C         | 8        |        | ESKD            | Interviews                            | Phenomenological, hermeneutical |
| Axelsson <sup>136</sup>      | 2012 | Sweden         | 2 H, 2 C         | 8        |        | ESKD            | Interviews                            | Phenomenological, hermeneutical |
| Axelsson <sup>134</sup>      | 2015 | Sweden         | 2 H, 1 C, urban  |          | 14     | ESKD            | Interviews                            | Content                         |
| Bailey <sup>235</sup>        | 2015 | United Kingdom | Bristol          | 32       |        | Transplanted    | Interviews                            | Constant comparison             |
| Bailey <sup>39</sup>         | 2016 | United Kingdom | Bristol          | 13       |        | Transplanted    | Interviews                            | Constant comparison             |
| Baillie <sup>156</sup>       | 2015 | United Kingdom | Wales            | 16       | 9      | ESKD            | Interviews                            | Thematic                        |
| Baillie <sup>157</sup>       | 2015 | United Kingdom | Wales            | 16       | 9      | ESKD            | Interviews                            | Thematic                        |

| Author                       | Year | Country        | Setting             | Patients | Carers | Type of patient | Data collection                     | Data analysis reported          |
|------------------------------|------|----------------|---------------------|----------|--------|-----------------|-------------------------------------|---------------------------------|
| Barbosa <sup>145</sup>       | 2009 | Brazil         | 1 C, Rio de Janeiro | 10       |        | ESKD            | Interviews                          | Grounded theory                 |
| Bath <sup>252</sup>          | 2003 | United Kingdom | South               | 10       |        | ESKD            | Interviews                          | Phenomenological                |
| Beanlands <sup>210</sup>     | 2005 | Canada         | Ontario             |          | 37     | ESKD            | Interviews                          | Grounded theory                 |
| Bennett <sup>197</sup>       | 2013 | Australia      | 4 C                 | 9        | 2      | ESKD            | Interviews facilitated by images    | Thematic                        |
| Blogg <sup>69</sup>          | 2008 | Australia      | urban               |          | 5      | ESKD            | Interviews                          | Ethnographic                    |
| Boaz <sup>175</sup>          | 2014 | United Kingdom | rural, urban        | 25       |        | Transplanted    | Interviews                          | Constant comparison             |
| Bourbonnais <sup>105</sup>   | 2012 | Canada         | 1 H                 | 25       |        | ESKD            | Interviews                          | Content                         |
| Bridger <sup>238</sup>       | 2009 | United Kingdom | GP, South           | 23       |        | CKD             | Interviews, drawings, journals      | Grounded theory                 |
| Bristowe <sup>126</sup>      | 2015 | United Kingdom | 2 C, London         | 20       |        | ESKD            | Interviews                          | Thematic                        |
| Brito-Ashurst <sup>121</sup> | 2011 | United Kingdom | London              | 20       |        | CKD             | Focus groups, vignettes and diaries | Thematic                        |
| Browne <sup>226</sup>        | 2016 | United States  | South               | 40       |        | ESKD            | Focus groups                        | Content                         |
| Buldukoglu <sup>186</sup>    | 2005 | Turkey         | Antalya             | 40       |        | Transplanted    | Open ended questions                | Constant comparison             |
| Burnette <sup>78</sup>       | 2009 | Australia      | 1 C, Perth          | 6        |        | ESKD            | Interviews                          | Thematic                        |
| Cadena <sup>154</sup>        | 2015 | Mexico         | Coyotepec, Mexico   | 5        |        | ESKD            | Interviews                          | Interpretative phenomenological |
| Calvey <sup>146</sup>        | 2011 | Ireland        | NA                  | 7        |        | ESKD            | Interviews                          | Colaizzi's method               |
| Calvin <sup>251</sup>        | 2004 | United States  | 3 C, Texas          | 12       |        | ESKD            | Interviews                          | Constant comparison             |
| Calvin <sup>292</sup>        | 2014 | United States  | Texas               |          | 18     | ESKD            | Interviews                          | Interpretative, Glaserian       |
| Campos <sup>234</sup>        | 2003 | Brazil         | 1 H, Sao Paulo      | 7        |        | ESKD            | Interviews                          | Thematic                        |
| Campos <sup>87</sup>         | 2010 | Brazil         | 1 H, Sao Paulo      | 7        |        | ESKD            | Interviews                          | Thematic                        |
| Campos <sup>88</sup>         | 2015 | Brazil         | H, C, Paraná        | 23       |        | ESKD            | interviews                          | Content                         |

| Author                       | Year | Country         | Setting                | Patients | Carers | Type of patient | Data collection | Data analysis reported         |
|------------------------------|------|-----------------|------------------------|----------|--------|-----------------|-----------------|--------------------------------|
| Cases <sup>279</sup>         | 2011 | United Kingdom  | NA                     | 6        |        | ESKD            | Interviews      | Phenomenological               |
| Cervantes <sup>52</sup>      | 2017 | United States   | 1 H, Colorado          | 20       |        | ESKD            | Interviews      | Thematic                       |
| Chatrung <sup>188</sup>      | 2015 | United States   | California             | 8        |        | CKD             | Interviews      | Thematic                       |
| Chenitz <sup>86</sup>        | 2014 | United States   | 4 C, Pennsylvania      | 30       |        | ESKD            | Interviews      | Grounded theory                |
| Chiaranai <sup>40</sup>      | 2016 | Thailand        | 1 H                    | 26       |        | ESKD            | Interviews      | Thematic                       |
| Cho <sup>41</sup>            | 2016 | South Korea     | 1 H, South             | 5        |        | ESKD            | Interviews      | Colaizzi's method              |
| Chong <sup>164</sup>         | 2016 | South Korea     | 1 H, South             | 8        |        | ESKD            | Interviews      | Content                        |
| Clarkson <sup>106</sup>      | 2010 | United States   | Oklahoma               | 10       |        | ESKD            | Interviews      | Thematic                       |
| Costa <sup>198</sup>         | 2014 | Brazil          | 3 H, Paraíba           | 26       |        | ESKD            | Interviews      | Lexical                        |
| Costantini <sup>92</sup>     | 2008 | Canada          | Ontario                | 14       |        | CKD             | Interviews      | Content                        |
| Cox <sup>148</sup>           | 2016 | United States   | 6 C, New Mexico        | 50       |        | ESKD            | Interviews      | Interpretive description       |
| Cramm <sup>219</sup>         | 2015 | The Netherlands | 1 H, Rotterdam         | 15       | 12     | ESKD            | Interviews      | Factor analysis, Q methodology |
| Cristóvão <sup>113</sup>     | 2013 | Portugal        | 1 C, Lisbon            | 20       |        | ESKD            | Interviews      | Thematic                       |
| Crowley-Matoka <sup>83</sup> | 2005 | Mexico          | 2 prog, Guadalajara    | 50       |        | Transplanted    | Interviews      | NA                             |
| Curtin <sup>265</sup>        | 2001 | United States   | Diverse                | 18       |        | ESKD            | Interviews      | Content                        |
| Curtin <sup>264</sup>        | 2002 | United States   |                        | 18       |        | ESKD            | Interviews      | Content                        |
| da Silva <sup>103</sup>      | 2016 | Brazil          | 1 C, Northeast         | 30       |        | ESKD            | Interviews      | Content and thematic           |
| da Silva <sup>338</sup>      | 2011 | Brazil          | 1 H, Rio Grande do Sul | 9        |        | ESKD            | Interviews      | Qualitative                    |
| Darrell <sup>281</sup>       | 2016 | United States   | 1 H                    | 12       |        | ESKD            | Interviews      | Giorgi's method                |

| Author                      | Year | Country         | Setting                 | Patients | Carers | Type of patient    | Data collection             | Data analysis reported         |
|-----------------------------|------|-----------------|-------------------------|----------|--------|--------------------|-----------------------------|--------------------------------|
| Davison <sup>231</sup>      | 2006 | Canada          | Alberta                 | 24       |        | ESKD               | Interviews                  | Constant comparison, iterative |
| Davison <sup>291</sup>      | 2006 | Canada          | 1 H                     | 19       |        | ESKD               | Interviews                  | inductive                      |
| de Brito <sup>89</sup>      | 2015 | Brazil          | 1 H, Minas Gerais       | 50       |        | Transplanted       | Interviews                  | Collective subject technique   |
| de Rosenroll <sup>277</sup> | 2013 | Canada          | 1 H                     |          | 10     | ESKD               | Interviews                  | Constant comparison            |
| Dekkers <sup>42</sup>       | 2005 | The Netherlands | 2 C                     | 7        |        | ESKD               | Interviews                  | Phenomenological               |
| DePasquale <sup>221</sup>   | 2013 | United States   | NP, 1 C                 | 68       | 62     | CKD                | Group interviews            | Mixed method                   |
| dos Reis <sup>155</sup>     | 2008 | Brazil          | 1 H, Sao Paulo          | 8        |        | ESKD               | Interviews                  | Content                        |
| dos Santos <sup>162</sup>   | 2011 | Brazil          | Rio de Janeiro          | 8        |        | ESKD               | Interviews                  | Grounded theory                |
| dos Santos <sup>259</sup>   | 2015 | Brazil          | 3 NP, Rio Grande do Sul | 20       |        | Transplanted       | Interviews                  | Critical incident              |
| Ekelund <sup>43</sup>       | 2010 | Sweden          | 1 C, South              | 39       | 21     | ESKD               | Interviews                  | Content                        |
| Erlang <sup>203</sup>       | 2015 | Denmark         | 1 H                     | 9        |        | CKD (Pre-dialysis) | Interviews                  | Systematic text condensation   |
| Eslami <sup>214</sup>       | 2016 | Iran            | 4 C, Isfahan            |          | 20     | ESKD               | Interviews                  | Thematic                       |
| Finnegan-John <sup>90</sup> | 2013 | United Kingdom  | 1 trust, London         | 118      | 12     | CKD/ESKD           | Interviews and focus groups | Thematic                       |
| Flores <sup>165</sup>       | 2004 | Brazil          | 1 H, Rio Grande do Sul  | 9        |        | ESKD               | Interviews                  | Content                        |
| Fraguas <sup>37</sup>       | 2008 | Brazil          | 2 H, Minas Gerais       |          | 18     | ESKD               | Interviews                  | Content                        |
| Ghadami <sup>239</sup>      | 2012 | Iran            | 1 charity, Isfahan      | 15       |        | Transplanted       | Interviews                  | Content                        |
| Giles <sup>159</sup>        | 2003 | Canada          | 1 H, urban              | 4        |        | ESKD               | Interviews                  | Thematic                       |
| Giles <sup>160</sup>        | 2005 | Canada          |                         | 4        |        | ESKD               | Interviews                  | Phenomenological               |
| Goff <sup>288</sup>         | 2015 | United States   | New Mexico              | 13       | 9      | ESKD               | Interviews                  | Thematic                       |

| Author                     | Year | Country        | Setting                 | Patients | Carers | Type of patient | Data collection               | Data analysis reported     |
|----------------------------|------|----------------|-------------------------|----------|--------|-----------------|-------------------------------|----------------------------|
| Goldane <sup>176</sup>     | 2011 | United States  | 1 C                     | 39       |        | Transplanted    | Focus groups and interviews   | Iterative analysis         |
| Gordon <sup>180</sup>      | 2007 | United States  |                         | 20       |        | Transplanted    | Diary entries                 | Thematic                   |
| Gordon <sup>84</sup>       | 2009 | United States  | 2 H, Illinois, New York | 82       |        | Transplanted    | Interviews                    | Thematic                   |
| Gricio <sup>114</sup>      | 2009 | Brazil         | 1 H, Sao Paulo          | 20       |        | ESKD            | Interviews                    | Thematic                   |
| Gullick <sup>339</sup>     | 2016 | Australia      | 1 H, Sydney             | 11       | 5      | ESKD            | Interviews                    | Hermeneutic interpretation |
| Hagren <sup>282</sup>      | 2001 | Sweden         | 1 H                     | 15       |        | ESKD            | Interviews                    | Content                    |
| Hagren <sup>115</sup>      | 2005 | Sweden         | 3 H                     | 41       |        | ESKD            | Interviews                    | Content                    |
| Hain <sup>189</sup>        | 2011 | United States  | 6 C, Southeast          | 56       |        | ESKD            | Interviews                    | Story inquiry method       |
| Hanson <sup>70</sup>       | 2016 | Australia      | 1 C, West               | 20       |        | ESKD            | Interviews                    | Thematic                   |
| Harrington <sup>283</sup>  | 2016 | United Kingdom | 8 H                     | 24       |        | Transplanted    | Interviews                    | Thematic                   |
| Harwood <sup>270</sup>     | 2014 | Canada         | 1 H                     | 13       |        | ESKD            | Interviews                    | Content                    |
| Harwood <sup>248</sup>     | 2005 | United Kingdom | 1 H, London             | 11       |        | CKD/ESKD        | Interviews                    | Content                    |
| Haspeslagh <sup>240</sup>  | 2013 | Belgium        | 1 H, Leuven             | 31       |        | Transplanted    | Interviews and questionnaires | Thematic                   |
| Heiwe <sup>137</sup>       | 2003 | Sweden         | 1 H, Karolinska         | 16       |        | ESKD            | Interviews                    | Contextual                 |
| Heiwe <sup>140</sup>       | 2004 | Sweden         | 1 H, Karolinska         | 16       |        | CKD/ESKD        | Interviews                    | Contextual                 |
| Herbias <sup>116</sup>     | 2016 | Chile          | 1 C, Santiago           | 12       |        | ESKD            | Interviews                    | Streubert's method         |
| Herlin <sup>284</sup>      | 2010 | Sweden         | 3 C                     | 9        |        | ESKD            | Interviews                    | Giorgi's method            |
| Hollingdale <sup>227</sup> | 2008 | United Kingdom |                         | 20       |        | CKD/ESKD        | Focus groups                  | Framework approach         |
| Hong <sup>120</sup>        | 2017 | Singapore      | 1 H                     | 14       |        | ESKD            | Interviews                    | Thematic                   |
| Horigan <sup>138</sup>     | 2013 | United States  | 1 C, Mid Atlantic       | 14       |        | ESKD            | Interviews                    | Content                    |



| Author                        | Year | Country        | Setting                | Patients | Carers | Type of patient        | Data collection           | Data analysis reported            |
|-------------------------------|------|----------------|------------------------|----------|--------|------------------------|---------------------------|-----------------------------------|
| Hutchison <sup>290</sup>      | 2017 | Canada         | 1 clinic, urban        | 9        | 16     | CKD/ESKD               | Interviews                | Interpretive description          |
| Iles-Smith <sup>232</sup>     | 2005 | United Kingdom | 1 C, Manchester        | 10       |        | CKD (Pre-dialysis)     | Interviews                | Thematic                          |
| Johnston <sup>128</sup>       | 2012 | United Kingdom | 1 trust, London        | 9        |        | ESKD                   | Interviews                | Thematic                          |
| Kaba <sup>340</sup>           | 2007 | Greece         | 2 H, Athens            | 23       |        | ESKD                   | Interviews                | Qualitative                       |
| Kahn <sup>35</sup>            | 2015 | United States  | 2 NP, New York         | 34       |        | CKD                    | Interviews                | Thematic                          |
| Karamanidou <sup>15</sup>     | 2014 | United Kingdom | 1 C, London            | 7        |        | ESKD                   | Interviews                | Interpretative,<br>phenomenologic |
| Kazley <sup>44</sup>          | 2015 | United States  | 1 C, Southeast<br>East | 20       |        | CKD/ESKD               | focus groups              | Thematic                          |
| Keeping <sup>73</sup>         | 2001 | Canada         |                        | 8        |        | ESKD                   | Interviews                | Thematic                          |
| Kierans <sup>167</sup>        | 2001 | Ireland        |                        | 5        |        | ESKD                   | Interviews, life stories  | Phenomenological                  |
| Kierans <sup>166</sup>        | 2005 | Ireland        |                        | 5        |        | CKD/ESKD               | Interviews                | Phenomenological                  |
| Kierans <sup>125</sup>        | 2013 | Mexico         | 1 H, Jalisco           | 51       | 87     | CKD/ESKD, transplanted | Interviews, observation * | Ethnographic approach             |
| King <sup>91</sup>            | 2002 | United Kingdom | 1 C                    | 22       |        | CKD/ESKD               | Interviews                | Template approach                 |
| Knihs <sup>168</sup>          | 2013 | Brazil         | 1 C, South             | 20       |        | ESKD                   | Interviews                | Content                           |
| Krespi-Boothby <sup>147</sup> | 2004 | United Kingdom | 1 H, 4 C               | 16       |        | ESKD                   | Interviews                | Thematic                          |
| Krespi-Boothby <sup>151</sup> | 2013 | United Kingdom | 1 H, 4 C               | 16       |        | ESKD                   | Interviews                | Template approach                 |
| Ladin <sup>202</sup>          | 2016 | United States  | 2 C, Massachusetts     | 23       |        | ESKD                   | Interviews                | Thematic                          |
| Ladin <sup>269</sup>          | 2017 | United States  | 2 C, Massachusetts     | 31       |        | ESKD                   | Interviews                | Thematic Nutbeam's framework      |
| Landreneau <sup>274</sup>     | 2006 | United States  | 1 C, 1 NP, South       | 6        |        | ESKD                   | Interviews                | Colaizzi's method                 |
| Landreneau <sup>278</sup>     | 2007 | United States  | 2 C, South             | 12       |        | ESKD                   | Interviews                | Colaizzi's method                 |

| Author                     | Year | Country         | Setting                | Patients | Carers | Type of patient | Data collection             | Data analysis reported     |
|----------------------------|------|-----------------|------------------------|----------|--------|-----------------|-----------------------------|----------------------------|
| Lawrence <sup>169</sup>    | 2013 | United Kingdom  | 1 C                    | 10       |        | ESKD            | Interviews                  | Conceptual and categorical |
| Lederer <sup>266</sup>     | 2015 | United States   | 1 C                    | 32       |        | CKD/ESKD        | Interviews                  | Thematic                   |
| Lee <sup>223</sup>         | 2008 | Denmark         | Diverse                | 27       | 18     | ESKD            | Focus groups                | Thematic                   |
| Lee <sup>45</sup>          | 2016 | Singapore       | 1 organisation         |          | 20     | ESKD            | Interviews                  | Thematic                   |
| Lenci <sup>256</sup>       | 2012 | United States   |                        | 4        |        | ESKD            | Interviews                  | Thematic                   |
| Leung <sup>181</sup>       | 2007 | Hong Kong       | 1 C                    | 12       |        | Transplanted    | Interviews                  | Content                    |
| Lewis <sup>285</sup>       | 2015 | United Kingdom  | 14 H                   | 40       |        | ESKD            | Interviews                  | Grounded theory            |
| Lin <sup>190</sup>         | 2015 | Taiwan          | 1 C, S, rural          | 15       |        | ESKD            | Interviews                  | Constant comparison        |
| Lindberg <sup>46</sup>     | 2008 | Sweden          | 1 C, mid country       | 10       |        | ESKD            | Interviews                  | Content                    |
| Lindberg <sup>262</sup>    | 2013 | Sweden          | 1 C, mid country       | 10       |        | ESKD            | Interviews                  | Content                    |
| Lindsay <sup>280</sup>     | 2014 | Australia       | 1 C, Sydney            | 7        |        | ESKD            | Interviews                  | Thematic                   |
| Llewellyn <sup>271</sup>   | 2014 | United Kingdom  | 4 C, London            | 19       |        | ESKD            | Interviews                  | Thematic                   |
| Lo <sup>129</sup>          | 2016 | Australia       | 4 H, Melbourne, Sydney | 58       |        | CKD/ESKD        | Interviews and focus groups | Thematic                   |
| Lopes <sup>170</sup>       | 2014 | Brazil          | 1 C, Santa Catarina    | 12       |        | ESKD            | Interviews                  | Interpretative             |
| Lopez-Vargas <sup>94</sup> | 2014 | Australia       | 3 C, New South Wales   | 38       |        | CKD             | Focus groups                | Thematic                   |
| Lopez-Vargas <sup>93</sup> | 2016 | Australia       | 3 C, New South Wales   | 38       |        | CKD/ESKD        | Focus groups                | Thematic                   |
| Lovink <sup>217</sup>      | 2015 | The Netherlands | 1 C                    | 12       |        | ESKD            | Interviews                  | Content                    |
| Low <sup>161</sup>         | 2014 | United Kingdom  | 5 C, Southeast         |          | 26     | ESKD            | Interviews                  | Thematic                   |
| Machado <sup>149</sup>     | 2003 | Brazil          | Sao Paulo              | 18       |        | ESKD            | Interviews                  | Discourse                  |
| Marques <sup>228</sup>     | 2014 | Brazil          | Paraná                 |          | 10     | ESKD            | Interviews                  | Content                    |

| Author                         | Year | Country        | Setting                               | Patients | Carers | Type of patient | Data collection | Data analysis reported    |
|--------------------------------|------|----------------|---------------------------------------|----------|--------|-----------------|-----------------|---------------------------|
| Martin-McDonald <sup>194</sup> | 2003 | Australia      | 5 C                                   | 10       |        | ESKD            | Interviews      | Thematic                  |
| Martin-McDonald <sup>195</sup> | 2003 | Australia      | 1 C                                   | 10       |        | ESKD            | Interviews      | Thematic                  |
| Mason <sup>95</sup>            | 2007 | United Kingdom | 1 C                                   | 9        | 5      | CKD             | Focus groups    | Framework approach        |
| McCarthy <sup>163</sup>        | 2010 | Australia      | 1 H                                   | 5        |        | ESKD            | Interviews      | Sequential                |
| McKillop <sup>267</sup>        | 2013 | United Kingdom | Clinics                               | 10       |        | CKD             | Interviews      | Thematic                  |
| Mercado-Martínez <sup>49</sup> | 2014 | Mexico         | Jalisco, San Luis Potosí              | 21       |        | Transplanted    | Interviews      | Thematic                  |
| Mercado-Martínez <sup>48</sup> | 2015 | Brazil         | 1 H, South                            | 11       | 5      | ESKD            | Interviews      | Content                   |
| Mercado-Martínez <sup>47</sup> | 2015 | Mexico         | Public H and<br>institutions, Jalisco | 37       | 50     | ESKD            | Interviews      | Content                   |
| Mitchell <sup>205</sup>        | 2009 | United Kingdom | 1 C                                   | 10       |        | CKD/ESKD        | Interviews      | Content                   |
| Molzahn <sup>294</sup>         | 2012 | Canada         | middle size city                      | 14       |        | CKD             | Interviews      | Thematic                  |
| Moran <sup>204</sup>           | 2009 | Ireland        | 1 H                                   | 16       |        | ESKD            | Interviews      | Interpretive              |
| Moran <sup>150</sup>           | 2009 | Ireland        | 1 H                                   | 16       |        | ESKD            | Interviews      | Interpretive              |
| Moran <sup>133</sup>           | 2011 | Ireland        | H                                     | 16       |        | ESKD            | Interviews      | Interpretative            |
| Morton <sup>79</sup>           | 2010 | Australia      | diverse                               | 95       |        | ESKD            | Interviews      | Thematic                  |
| Muduma <sup>96</sup>           | 2016 | United Kingdom | 2 C                                   | 37       |        | Transplanted    | Focus groups    | Qualitative               |
| Nagpal <sup>218</sup>          | 2017 | United States  | 1 C, New York                         | 36       |        | ESKD            | Interviews      | Coding                    |
| Namiki <sup>220</sup>          | 2010 | Australia      | 1 H                                   | 4        |        | ESKD            | Interviews      | Thematic                  |
| Niu <sup>196</sup>             | 2017 | China          | 1 C, Jiangsu                          | 23       |        | ESKD            | Interviews      | Continuous comparison     |
| Nobahar <sup>67</sup>          | 2016 | Iran           | 1 H, Semnan                           | 8        | 12     | ESKD            | Interviews      | Graneheim Lundman Content |

| Author                           | Year | Country        | Setting               | Patients | Carers | Type of patient        | Data collection | Data analysis reported          |
|----------------------------------|------|----------------|-----------------------|----------|--------|------------------------|-----------------|---------------------------------|
| Nobahar <sup>68</sup>            | 2016 | Iran           | 1 H, Semnan           | 8        | 12     | ESKD                   | Interviews      | Granheim and Lundman's approach |
| Noble <sup>293</sup>             | 2009 | United Kingdom | 1 service, London     | 30       | 17     | ESKD                   | Interviews      | Constant comparison             |
| Noble <sup>98</sup>              | 2010 | United Kingdom | 1 service, London     | 30       | 17     | ESKD                   | Interviews      | Constant comparison             |
| Noble <sup>97</sup>              | 2012 | United Kingdom | 1 service             |          | 19     | ESKD                   | Interviews      | Constant comparison             |
| Nygaardh <sup>289</sup>          | 2011 | Sweden         | 1 C, South            |          | 12     | CKD (Pre-dialysis)     | Interviews      | Content                         |
| Nygaardh <sup>236</sup>          | 2011 | Sweden         | 1 C, South            | 20       |        | CKD                    | Interviews      | Latent Content                  |
| Malheiro Oliveira <sup>209</sup> | 2012 | Brazil         | Bahia                 | 19       |        | ESKD                   | Interviews      | Categorical                     |
| Orr <sup>182</sup>               | 2007 | United Kingdom | 1 C                   | 26       |        | Transplanted           | Focus groups    | Thematic                        |
| Orr <sup>183</sup>               | 2007 | United Kingdom | 1 C                   | 26       |        | Transplanted           | Focus groups    | Thematic                        |
| Oyegbile <sup>65</sup>           | 2016 | Nigeria        | 2 H, Southwest        |          | 15     | ESKD                   | Interviews      | Content                         |
| Pelletier-Hibbert <sup>286</sup> | 2001 | Canada         | East                  |          | 41     | ESKD                   | Focus groups    | Thematic                        |
| Piccoli <sup>224</sup>           | 2010 | Italy          | 1 H                   | 12       |        | CKD/ESKD, transplanted | Focus groups    | Not clear                       |
| Pietrovski <sup>208</sup>        | 2006 | Brazil         | 1 H, Paraná           | 15       |        | ESKD                   | Interviews      | Content                         |
| Pilger <sup>225</sup>            | 2010 | Brazil         | 1 C, Paraná           | 22       |        | ESKD                   | Interviews      | Thematic                        |
| Polaschek <sup>54</sup>          | 2003 | New Zealand    | 1 C                   | 6        |        | ESKD                   | Interviews      | Thematic                        |
| Polaschek <sup>55</sup>          | 2006 | New Zealand    | 1 regional department | 20       |        | ESKD                   | Interviews      | Thematic                        |
| Polaschek <sup>56</sup>          | 2007 | New Zealand    | 1 regional department | 20       |        | ESKD                   | Interviews      | Thematic                        |
| Prieto <sup>130</sup>            | 2011 | Spain          | Andalusia             | 22       |        | ESKD                   | Interviews      | Discourse                       |
| Rabiei <sup>141</sup>            | 2015 | Iran           | Isfaham               |          | 20     | ESKD                   | Interviews      | Thematic                        |

| Author                     | Year | Country         | Setting                                      | Patients | Carers | Type of patient | Data collection             | Data analysis reported                  |
|----------------------------|------|-----------------|----------------------------------------------|----------|--------|-----------------|-----------------------------|-----------------------------------------|
| Ravenscroft <sup>260</sup> | 2005 | Canada          | 3 C                                          | 7        |        | ESKD            | Interviews                  | Inductive                               |
| Reid <sup>268</sup>        | 2012 | United Kingdom  | 1 C, clinics                                 | 11       |        | CKD/ESKD        | Interviews                  | Thematic                                |
| Reta <sup>131</sup>        | 2014 | Spain           | 1 H, Araba                                   | 14       |        | ESKD            | Interviews                  | Content                                 |
| Richard <sup>108</sup>     | 2010 | United States   |                                              | 14       |        | ESKD            | Interviews                  | Cultural negotiation model<br>framework |
| Rifkin <sup>99</sup>       | 2010 | United States   | 1 C                                          | 20       |        | CKD/ESKD        | Interviews                  | Thematic                                |
| Rix <sup>58</sup>          | 2014 | Australia       | New South Wales, rural                       | 18       |        | ESKD            | Interviews                  | Thematic                                |
| Rix <sup>57</sup>          | 2015 | Australia       | New South Wales, rural                       | 18       | 29     | ESKD            | Interviews                  | Thematic                                |
| Rodrigues <sup>191</sup>   | 2011 | Brazil          | 1 C, South                                   | 8        |        | ESKD            | Interviews                  | Categorical                             |
| Ros <sup>244</sup>         | 2012 | United States   | 1 H, Maryland                                | 19       |        | ESKD            | Focus groups                | Thematic                                |
| Roso <sup>119</sup>        | 2013 | Brazil          | 1 H, South                                   | 15       |        | ESKD            | Narrative interviews        | Thematic                                |
| Russ <sup>229</sup>        | 2005 | United States   | 2 C, California                              | 43       |        | ESKD            | Interviews                  | Anthropologic study                     |
| Russell <sup>241</sup>     | 2003 | United States   | 1 C, Midwest                                 | 16       |        | Transplanted    | Interviews                  | Constant comparison                     |
| Rygh <sup>71</sup>         | 2012 | Norway          | North                                        | 11       |        | ESKD            | Interviews                  | Inductive, actor's point of view        |
| Sadala <sup>72</sup>       | 2012 | Brazil          | 1 H                                          | 19       |        | ESKD            | Narrative interviews        | Phenomenological, hermeneutical         |
| Sahaf <sup>222</sup>       | 2017 | Iran            | 2 H, Sari                                    | 9        |        | ESKD            | Interviews                  | Van Manem Thematic                      |
| Salvalaggio <sup>82</sup>  | 2003 | Canada          | 1 H, Ontario                                 | 12       |        | ESKD            | Interviews                  | Immersion/crystalization                |
| Schell <sup>272</sup>      | 2012 | United States   | 1 university system, 1<br>NP, North Carolina | 29       | 11     | CKD/ESKD        | Interviews and focus groups | Thematic                                |
| Schipper <sup>184</sup>    | 2014 | The Netherlands | 5 H                                          | 30       |        | Transplanted    | Focus groups and interviews | Thematic                                |

| Author                      | Year | Country        | Setting             | Patients | Carers | Type of patient | Data collection       | Data analysis reported          |
|-----------------------------|------|----------------|---------------------|----------|--------|-----------------|-----------------------|---------------------------------|
| Schmid-Mohler <sup>85</sup> | 2014 | Switzerland    | 1 H, Zurich         | 12       |        | Transplanted    | Interviews            | Content                         |
| Schober <sup>206</sup>      | 2016 | United States  | 14 States           | 48       |        | ESKD            | Interviews            | Thematic                        |
| Seah <sup>50</sup>          | 2013 | Singapore      | 3 H                 | 9        |        | ESKD            | Interviews            | Interpretative phenomenological |
| Shahgholian <sup>142</sup>  | 2015 | Iran           | 1 H, Isfahan        | 17       |        | ESKD            | Interviews            | Colaizzi's method               |
| Shaw <sup>275</sup>         | 2015 | New Zealand    | diverse             | 24       |        | ESKD            | Interviews            | Phenomenological                |
| Sheu <sup>245</sup>         | 2012 | United States  | Maryland            | 27       | 23     | ESKD            | Focus groups          | Thematic                        |
| Shih <sup>59</sup>          | 2011 | New Zealand    | 1 C, North          | 7        |        | ESKD            | Interviews            | Hermeneutical and thematic      |
| Shirazian <sup>123</sup>    | 2016 | United States  | 1 C, Northeast      | 23       |        | CKD             | focus groups          | Thematic                        |
| Sieverdes <sup>174</sup>    | 2015 | United States  | 1 C, South Carolina | 27       |        | Transplanted    | focus groups          | Thematic                        |
| Smith <sup>207</sup>        | 2010 | United States  | 2 C                 | 19       |        | ESKD            | focus groups          | Content                         |
| Spiers <sup>177</sup>       | 2015 | United Kingdom | 1 C, London         | 4        |        | Transplanted    | Interviews            | Interpretative phenomenological |
| Spiers <sup>171</sup>       | 2016 | United Kingdom | 2 online groups     | 10       |        | ESKD            | Interviews            | Thematic                        |
| Stanfill <sup>178</sup>     | 2012 | United States  | 1 C, mid-South      | 7        |        | Transplanted    | Focus groups          | Iterative                       |
| Stewart <sup>81</sup>       | 2012 | United States  | 2 C, urban          | 19       |        | ESKD            | Interviews            | Coding                          |
| Tanyi <sup>201</sup>        | 2006 | United States  | Mid-West            | 16       |        | ESKD            | Interviews            | Colaizzi's method               |
| Tanyi <sup>192</sup>        | 2008 | United States  | 2 C, mid-West       | 16       |        | ESKD            | Interviews            | Colaizzi's method               |
| Tanyi <sup>193</sup>        | 2008 | United States  | Mid-West            | 16       |        | ESKD            | Interviews            | Colaizzi's method               |
| Tavares <sup>216</sup>      | 2016 | Brazil         | 1 H, Rio de Janeiro |          | 19     | ESKD            | Interviews and groups | Content                         |
| Taylor <sup>111</sup>       | 2016 | Australia      | 2 H, Sydney         | 26       |        | ESKD            | Interviews            | Thematic                        |
| Taylor <sup>215</sup>       | 2015 | United Kingdom | 6 trusts            | 15       | 11     | ESKD            | Interviews            | Constant comparison             |

| Author                      | Year | Country         | Setting                                  | Patients | Carers | Type of patient | Data collection    | Data analysis reported       |
|-----------------------------|------|-----------------|------------------------------------------|----------|--------|-----------------|--------------------|------------------------------|
| Theofilou <sup>122</sup>    | 2013 | Greece          | 1 H, Athens                              | 10       |        | ESKD            | Interviews         | Phenomenological             |
| Thomé <sup>247</sup>        | 2011 | Brazil          | 1 H, Rio Grande do Sul                   |          | 10     | ESKD            | Interviews         | Cultural                     |
| Tielen <sup>179</sup>       | 2011 | The Netherlands | 1 C                                      | 26       |        | Transplanted    | Interviews         | Q methodology                |
| Tijerina <sup>76</sup>      | 2006 | United States   | 8 C, Texas                               | 26       |        | ESKD            | Interviews         | Coding                       |
| Tong <sup>63</sup>          | 2009 | Australia       | 4 H, Brisbane, Sydney,<br>Melbourne      | 63       |        | CKD/ESKD        | Focus groups       | Thematic                     |
| Tong <sup>152</sup>         | 2013 | Italy           | 4 C, Bari, Marsala,<br>Nissoria, Taranto | 22       | 20     | ESKD            | Interviews         | Thematic                     |
| Tong <sup>237</sup>         | 2015 | Australia       | 1 C, Adelaide                            | 15       |        | CKD/ESKD        | Interviews         | Thematic                     |
| Tonkin-Crine <sup>127</sup> | 2015 | United Kingdom  | 9 C                                      | 42       |        | ESKD            | Interviews         | Thematic                     |
| Torchi <sup>153</sup>       | 2014 | Brazil          | 1 C, Rio de Janeiro                      | 10       |        | ESKD            | Interviews         | Collective subject technique |
| Tovazzi <sup>117</sup>      | 2012 | Italy           | North                                    | 12       |        | ESKD            | Interviews         | Phenomenological             |
| Tweed <sup>109</sup>        | 2005 | United Kingdom  | 1 C, Leicester                           | 9        |        | ESKD            | Interviews         | Phenomenological             |
| Urstad <sup>242</sup>       | 2012 | Norway          | 1 C                                      | 15       |        | Transplanted    | Interviews         | Hermeneutic                  |
| Valsaraj <sup>60</sup>      | 2014 | India           | 1 H, South Karnataka                     | 10       |        | ESKD            | Interviews         | Phenomenological             |
| Velez <sup>100</sup>        | 2006 | Spain           | 1 C                                      | 12       |        | ESKD            | Interviews         | Thematic                     |
| Vestman <sup>263</sup>      | 2014 | Sweden          | 1 H                                      | 9        |        | ESKD            | Written narratives | Thematic                     |
| Visser <sup>276</sup>       | 2009 | The Netherlands | 1 C                                      | 14       |        | ESKD            | Interviews         | Thematic                     |
| Wachterman <sup>172</sup>   | 2015 | United States   | 1 C                                      | 16       |        | ESKD            | Interviews         | Thematic                     |
| Walker <sup>124</sup>       | 2012 | United Kingdom  | 1 H                                      | 9        |        | CKD             | Interviews         | Thematic                     |

| Author                      | Year | Country        | Setting                          | Patients | Carers | Type of patient | Data collection             | Data analysis reported |
|-----------------------------|------|----------------|----------------------------------|----------|--------|-----------------|-----------------------------|------------------------|
| Walker <sup>51</sup>        | 2016 | New Zealand    | 3 C                              | 43       | 9      | ESKD            | Interviews                  | Thematic               |
| Walker <sup>61</sup>        | 2016 | New Zealand    | 3 C                              | 43       | 9      | ESKD            | Interviews                  | Thematic               |
| Walker <sup>80</sup>        | 2017 | New Zealand    | 3 C                              | 13       |        | ESKD            | Interviews                  | Thematic               |
| Walton <sup>258</sup>       | 2002 | United States  | 1 H, rural, Northwest            | 11       |        | ESKD            | Interviews                  | Grounded theory        |
| Walton <sup>257</sup>       | 2007 | United States  | 1 C                              | 21       |        | ESKD            | Interviews                  | Grounded theory        |
| Weil <sup>253</sup>         | 2000 | United States  | 2 C, rural, Northwest            | 14       |        | ESKD            | Interviews                  | Thematic               |
| Wells <sup>254</sup>        | 2015 | United States  | 3 C, 1 NP, Texas                 | 17       | 17     | ESKD            | Interviews                  | Thematic               |
| Wells <sup>62</sup>         | 2015 | United States  | 3 C, 1 NP, Texas                 | 15       | 21     | ESKD            | Interviews                  | Thematic               |
| White <sup>139</sup>        | 2004 | United States  | 1 C, Colorado                    | 6        | 9      | ESKD            | Interviews                  | Thematic               |
| Wiederhold <sup>185</sup>   | 2012 | Germany        | 1 C                              | 10       |        | Transplanted    | Interviews                  | Content                |
| Wilkinson <sup>75</sup>     | 2011 | United Kingdom | Luton, West London,<br>Leicester | 48       |        | ESKD            | Interviews                  | Thematic               |
| Wilkinson <sup>233</sup>    | 2014 | United Kingdom | 4 C                              | 16       | 45     | Transplanted    | Interviews and focus groups | Thematic               |
| Wilkinson <sup>74</sup>     | 2016 | United Kingdom | 4 C                              | 16       | 45     | ESKD            | Interviews and focus groups | Thematic               |
| Williams <sup>101</sup>     | 2009 | Australia      | 2 H                              | 20       |        | CKD             | Interviews                  | Qualitative            |
| Williams <sup>102</sup>     | 2008 | Australia      | 2 H, Melbourne                   | 23       |        | CKD             | Interviews and focus groups | Interpretative         |
| Williams <sup>261</sup>     | 2009 | Australia      | 1 H, Melbourne                   | 23       |        | CKD             | Interviews                  | Qualitative            |
| Wilson <sup>255</sup>       | 2015 | United Kingdom | 3 C                              | 15       | 15     | ESKD            | Focus groups                | Thematic               |
| Winterbottom <sup>230</sup> | 2012 | United Kingdom | 1 C, Northern England            | 20       |        | CKD             | Interviews                  | Thematic               |
| Wu <sup>66</sup>            | 2015 | Taiwan         | 2 C, Central                     | 15       |        | ESKD            | Interviews                  | Thematic               |



1  
2  
3  
4  
5  
6  
7  
8  
9  
10  
11  
12  
13  
14  
15  
16  
17  
18  
19  
20  
21  
22  
23  
24  
25  
26  
27  
28  
29  
30  
31  
32  
33  
34  
35  
36  
37  
38  
39  
40  
41  
42  
43  
44  
45  
46  
47

| Author                      | Year | Country     | Setting        | Patients | Carers | Type of patient | Data collection | Data analysis reported |
|-----------------------------|------|-------------|----------------|----------|--------|-----------------|-----------------|------------------------|
| Xi <sup>110</sup>           | 2011 | Canada      | 1 C, Ontario   | 13       |        | ESKD            | Interviews      | Thematic               |
| Xi <sup>158</sup>           | 2013 | Canada      | 1 C, Ontario   | 10       |        | ESKD            | Interviews      | Thematic               |
| Yeun <sup>143</sup>         | 2016 | South Korea | 1 H, Seoul     |          | 33     | ESKD            | Interviews      | Q methodology          |
| Yngman-Uhlin <sup>135</sup> | 2010 | Sweden      | Southeast      | 14       |        | ESKD            | Interviews      | Phenomenological       |
| Yngman-Uhlin <sup>132</sup> | 2016 | Sweden      | 1 H, Southeast | 8        |        | ESKD            | Interviews      | Content                |
| Yodchai <sup>249</sup>      | 2016 | Thailand    | 2 H, Songkhla  | 20       |        | ESKD            | Interviews      | Qualitative            |
| Yodchai <sup>199</sup>      | 2012 | Thailand    | 1 C, South     | 5        |        | ESKD            | Interviews      | Grounded Theory        |
| Yu <sup>112</sup>           | 2014 | Singapore   | NKF            | 32       |        | ESKD            | Interviews      | Thematic               |
| Yumang <sup>144</sup>       | 2009 | Canada      | 1 H, Quebec    | 9        |        | ESKD            | Interviews      | Colaizzi's method      |
| Ziegert <sup>213</sup>      | 2001 | Sweden      |                |          | 12     | ESKD            | Interviews      | Pragmatic approach     |
| Ziegert <sup>211</sup>      | 2006 | Sweden      | Southwest      |          | 13     | ESKD            | Interviews      | Content                |
| Ziegert <sup>212</sup>      | 2009 | Sweden      | Southwest      |          | 20     | ESKD            | Interviews      | Content                |

For peer review only

**Table 3. Illustrative quotations**

---

**Structural inequalities**

---

[Undocumented immigrant in US without access to scheduled haemodialysis] When you enter through the emergency department, you arrive in bad shape...you need to have a high potassium or they send you home even though you feel you are dying. Sometimes, you crawl out when they decide to not do dialysis. You eat a banana because it is high in potassium even though you may die and you go back and wait and hope that they will do dialysis so that you don't feel like you are drowning and so that the anxiety goes away. (American patient).<sup>52</sup>

My mother got some help from DIF (Mexican social assistance office), it was five haemodialysis sessions; when there was no session left, we went to a private centre, there is a foundation there and they helped us... they gave me eight sessions. After that, my mom went to DIF in Zapopan again and they sent us to DIF in Guadalajara. We got some help there (Mexican patient without coverage).<sup>47</sup>

---

**Workload**

---

Sometimes I have to sit and wait at least an hour and I have to call and say my ride is not here yet, which makes me late getting there, which makes me late getting on the machine, which makes me late getting off the machine. And then... coming to pick you up, if you're not ready when they get there, they will leave you and you'll have to sit and wait and wait and wait (American patient).<sup>86</sup>

It is always in the back of your mind that it [the transplant] will fail, at times. And I think if anything that makes you more inclined to comply with your treatment, comply with your medication because at the end of the day if, you know, if you do the utmost that you can and you take your medicine and you go to your follow up appointments, then there's hopefully less chance of it failing in the long run. (Woman, 3 years+ post- transplant).<sup>175</sup>

I suppose mine being genetic. It's been very difficult to find what kind of diet you're supposed to follow. You read one bit of information and it tells you this and you read another bit and it tells you don't eat that, which the other one said you must eat. there's no clear guideline on what it is you can or can't eat. (Man, 38 years, CKD stage 3).<sup>94</sup>

It was a lot more work because of all the things that you had to learn... I don't eat out anymore... It's tough taking so many pills (Patient with CKD).<sup>92</sup>

---

---

**Capacity**

---

Before she left (pause) when everything was happy and happy sort of thing, you know, I think it was- she was going to give a kidney to somebody else and somebody else was going to give a kidney to somebody and somebody was going to give a kidney to me – like a triangle... she was willing to do that. It didn't happen, um (pause) 'cos she left (UK patient).<sup>39</sup>

it's a kind of tiredness that you wouldn't wish on your worst enemy ... when you can't read, you're too tired to watch the telly, you're too tired to do anything, because your brain is so tired like all of you ... it feels like you're kind of hollow inside ... like it's only a kind of shell that's functioning.<sup>137</sup>

Well about five years ago, I went to the hospital because I wasn't feeling good and they took my blood pressure and it was 200 over something....Then while they were trying to get my blood pressure down, they said something about my kidneys. And I didn't know the connection between high blood pressure and kidneys. (Evan, African American male, 50, CKD Stage 3).<sup>35</sup>

It wasn't till about 2 years ago, until I fully understood and I've had the kidney disease from the age of 15, what exactly my [kidney] function was and I got a fright. No one had ever told me.' (Man, 38 years, CKD stage 3).<sup>94</sup>

---

**Control and decision making**

---

I have free reign of whatever days I want to take off. They don't tell me when I have to dialyse or when I can't dialyse. Everything is under my control. That's what I like (talking on home dialysis, patient from Canada).<sup>158</sup>

If I'm going to feel this bad for the rest of my life, do I just want to end it now? (Woman, 40s, CKD stage 4).<sup>63</sup>

---

**Carers' involvement**

---

I just sit here like a robot. Nurses asked me to buy items that my mother needed. They never told me why she needed them. They ordered me to pay for dialysis, laboratory investigations and other things. I don't like it when I do not know the reason behind my actions. I am sad to see myself as a fool being tossed around (Caregiver from Nigeria).<sup>65</sup>

---

**End-of-life**

---

Then [the home care nurse] said 'Well you haven't got to go on. We'll make it quite peaceful for you to pass on.' They can tell you, but it's your body. It's up to me to decide what I want to do' (Patient from UK).<sup>205</sup>

---

1  
2  
3  
4  
5  
6 I have heard [about] a lot of people that died on dialysis and had strokes on dialysis . . . Once I sit down there, I don't know whether I'm gonna come out alive or dead. (Berta, age  
7 45, blind amputee, dialysis patient for 18 months).<sup>76</sup>  
8

9 "I think about [death] everyday. I mean you can't help it. I know that it is a terminal illness and it's not going to get better and that there is only one way out.(Wife of a Canadian  
10 patient on peritoneal dialysis).<sup>286</sup>  
11

12  
13  
14  
15  
16  
17  
18  
19  
20  
21  
22  
23  
24  
25  
26  
27  
28  
29  
30  
31  
32  
33  
34  
35  
36  
37  
38  
39  
40  
41  
42  
43  
44  
45  
46  
47

For peer review only

1  
2  
3  
4  
5  
6  
7  
8  
9  
10  
11  
12  
13  
14  
15  
16  
17  
18  
19  
20  
21  
22  
23  
24  
25  
26  
27  
28  
29  
30  
31  
32  
33  
34  
35  
36  
37  
38  
39  
40  
41  
42  
43  
44  
45  
46  
47

**Table 4: Summary of results**

| Qualitative Analysis           |                           |                                                                                                                                                                                                                                                                                                                                                                                                                                                                                                                                                                                                                                                                                                                                                                                                                                                                                                           |
|--------------------------------|---------------------------|-----------------------------------------------------------------------------------------------------------------------------------------------------------------------------------------------------------------------------------------------------------------------------------------------------------------------------------------------------------------------------------------------------------------------------------------------------------------------------------------------------------------------------------------------------------------------------------------------------------------------------------------------------------------------------------------------------------------------------------------------------------------------------------------------------------------------------------------------------------------------------------------------------------|
| Primary category               | Secondary category        | Summary results                                                                                                                                                                                                                                                                                                                                                                                                                                                                                                                                                                                                                                                                                                                                                                                                                                                                                           |
| <b>Structural disadvantage</b> | <i>Access to care.</i>    | Socio-economic status is central to experience of CKD. <sup>35 37-63 125</sup><br>Treatment costs were major obstacle to care <sup>47-49 64 125</sup> as was limited access to healthcare for the un- or under-insured. <sup>35 40 48 50 52 60 67 68</sup><br>Transplants, dialysis and drug treatments were often beyond the reach of low-income patients. <sup>35 47-49 66 83-85 125</sup><br>Un- or under-insured people experienced increased dependence on emergency care. <sup>35 47-49 52 66</sup><br>Poorly funded or unfunded healthcare was often fragmented and of indeterminate duration. <sup>47 48 64</sup><br>For non-native speakers, language was an important barrier for having a discussion with care providers. <sup>53 74-76</sup><br>Patients were often poorly informed about disease progression and treatment options. <sup>38 50 57 58 63 64 125 127-129 188 205 219-222</sup> |
|                                | <i>Housing</i>            | Homelessness, unsuitable housing, lack of utilities (electricity, clean running water) are critical to self-care and home dialysis. <sup>51 61 70 86</sup>                                                                                                                                                                                                                                                                                                                                                                                                                                                                                                                                                                                                                                                                                                                                                |
|                                | <i>Employment status.</i> | Loss of employment may lead to un- or under-insurance that limits or prevents access to treatment. <sup>35 39 45 52 60 69 72 87-91</sup>                                                                                                                                                                                                                                                                                                                                                                                                                                                                                                                                                                                                                                                                                                                                                                  |
| <b>Workload</b>                | <i>Self-care.</i>         | Complex medication regimens were managed through dispensing aids, associated activities, family support. <sup>40 46 71 86 92-103</sup><br>When taking care of their vascular access, patients made efforts to protect the arm. <sup>108 111</sup><br>Patients controlled their diets and fluid intake, and managed food cravings and thirst. <sup>63 112</sup><br>Many modified social activities to minimise exposure to hot weather, temptation, and social pressure. <sup>112 118-120</sup><br>Women could face family conflicts if they followed prescribed diets. <sup>45 62 121-124</sup><br>Restrictive diets were sometimes stigmatized as a sign of poverty. <sup>121</sup>                                                                                                                                                                                                                      |

|                                            |                                                                                                                                                                                                                                                                                                                                                                                                                                                                                                                                                                                   |
|--------------------------------------------|-----------------------------------------------------------------------------------------------------------------------------------------------------------------------------------------------------------------------------------------------------------------------------------------------------------------------------------------------------------------------------------------------------------------------------------------------------------------------------------------------------------------------------------------------------------------------------------|
| <i>Navigating health care structures.</i>  | <p>When pathways in system were not established, patients and carers had to identify institutions to obtain treatment and laboratory results.<sup>48 49 125 161</sup></p> <p>In settings with healthcare coverage, socio-economically disadvantaged patients found it difficult to access financial support.<sup>51</sup></p> <p>Lack of continuity of care contributed to patients using services without sufficient expertise in CKD.<sup>49 101</sup></p> <p>The efficiency focus of medical system was perceived as a barrier to a personal connection.<sup>173 102</sup></p> |
| <i>Negotiating costs and fund-raising.</i> | <p>Fund-raising was important for those who were un- or under-insured, sold goods or services, organised raffles, or obtained loans.<sup>47-49 125</sup></p> <p>Patients contacted centres, other patients, and organisations to ask for free treatment when they were un – or under-insured.<sup>47 49 52 125 217 218</sup></p>                                                                                                                                                                                                                                                  |
| <i>Travel and time management.</i>         | <p>Patients often travelled for long distances to dialysis centres, 3 times a week.<sup>15 47-49 53 76 86 126-133</sup></p> <p>Home dialysis patients had to pay transport to training, appointments, and other check-ups.<sup>53 61 69-72</sup></p> <p>Patients arranged daily activities between sessions, adjusted activities to their fatigue, and tried to schedule medical appointments all on one day.<sup>55 134-145</sup></p> <p>Parents arranged child-care while they were in sessions or when they were tired.<sup>49 53 55 154 155</sup></p>                         |
| <i>Home dialysis.</i>                      | <p>Training was required with extended periods off work.<sup>61 70 156-158</sup></p> <p>Homes needed physical adaptation, carers invested efforts in maintaining cleanliness and hygiene.<sup>152 158-162</sup></p> <p>Specific tasks were managing treatment at set times, recording blood pressure and body weight, titrating medications, adopting aseptic techniques.<sup>156 157 163</sup></p>                                                                                                                                                                               |
| <i>Pre-transplant adaptation.</i>          | <p>Patients adjusted to being on transplant waiting-list, prepared for transplant from a deceased donor at any time.<sup>43 115 133 164-170</sup></p> <p>Specific adjustment tasks included: hospital visits, tests, and organizing payment for treatment.<sup>132 133 164 165 170-173</sup></p> <p>Some people needed to negotiate donation of a kidney by living relatives or others.<sup>39 47 164 174</sup></p>                                                                                                                                                               |
| <i>Post-transplant adjustment.</i>         | <p>Transplanted patients managed complex medication regimens, balanced against the need to re-enter the labour market to pay off loans.<sup>84 85 175-180</sup></p> <p>Post-transplant, patients needed to manage relationships, finances, and family responsibilities in context of prognostic uncertainty<sup>83 85 175-</sup></p>                                                                                                                                                                                                                                              |

1  
2  
3  
4  
5  
6  
7  
8  
9  
10  
11  
12  
13  
14  
15  
16  
17  
18  
19  
20  
21  
22  
23  
24  
25  
26  
27  
28  
29  
30  
31  
32  
33  
34  
35  
36  
37  
38  
39  
40  
41  
42  
43  
44  
45  
46  
47

|                              |                                             |                                                                                                                                                                                                                                                                         |
|------------------------------|---------------------------------------------|-------------------------------------------------------------------------------------------------------------------------------------------------------------------------------------------------------------------------------------------------------------------------|
|                              |                                             | 177 181-186                                                                                                                                                                                                                                                             |
| <b>Capacity</b>              | <i>Physical and mental capacity</i>         | Daily activities were limited by symptoms associated with dialysis (pain, fatigue, anxiety, and depression). <sup>37 44 55 63 90 96 138 140 154 187-199</sup>                                                                                                           |
|                              |                                             | Symptoms were sometimes overlooked by health professionals. <sup>58 94 101 202-204</sup>                                                                                                                                                                                |
|                              |                                             | When in poor health, patients relied on wider networks for food preparation, transportation, shopping, ordering supplies, symptom management, and training. <sup>37 118 161 205-208</sup>                                                                               |
|                              |                                             | Carers were involved in the treatment, accompanying patients to dialysis and responding to psychosocial needs. <sup>45 69 97 129 141 143 161 210-215</sup>                                                                                                              |
| <b>Managing Information.</b> | <i>Managing Information.</i>                | Information on disease and treatment was often insufficient or difficult to comprehend, particularly during early stages. <sup>61 77 92 109 121 130 131</sup>                                                                                                           |
|                              |                                             | <sup>223-227</sup> Short clinic visits, jargon, and anxiety were barriers to accessing information. <sup>61 102 223 231-234</sup>                                                                                                                                       |
|                              |                                             | For organ donation and transplantation, patients relied on information from other patients, health professionals, social workers, financial representatives, meetings and the internet. <sup>117 174 235-238</sup>                                                      |
|                              |                                             | Information about the effects and side-effects of immunosuppression was important but hard to come by. <sup>178 184 185 239-242</sup>                                                                                                                                   |
|                              |                                             | Stress and urgency affected how people with CKD processed information provided by healthcare professionals. <sup>240 242-245</sup>                                                                                                                                      |
| <b>Social support.</b>       | <i>Social support.</i>                      | Support from friends, family, neighbours, health professionals and other patients was essential. <sup>39 44 60 62 215 247 252-256</sup> Lack of social support was a frequently reported problem. <sup>44 60 247 259</sup>                                              |
|                              |                                             | Patients ought to maintain a sense of normalcy, integrating dialysis community into their network. <sup>42 139 210 260</sup>                                                                                                                                            |
|                              |                                             | Younger patients sometimes considered home dialysis as an opportunity for employment and contact with social networks. <sup>61 152</sup>                                                                                                                                |
| <b>Experienced control</b>   | <i>Personal control and decision-making</i> | When clinicians failed to discuss care, eligibility for transplant, and potential donors, patients felt disempowered. <sup>39 55 57 58 77 78 169 282</sup>                                                                                                              |
|                              |                                             | When relatives offered to donate a kidney, many patients were reluctant to accept because of concerns on future health of donor; other patients had reservations about kidneys from deceased donors because of the donor's age, medical history. <sup>172 181 235</sup> |
|                              |                                             | Once transplanted, main clinical objective was preserving the graft. <sup>49 63 89 96 167 283-285</sup>                                                                                                                                                                 |
| <b>Carers' involvement.</b>  | <i>Carers' involvement.</i>                 | Carers needed more information on dialysis techniques to feel confident, stressed the importance of 24-hour telephone support, wanted to be involved in decision-making as dialysis would also affect them. <sup>55 70 111 156-158 223 279 286</sup>                    |
|                              |                                             | When carers perceived patient was in pain with no response to treatment, they sometimes yearned for the patient's freedom of this                                                                                                                                       |

|                               |                                                                                                                                                                                                                                                                                                                                                                                                                                                                                                                                                                                                                              |
|-------------------------------|------------------------------------------------------------------------------------------------------------------------------------------------------------------------------------------------------------------------------------------------------------------------------------------------------------------------------------------------------------------------------------------------------------------------------------------------------------------------------------------------------------------------------------------------------------------------------------------------------------------------------|
|                               | condition through a peaceful death. <sup>134 141 161</sup>                                                                                                                                                                                                                                                                                                                                                                                                                                                                                                                                                                   |
| <i>End-of-life decisions.</i> | <p>Patients and carers emphasised self-determination, autonomy and dignity.<sup>134 136 205 251 294</sup></p> <p>End-of-life decisions were influenced by ideas about personal fulfilment, nature taking its course, fears of dependence, or of dialysis accelerating death.<sup>128 293</sup> Decisions often passed to trusted carers or professionals.<sup>290-292</sup></p> <p>Acceptance of decisions was influenced by treatment modality, patient age, and ineffectiveness of haemodialysis.<sup>64 128 134 161</sup></p> <p>Families emphasized importance of respecting patients' wishes.<sup>202 233 292</sup></p> |



**Table 5. Main challenges related to burden of treatment**

| Challenge                                                                                                            | Group of patient mostly affected | Type of country mostly affected | Severity |
|----------------------------------------------------------------------------------------------------------------------|----------------------------------|---------------------------------|----------|
| Limited access to healthcare for the un- or under-insured.                                                           | CKD, ESKD                        | LMIC                            | +++      |
| Dialysis, transplant surgery, immunosuppressive drugs were often beyond the reach of low-income patients.            | ESKD                             | LMIC                            | +++      |
| Healthcare was often fragmented and of indeterminate duration for the un- or under-insured.                          | CKD, ESKD                        | LMIC                            | +++      |
| In settings with healthcare coverage, socially disadvantaged patients found it difficult to access financial support | CKD, ESKD                        | HIC                             | ++       |
| Fund-raising was important for those who were un- or under-insured                                                   | ESKD                             | LMIC                            | +++      |
| For non-native speakers, language was an important barrier for having a discussion with care providers.              | CKD, ESKD                        | LMIC, HIC                       | ++       |
| Patients were often poorly informed about disease progression and treatment options.                                 | CKD, ESKD                        | LMIC, HIC                       | ++       |
| Patients and carers had to identify institutions to obtain diagnosis, laboratory results, and treatment.             | CKD, ESKD                        | LMIC                            | ++       |
| Homelessness, unsuitable housing, lack of utilities, critical to self-care and home dialysis.                        | ESKD                             | HIC, LMIC                       | ++       |
| Loss of employment may lead to un- or under-insurance limiting or preventing access to treatment.                    | ESKD                             | HIC, LMIC                       | +++      |
| Complex medication regimens were managed through dispensing aids, associated activities, family support.             | CKD, ESKD                        | HIC, LMIC                       | +        |
| When taking care of their vascular access, patients made efforts to protect the arm.                                 | ESKD                             | HIC, LMIC                       | +        |
| Patients controlled diets and fluid intake, modified social activities to minimise exposure and pressure.            | CKD, ESKD                        | HIC, LMIC                       | ++       |
| Patients often travelled for long distances to dialysis centres, 3 times a week.                                     | ESKD                             | HIC, LMIC                       | ++       |
| Home dialysis patients had to pay transport to training, appointments, and other check-ups.                          | ESKD                             | HIC, LMIC                       | ++       |
| Patients arranged daily activities between sessions.                                                                 | ESKD                             | HIC, LMIC                       | +        |
| For home dialysis, training was required with extended periods off work.                                             | ESKD                             | HIC, LMIC                       | +        |
| For home dialysis, homes needed physical adaptation.                                                                 | ESKD                             | HIC, LMIC                       | +        |

| Challenge                                                                                                              | Group of patient mostly affected | Type of country mostly affected | Severity |
|------------------------------------------------------------------------------------------------------------------------|----------------------------------|---------------------------------|----------|
| For home dialysis, tasks were managing treatment, monitoring, titrating medications, adopting aseptic techniques.      | ESKD                             | HIC, LMIC                       | ++       |
| Pre-transplantation, specific adjustment tasks included: hospital visits, tests, and organizing payment for treatment. | ESKD                             | HIC, LMIC                       |          |
| Some people needed to negotiate donation of a kidney by living relatives or others.                                    | ESKD                             | HIC, LMIC                       | ++       |
| Transplanted patients managed complex medication regimens.                                                             | ESKD                             | HIC, LMIC                       | +        |
| Transplanted patients needed to manage relationships, finances, and family responsibilities                            | ESKD                             | HIC, LMIC                       | ++       |
| Symptoms associated with dialysis limited daily activities, sometimes overlooked by health professionals.              | ESKD                             | HIC, LMIC                       | ++       |
| When in poor health, wider networks were necessary for daily activities, transportation, symptom management.           | ESKD                             | HIC, LMIC                       | ++       |
| Information on disease and treatment was often insufficient or difficult to comprehend.                                | ESKD                             | HIC, LMIC                       | ++       |
| Information about immunosuppression was hard to obtain .                                                               | ESKD                             | HIC, LMIC                       | ++       |
| Lack of social support was a frequently reported problem.                                                              | ESKD                             | HIC, LMIC                       | ++       |
| Many clinicians failed to discuss care, eligibility for transplant, and potential donors.                              | CKD, ESKD                        | HIC, LMIC                       | ++       |
| Carers needed more information on dialysis techniques to feel confident.                                               | ESKD                             | HIC                             | +        |
| Patients and carers emphasised self-determination, autonomy and dignity when nearing end-of-life.                      | ESKD                             | HIC                             | ++       |

## REFERENCES

1. Ene-lordache B, Perico N, Bikbov B, et al. Chronic kidney disease and cardiovascular risk in six regions of the world (ISN-KDDC): a cross-sectional study. *Lancet Glob Health* 2016;4(5):e307-19. doi: 10.1016/S2214-109X(16)00071-1 [published Online First: 2016/04/23]
2. Schlieper G, Hess K, Floege J, et al. The vulnerable patient with chronic kidney disease. *Nephrol Dial Transplant* 2016;31(3):382-90. doi: 10.1093/ndt/gfv041 [published Online First: 2015/03/07]
3. Go AS, Chertow GM, Fan D, et al. Chronic Kidney Disease and the Risks of Death, Cardiovascular Events, and Hospitalization. *N Engl J Med* 2016;351(13):1296-305.
4. Chillon JM, Massy ZA, Stengel B. Neurological complications in chronic kidney disease patients. *Nephrol Dial Transplant* 2016;31(10):1606-14. doi: 10.1093/ndt/gfv315 [published Online First: 2015/09/12]
5. Jhee JH, Lee E, Cha MU, et al. Prevalence of depression and suicidal ideation increases proportionally with renal function decline, beginning from early stages of chronic kidney disease. *Medicine (Baltimore)* 2017;96(44):e8476. doi: 10.1097/MD.00000000000008476 [published Online First: 2017/11/03]
6. Goh ZS, Griva K. Anxiety and depression in patients with end-stage renal disease: impact and management challenges - a narrative review. *Int J Nephrol Renovasc Dis* 2018;11:93-102. doi: 10.2147/IJNRD.S126615 [published Online First: 2018/03/22]
7. Levin A, Tonelli M, Bonventre J, et al. Global kidney health 2017 and beyond: a roadmap for closing gaps in care, research, and policy. *Lancet* 2017 doi: 10.1016/S0140-6736(17)30788-2 [published Online First: 2017/04/25]
8. Stanifer JW, Muir A, Jafar TH, et al. Chronic kidney disease in low- and middle-income countries. *Nephrol Dial Transplant* 2016;31(6):868-74. doi: 10.1093/ndt/gfv466 [published Online First: 2016/05/25]
9. Liyanage T, Ninomiya T, Jha V, et al. Worldwide access to treatment for end-stage kidney disease: a systematic review. *Lancet* 2015;385(9981):1975-82. doi: 10.1016/S0140-6736(14)61601-9 [published Online First: 2015/03/18]
10. Fraser SD, Roderick PJ, May CR, et al. The burden of comorbidity in people with chronic kidney disease stage 3: a cohort study. *BMC Nephrol* 2015;16:193. doi: 10.1186/s12882-015-0189-z [published Online First: 2015/12/02]
11. Fraser SD, Taal MW. Multimorbidity in people with chronic kidney disease: implications for outcomes and treatment. *Curr Opin Nephrol Hypertens* 2016;25(6):465-72. doi: 10.1097/MNH.0000000000000270 [published Online First: 2016/10/18]
12. Holman HR. Chronic illness and the healthcare crisis. *Chronic Illness* 2006;1(4):265-74.
13. May C, Eton D, Boehmer K, et al. Rethinking the patient: using Burden of Treatment Theory to understand the changing dynamics of illness. *BMC Health Serv Res* 2014;14:281. doi: 10.1186/1472-6963-14-281 [published Online First: 2014/06/28]
14. May C. Chronic illness and intractability: professional-patient interactions in primary care. *Chronic Illness* 2005;1(1):15-20.
15. Karamanidou C, Weinman J, Horne R. A qualitative study of treatment burden among haemodialysis recipients. *J Health Psychol* 2014;19(4):556-69. doi: 10.1177/1359105313475898 [published Online First: 2013/03/09]
16. Eton DT, Elraiyah TA, Yost KJ, et al. A systematic review of patient-reported measures of burden of treatment in three chronic diseases. *Patient Relat Outcome Meas* 2013;4:7-20. doi: 10.2147/PROM.S44694 [published Online First: 2013/07/09]

17. Bohlen K, Scoville E, Shippee ND, et al. Overwhelmed patients: a videographic analysis of how patients with type 2 diabetes and clinicians articulate and address treatment burden during clinical encounters. *Diabetes Care* 2012;35(1):47-9. doi: 10.2337/dc11-1082 [published Online First: 2011/11/22]
18. Gallacher K, Jani B, Morrison D, et al. Qualitative systematic reviews of treatment burden in stroke, heart failure and diabetes - methodological challenges and solutions. *BMC Med Res Methodol* 2013;13:10. doi: 10.1186/1471-2288-13-10 [published Online First: 2013/01/30]
19. Gallacher K, May C, Montori V, et al. Understanding patients' experiences of treatment burden in chronic heart failure using normalization process theory. *Ann Fam Med* 2011;9(3):235-43. doi: 10.1370/afm.1249 [published Online First: 2011/05/11]
20. Gallacher K, Morrison D, Jani B, et al. Uncovering treatment burden as a key concept for stroke care: a systematic review of qualitative research. *PLoS Med* 2013;10(6):e1001473. doi: 10.1371/journal.pmed.1001473 [published Online First: 2013/07/05]
21. Ridgeway JL, Egginton JS, Tiedje K, et al. Factors that lessen the burden of treatment in complex patients with chronic conditions: a qualitative study. *Patient Prefer Adherence* 2014;8:339-51. doi: 10.2147/PPA.S58014 [published Online First: 2014/03/29]
22. Shippee ND, Shah ND, May CR, et al. Cumulative complexity: a functional, patient-centered model of patient complexity can improve research and practice. *J Clin Epidemiol* 2012;65(10):1041-51. doi: 10.1016/j.jclinepi.2012.05.005 [published Online First: 2012/08/23]
23. Sav A, Kendall E, McMillan SS, et al. 'You say treatment, I say hard work': treatment burden among people with chronic illness and their carers in Australia. *Health Soc Care Community* 2013;21(6):665-74. doi: 10.1111/hsc.12052 [published Online First: 2013/05/25]
24. Sav A, King MA, Whitty JA, et al. Burden of treatment for chronic illness: a concept analysis and review of the literature. *Health Expect* 2015;18(3):312-24. doi: 10.1111/hex.12046 [published Online First: 2013/02/01]
25. Eton DT, Ramalho de Oliveira D, Egginton JS, et al. Building a measurement framework of burden of treatment in complex patients with chronic conditions: a qualitative study. *Patient Relat Outcome Meas* 2012;3:39-49. doi: 10.2147/PROM.S34681 [published Online First: 2012/11/28]
26. Eton DT, Ridgeway JL, Egginton JS, et al. Finalizing a measurement framework for the burden of treatment in complex patients with chronic conditions. *Patient Relat Outcome Meas* 2015;6:117-26. doi: 10.2147/PROM.S78955 [published Online First: 2015/04/08]
27. Tran V, Barnes C, Montori V, et al. Taxonomy of the burden of treatment: a multi-country web-based qualitative study of patients with chronic conditions. *BMC Med* 2015;13:115. doi: 10.1186/s12916-015-0356-x [published Online First: 2015/05/15]
28. Boehmer KR, Gionfriddo MR, Rodriguez-Gutierrez R, et al. Patient capacity and constraints in the experience of chronic disease: a qualitative systematic review and thematic synthesis. *BMC Fam Pract* 2016;17:127. doi: 10.1186/s12875-016-0525-9 [published Online First: 2016/09/03]
29. Hunt KJ, May CR. Managing expectations: cognitive authority and experienced control in complex healthcare processes. *BMC Health Serv Res* 2017;17(1):459. doi: 10.1186/s12913-017-2366-1 [published Online First: 2017/07/07]
30. May C, Cummings A, Myall M, et al. Experiences of long-term life-limiting conditions among patients and carers: what can we learn from a meta-review of systematic reviews of qualitative studies of chronic heart failure, chronic obstructive pulmonary

- disease and chronic kidney disease? *BMJ Open* 2016;6(10):e011694. doi: 10.1136/bmjopen-2016-011694 [published Online First: 2016/10/07]
31. May C, Masters J, Welch L, et al. EXPERTS 1-experiences of long-term life-limiting conditions among patients and carers: protocol for a qualitative meta-synthesis and conceptual modelling study. *BMJ Open* 2015;5(4):e007372. doi: 10.1136/bmjopen-2014-007372 [published Online First: 2015/04/04]
32. Tong A, Flemming K, McInnes E, et al. Enhancing transparency in reporting the synthesis of qualitative research: ENTREQ. *BMC Med Res Methodol* 2012;12(181):181. doi: 10.1186/1471-2288-12-181 [published Online First: 2012/11/29]
33. Critical Appraisal Skills Program (CASP): CASP Checklists Oxford2014 [Available from: [www.casp-uk.net](http://www.casp-uk.net) accessed May-June 2017 2017.
34. May C, Finch T. Implementing, Embedding, and Integrating Practices: An Outline of Normalization Process Theory. *Sociology* 2009;43(3):535-54. doi: 10.1177/0038038509103208
35. Kahn LS, Vest BM, Madurai N, et al. Chronic kidney disease (CKD) treatment burden among low-income primary care patients. *Chronic Illn* 2015;11(3):171-83. doi: 10.1177/1742395314559751 [published Online First: 2014/11/25]
36. Demain S, Goncalves AC, Areia C, et al. Living with, managing and minimising treatment burden in long term conditions: a systematic review of qualitative research. *PLoS One* 2015;10(5):e0125457. doi: 10.1371/journal.pone.0125457 [published Online First: 2015/05/30]
37. Fráguas G, Soares SM, Silva PA. The Family in the Context of the Care to the Diabetic Nephropathy-holder: Demands and Resources. *Escola Anna Nery - Revista de Enfermagem* 2008;12(2):271-77.
38. Ashby M, op't Hoog C, Kellehear A, et al. Renal dialysis abatement: lessons from a social study. *Palliat Med* 2005;19(5):389-96. doi: 10.1191/0269216305pm1043oa [published Online First: 2005/08/23]
39. Bailey PK, Ben-Shlomo Y, Tomson CR, et al. Socioeconomic deprivation and barriers to live-donor kidney transplantation: a qualitative study of deceased-donor kidney transplant recipients. *BMJ Open* 2016;6(3):e010605. doi: 10.1136/bmjopen-2015-010605 [published Online First: 2016/03/05]
40. Chiaranai C. The Lived Experience of Patients Receiving Hemodialysis Treatment for End-Stage Renal Disease: A Qualitative Study. *J Nurs Res* 2016;24(2):101-8. doi: 10.1097/jnr.000000000000100 [published Online First: 2015/08/15]
41. Cho MK, Shin G. Gender-based experiences on the survival of chronic renal failure patients under hemodialysis for more than 20 years. *Appl Nurs Res* 2016;32:262-68. doi: 10.1016/j.apnr.2016.08.008 [published Online First: 2016/12/15]
42. Dekkers W, Uerz I, Wils JP. Living well with end stage renal disease: patients' narratives interrupted from a virtue perspective. *Ethical theory and moral practice : an international forum* 2005;8(5):485-506. [published Online First: 2006/03/17]
43. Ekelund ML, Andersson SI. "I need to lead my own life in any case"--a study of patients in dialysis with or without a partner. *Patient Educ Couns* 2010;81(1):30-6. doi: 10.1016/j.pec.2009.10.025 [published Online First: 2009/12/08]
44. Kazley AS, Johnson E, Simpson K, et al. African American patient knowledge of kidney disease: A qualitative study of those with advanced chronic kidney disease. *Chronic Illn* 2015;11(4):245-55. doi: 10.1177/1742395314556658 [published Online First: 2014/10/23]
45. Lee VY, Seah WY, Kang AW, et al. Managing multiple chronic conditions in Singapore - Exploring the perspectives and experiences of family caregivers of patients with diabetes and end stage renal disease on haemodialysis. *Psychol Health*

- 2016;31(10):1220-36. doi: 10.1080/08870446.2016.1203921 [published Online First: 2016/06/30]
46. Lindberg M, Lindberg P. Overcoming obstacles for adherence to phosphate binding medication in dialysis patients: a qualitative study. *Pharm World Sci* 2008;30(5):571-6. doi: 10.1007/s11096-008-9212-9 [published Online First: 2008/03/28]
47. Mercado-Martínez FJ, Correa-Mauricio ME. Living in hemodialysis without social insurance: The voices of renal sick people and their families. *Salud Publica Mex* 2015;57(2):155-60.
48. Mercado-Martinez FJ, Silva DGVd, Souza SdSd, et al. Vivendo com insuficiência renal: obstáculos na terapia da hemodiálise na perspectiva das pessoas doentes e suas famílias. *Physis: Revista de Saúde Coletiva* 2015;25(1):59-74. doi: 10.1590/s0103-73312015000100005
49. Mercado-Martínez FJ, Hernández-Ibarra E, Ascencio-Mera CD, et al. Viviendo con trasplante renal, sin protección social en salud: ¿Qué dicen los enfermos sobre las dificultades económicas que enfrentan y sus efectos? *Cad Saude Publica* 2014;30(10):2092-100. doi: 10.1590/0102-311x00150713
50. Seah AS, Tan F, Srinivas S, et al. Opting out of dialysis - Exploring patients' decisions to forego dialysis in favour of conservative non-dialytic management for end-stage renal disease. *Health Expect* 2015;18(5):1018-29. doi: 10.1111/hex.12075 [published Online First: 2013/05/08]
51. Walker RC, Howard K, Tong A, et al. The economic considerations of patients and caregivers in choice of dialysis modality. *Hemodial Int* 2016;20(4):634-42. doi: 10.1111/hdi.12424 [published Online First: 2016/05/20]
52. Cervantes L, Fischer S, Berlinger N, et al. The Illness Experience of Undocumented Immigrants With End-stage Renal Disease. *JAMA Intern Med* 2017;177(4):529-35. doi: 10.1001/jamainternmed.2016.8865 [published Online First: 2017/02/07]
53. Anderson K, Cunningham J, Devitt J, et al. "Looking back to my family": indigenous Australian patients' experience of hemodialysis. *BMC Nephrol* 2012;13(114):114. doi: 10.1186/1471-2369-13-114 [published Online First: 2012/09/21]
54. Polaschek N. Living on dialysis: concerns of clients in a renal setting. *J Adv Nurs* 2003;41(1):44-52. [published Online First: 2003/01/10]
55. Polaschek N. Managing home dialysis: the client perspective on independent treatment. *Renal Society of Australasia Journal* 2006;2(3):53-63.
56. Polaschek N. 'Doing dialysis at home': client attitudes towards renal therapy. *J Clin Nurs* 2007;16(3A):51-8. doi: 10.1111/j.1365-2702.2006.01622.x [published Online First: 2007/05/24]
57. Rix EF, Barclay L, Stirling J, et al. The perspectives of Aboriginal patients and their health care providers on improving the quality of hemodialysis services: a qualitative study. *Hemodial Int* 2015;19(1):80-9. doi: 10.1111/hdi.12201 [published Online First: 2014/07/25]
58. Rix EF, Barclay L, Stirling J, et al. 'Beats the alternative but it messes up your life': aboriginal people's experience of haemodialysis in rural Australia. *BMJ Open* 2014;4(9):e005945. doi: 10.1136/bmjopen-2014-005945 [published Online First: 2014/09/19]
59. Shih LCH, M. The impact of dialysis on rurally based Maori and their whanau/families. *Nurs Prax N Z* 2011;27(2):5-15.
60. Valsaraj BP, Bhat SM, Prabhu R, et al. A qualitative research on the experience of haemodialysis in South Karnataka: lived experience of persons undergoing haemodialysis. *Journal of Krishna Institute of Medical Sciences University* 2014;3(2):90-100.



61. Walker RC, Howard K, Morton RL, et al. Patient and caregiver values, beliefs and experiences when considering home dialysis as a treatment option: a semi-structured interview study. *Nephrol Dial Transplant* 2016;31(1):133-41. doi: 10.1093/ndt/gfv330 [published Online First: 2015/09/09]
62. Wells SA. Determinants of Adherence to Living on Dialysis for Mexican Americans. *SAGE Open* 2015;5(1):1-12. doi: 10.1177/2158244015574961
63. Tong A, Sainsbury P, Chadban S, et al. Patients' experiences and perspectives of living with CKD. *Am J Kidney Dis* 2009;53(4):689-700. doi: 10.1053/j.ajkd.2008.10.050 [published Online First: 2009/02/14]
64. Allen D, Badro V, Denyer-Willis L, et al. Fragmented care and whole-person illness: Decision-making for people with chronic end-stage kidney disease. *Chronic Illn* 2015;11(1):44-55. doi: 10.1177/1742395314562974 [published Online First: 2014/12/06]
65. Oyegbile YO, Brysiewicz P. Family caregiver's experiences of providing care to patients with End-Stage Renal Disease in South-West Nigeria. *J Clin Nurs* 2017;26(17-18):2624-32. doi: 10.1111/jocn.13689 [published Online First: 2016/12/17]
66. Wu CC, Lin CC, Hsieh HF, et al. Lived experiences and illness representation of Taiwanese patients with late-stage chronic kidney disease. *J Health Psychol* 2016;21(12):2788-98. doi: 10.1177/1359105315587134 [published Online First: 2015/06/11]
67. Nobahar M. Exploring experiences of the quality of nursing care among patients, nurses, caregivers and physicians in a haemodialysis department. *Journal of Renal Care* 2016;xx(xx):1-10.
68. Nobahar M, Tamadon MR. Barriers to and facilitators of care for hemodialysis patients; a qualitative study. *J Renal Inj Prev* 2016;5(1):39-44. doi: 10.15171/jrip.2016.09 [published Online First: 2016/04/14]
69. Blogg AH, Hyde C. The experience of spouses caring for a person on home haemodialysis: an ethnography. *Renal Society of Australasia Journal* 2008;4(3):75-80.
70. Hanson CS, Chapman JR, Craig JC, et al. Patient experiences of training and transition to home haemodialysis: A mixed-methods study. *Nephrology* 2017;22(8):631-41. doi: 10.1111/nep.12827 [published Online First: 2016/06/03]
71. Rygh E, Arild E, Johnsen E, et al. Choosing to live with home dialysis-patients' experiences and potential for telemedicine support: a qualitative study. *BMC Nephrol* 2012;13(13):13. doi: 10.1186/1471-2369-13-13 [published Online First: 2012/03/21]
72. Sadala MLcAj, Bruzos GAdS, Pereira ER, et al. Patients' experiences of peritoneal dialysis at home: a phenomenological approach. *Rev Latino-am Enfermagem* 2012;20(1):68-75.
73. Keeping LM, English LM. Informal and incidental learning with patients who use continuous ambulatory peritoneal dialysis. *Nephrol Nurs J* 2001;28(3):313-23.
74. Wilkinson E, Randhawa G, Brown E, et al. Exploring access to end of life care for ethnic minorities with end stage kidney disease through recruitment in action research. *BMC Palliat Care* 2016;15(57):57. doi: 10.1186/s12904-016-0128-1 [published Online First: 2016/07/13]
75. Wilkinson E, Randhawa G, Farrington K, et al. Lack of awareness of kidney complications despite familiarity with diabetes: a multi-ethnic qualitative study. *Journal of renal care* 2011;37(1):2-11. doi: 10.1111/j.1755-6686.2011.00199.x [published Online First: 2011/02/04]
76. Tijerina MS. Psychosocial factors influencing Mexican-American women's adherence with hemodialysis treatment. *Soc Work Health Care* 2006;43(1):57-74. doi: 10.1300/J010v43n01\_04 [published Online First: 2006/05/26]

- 1  
2  
3 77. Anderson K, Devitt J, Cunningham J, et al. "All they said was my kidneys were dead":  
4 Indigenous Australian patients' understanding of their chronic kidney disease. *Med J*  
5 *Aust* 2008;189(9):499-503.
- 6 78. Burnette L, Kickett M. 'You are just a puppet': Australian Aboriginal people's experience  
7 of disempowerment when undergoing treatment for end-stage renal disease. *Renal*  
8 *Society of Australasia Journal* 2009;5(3):113-18.
- 9 79. Morton RL, Devitt J, Howard K, et al. Patient views about treatment of stage 5 CKD: a  
10 qualitative analysis of semistructured interviews. *Am J Kidney Dis* 2010;55(3):431-40.  
11 doi: 10.1053/j.ajkd.2009.11.011 [published Online First: 2010/02/02]
- 12 80. Walker RC, Walker S, Morton RL, et al. Maori patients' experiences and perspectives of  
13 chronic kidney disease: a New Zealand qualitative interview study. *BMJ Open*  
14 2017;7(1):e013829. doi: 10.1136/bmjopen-2016-013829 [published Online First:  
15 2017/01/21]
- 16 81. Stewart M. Qualitative inquiry: perceptions of sexuality by African Americans  
17 experiencing haemodialysis. *J Adv Nurs* 2013;69(8):1704-13. doi: 10.1111/jan.12028  
18 [published Online First: 2012/10/11]
- 19 82. Salvalaggio GK, L.: Minore, B. Perspectives on health: experiences of First Nations dialysis  
20 patients relocated from remote communities for treatment. *Canadian Journal of*  
21 *Rural Medicine* 2003;8(1):19-24.
- 22 83. Crowley-Matoka M. Desperately seeking "normal": the promise and perils of living with  
23 kidney transplantation. *Soc Sci Med* 2005;61(4):821-31. doi:  
24 10.1016/j.socscimed.2004.08.043 [published Online First: 2005/06/14]
- 25 84. Gordon EJ, Prohaska TR, Gallant M, et al. Self-care strategies and barriers among kidney  
26 transplant recipients: a qualitative study. *Chronic Illn* 2009;5(2):75-91. doi:  
27 10.1177/1742395309103558 [published Online First: 2009/05/29]
- 28 85. Schmid-Mohler G, Schafer-Keller P, Frei A, et al. A mixed-method study to explore  
29 patients' perspective of self-management tasks in the early phase after kidney  
30 transplant. *Prog Transplant* 2014;24(1):8-18. doi: 10.7182/pit2014728 [published  
31 Online First: 2014/03/07]
- 32 86. Chenitz KB, Fernando M, Shea JA. In-center hemodialysis attendance: patient  
33 perceptions of risks, barriers, and recommendations. *Hemodial Int* 2014;18(2):364-  
34 73. doi: 10.1111/hdi.12139 [published Online First: 2014/01/23]
- 35 87. Campos CJ, Turato ER. Hemodialysis treatment as perceived by the renal patient:  
36 clinical qualitative study. *Rev Bras Enferm* 2010;63(5):799-805.
- 37 88. Campos CG, Mantovani MeF, Nascimento ME, et al. Social representations of illness  
38 among people with chronic kidney disease. *Revista gaúcha de enfermagem /*  
39 *EENFUFGRS* 2015;36(2):106-12. doi: 10.1590/1983-1447.2015.02.48183
- 40 89. de Brito DC, de Paula AM, Grincenkov FR, et al. Analysis of the changes and difficulties  
41 arising from kidney transplantation: a qualitative study. *Rev Lat Am Enfermagem*  
42 2015;23(3):419-26. doi: 10.1590/0104-1169.0106.2571 [published Online First:  
43 2015/08/28]
- 44 90. Finnegan-John J, Thomas VJ. The psychosocial experience of patients with end-stage  
45 renal disease and its impact on quality of life: findings from a needs assessment to  
46 shape a service. *ISRN nephrology* 2013;2013:308986. doi: 10.5402/2013/308986  
47 [published Online First: 2013/01/01]
- 48 91. King N, Carroll C, Newton P, et al. "You can't cure it so you have to endure it": the  
49 experience of adaptation to diabetic renal disease. *Qual Health Res* 2002;12(3):329-  
50 46. doi: 10.1177/104973202129119928 [published Online First: 2002/03/29]
- 51 92. Costantini L, Beanlands H, McCay E, et al. The self-management experience of people  
52 with mild to moderate chronic kidney disease. *Nephrol Nurs J* 2008;35(2):147-55;  
53 quiz 56. [published Online First: 2008/05/14]
- 54  
55  
56  
57  
58  
59  
60



93. Lopez-Vargas PA, Tong A, Howell M, et al. Patient awareness and beliefs about the risk factors and comorbidities associated with chronic kidney disease : A mixed-methods study. *Nephrology* 2017;22(5):374-81. doi: 10.1111/nep.12829 [published Online First: 2016/06/02]
94. Lopez-Vargas PA, Tong A, Phoon RK, et al. Knowledge deficit of patients with stage 1-4 CKD: a focus group study. *Nephrology* 2014;19(4):234-43. doi: 10.1111/nep.12206 [published Online First: 2014/01/17]
95. Mason J, Stone M, Khunti K, et al. Educational needs for blood pressure control in chronic kidney disease. *Journal of renal care* 2007;33(3):134-8. [published Online First: 2007/07/01]
96. Muduma G, Shupo FC, Dam S, et al. Patient survey to identify reasons for non-adherence and elicitation of quality of life concepts associated with immunosuppressant therapy in kidney transplant recipients. *Patient Prefer Adherence* 2016;10:27-36. doi: 10.2147/PPA.S96086 [published Online First: 2016/02/03]
97. Noble H, Kelly D, Hudson P. Experiences of carers supporting dying renal patients managed without dialysis. *J Adv Nurs* 2013;69(8):1829-39. doi: 10.1111/jan.12049 [published Online First: 2012/11/22]
98. Noble H, Meyer J, Bridges J, et al. Examining renal patients' death trajectories without dialysis. *End of Life Care* 2010;4(2):26-34.
99. Rifkin DE, Laws MB, Rao M, et al. Medication adherence behavior and priorities among older adults with CKD: a semistructured interview study. *Am J Kidney Dis* 2010;56(3):439-46. doi: 10.1053/j.ajkd.2010.04.021 [published Online First: 2010/08/03]
100. Velez E, Ramasco M. Meaning of illness and illness representations, crucial factors to integral care. *EDTNA/ERCA journal* 2006;32(2):81-5. [published Online First: 2006/08/11]
101. Williams AF, Manias E. Perceptions of pain control by consumers with chronic kidney disease. *J Nurs Healthc Chronic Illn* 2009;1(3):199-209. doi: 10.1111/j.1752-9824.2009.01022.x
102. Williams AF, Manias E, Walker R. Adherence to multiple, prescribed medications in diabetic kidney disease: A qualitative study of consumers' and health professionals' perspectives. *Int J Nurs Stud* 2008;45(12):1742-56. doi: 10.1016/j.ijnurstu.2008.07.002 [published Online First: 2008/08/15]
103. Silva RARd, Souza VLd, Oliveira GJNd, et al. Coping strategies used by chronic renal failure patients on hemodialysis. *Escola Anna Nery - Revista de Enfermagem* 2016;20(1):147-54. doi: 10.5935/1414-8145.20160020
104. Al-Arabi S. Quality of life: subjective descriptions of challenges to patients with end stage renal disease. *Nephrol Nurs J* 2006;33(3):285-92. [published Online First: 2006/07/25]
105. Bourbonnais FF, Tousignant KF. The pain experience of patients on maintenance hemodialysis. *Nephrol Nurs J* 2012;39(1):13-9; quiz 20. [published Online First: 2012/04/07]
106. Clarkson KA, Robinson K. Life on dialysis: a lived experience. *Nephrol Nurs J* 2010;37(1):29-35. [published Online First: 2010/03/26]
107. Aasen EM, Kvangarsnes M, Heggen K. Perceptions of patient participation amongst elderly patients with end-stage renal disease in a dialysis unit. *Scand J Caring Sci* 2012;26(1):61-9. doi: 10.1111/j.1471-6712.2011.00904.x [published Online First: 2011/07/02]
108. Richard CJ, Engebretson J. Negotiating living with an arteriovenous fistula for hemodialysis. *Nephrol Nurs J* 2010;37(4):363-74; quiz 75. [published Online First: 2010/09/14]

- 1  
2  
3 109. Tweed AE, Ceaser K. Renal replacement therapy choices for pre-dialysis renal patients.  
4 *Br J Nurs* 2005;14(12):659-64. doi: 10.12968/bjon.2005.14.12.18287 [published  
5 Online First: 2005/07/13]
- 6 110. Xi W, Harwood L, Diamant MJ, et al. Patient attitudes towards the arteriovenous fistula:  
7 a qualitative study on vascular access decision making. *Nephrol Dial Transplant*  
8 2011;26(10):3302-8. doi: 10.1093/ndt/gfr055 [published Online First: 2011/03/17]
- 9 111. Taylor MJ, Hanson CS, Casey JR, et al. "You know your own fistula, it becomes a part of  
10 you"--Patient perspectives on vascular access: A semistructured interview study.  
11 *Hemodial Int* 2016;20(1):5-14. doi: 10.1111/hdi.12340 [published Online First:  
12 2015/07/24]
- 13 112. Yu J, Ng HJ, Nandakumar M, et al. The management of food cravings and thirst in  
14 hemodialysis patients: A qualitative study. *J Health Psychol* 2016;21(2):217-27. doi:  
15 10.1177/1359105314525066 [published Online First: 2014/03/25]
- 16 113. Cristóvão AF. Dificultades y estrategias en el manejo del régimen terapéutico en el  
17 paciente renal crónico en hemodiálisis. *Enferm Nefrol* 2013;16(4):247-55.
- 18 114. Gricio TC, Kusumotal L, Cândido MldL. Perceptions and knowledge of patients with  
19 Chronic Kidney Disease under conservative treatment. *Rev Eletr Enf* 2009;11(4):884-  
20 93.
- 21 115. Hagren B, Pettersen IM, Severinsson E, et al. Maintenance haemodialysis: patients'  
22 experiences of their life situation. *J Clin Nurs* 2005;14(3):294-300. doi:  
23 10.1111/j.1365-2702.2004.01036.x [published Online First: 2005/02/15]
- 24 116. Herbias LH, Soto RA, Figueroa HB, et al. Meaning of quality of life in patients on  
25 hemodialysis therapy: A phenomenological study. *Revista de la Sociedad Espanola*  
26 *de Enfermeria Nefrologica* 2016;19(1):37-44.
- 27 117. Tovazzi ME, Mazzoni V. Personal paths of fluid restriction in patients on hemodialysis.  
28 *Nephrol Nurs J* 2012;39(3):207-15. [published Online First: 2012/08/08]
- 29 118. Avril-Sephula B, Meekums B, Jackson C. How do partners living with haemodialysis  
30 patients cope? *Journal of Renal Nursing* 2014;6(3):133-37.
- 31 119. Roso CC, Beuter M, Kruse MHL, et al. Self-care of patients in conservative treatment of  
32 chronic renal insufficiency. *Text Context Nursing* 2013;22(3):739-45.
- 33 120. Hong LI, Wang W, Chan EY, et al. Dietary and fluid restriction perceptions of patients  
34 undergoing haemodialysis: an exploratory study. *J Clin Nurs* 2017:1-13. doi:  
35 10.1111/jocn.13739 [published Online First: 2017/01/26]
- 36 121. de Brito-Ashurst I, Perry L, Sanders TA, et al. Barriers and facilitators of dietary sodium  
37 restriction amongst Bangladeshi chronic kidney disease patients. *J Hum Nutr Diet*  
38 2011;24(1):86-95. doi: 10.1111/j.1365-277X.2010.01129.x [published Online First:  
39 2010/12/01]
- 40 122. Theofilou P, Synodinou C, Panagiotaki H. Undergoing haemodialysis-A qualitative study  
41 to investigate the lived experiences of patients. *Europe's Journal of Psychology*  
42 2013;9(1):19-32.
- 43 123. Shirazian S, Crnosija N, Weinger K, et al. The self-management experience of patients  
44 with type 2 diabetes and chronic kidney disease: A qualitative study. *Chronic Illn*  
45 2016;12(1):18-28. doi: 10.1177/1742395315614381 [published Online First:  
46 2015/11/06]
- 47 124. Walker R, James H, Burns A. Adhering to behaviour change in older pre-dialysis  
48 populations--what do patients think? A qualitative study. *Journal of renal care*  
49 2012;38(1):34-42. doi: 10.1111/j.1755-6686.2012.00262.x [published Online First:  
50 2012/03/01]
- 51 125. Kierans C, Padilla-Altamira C, Garcia-Garcia G, et al. When health systems are barriers  
52 to health care: challenges faced by uninsured Mexican kidney patients. *PLoS One*  
53  
54  
55  
56  
57  
58  
59  
60

- 2013;8(1):e54380. doi: 10.1371/journal.pone.0054380 [published Online First: 2013/01/26]
126. Bristowe K, Horsley HL, Shepherd K, et al. Thinking ahead--the need for early Advance Care Planning for people on haemodialysis: A qualitative interview study. *Palliat Med* 2015;29(5):443-50. doi: 10.1177/0269216314560209 [published Online First: 2014/12/21]
127. Tonkin-Crine S, Okamoto I, Leydon GM, et al. Understanding by older patients of dialysis and conservative management for chronic kidney failure. *Am J Kidney Dis* 2015;65(3):443-50. doi: 10.1053/j.ajkd.2014.08.011 [published Online First: 2014/10/12]
128. Johnston S, Noble H. Factors influencing patients with stage 5 chronic kidney disease to opt for conservative management: a practitioner research study. *J Clin Nurs* 2012;21(9-10):1215-22. doi: 10.1111/j.1365-2702.2011.04001.x [published Online First: 2012/03/06]
129. Lo C, Ilic D, Teede H, et al. The Perspectives of Patients on Health-Care for Co-Morbid Diabetes and Chronic Kidney Disease: A Qualitative Study. *PLoS One* 2016;11(1):e0146615. doi: 10.1371/journal.pone.0146615 [published Online First: 2016/01/06]
130. Prieto MA, Escudero MJ, Suess A, et al. Patients' opinions and expectations about the dialysis care process. *An Sist Sanit Navar* 2011;34(1):21-31.
131. Reta laS, Larrea AA, Uriarte OGa, et al. Withdrawing dialysis in End-Stage Renal Disease: What do patients think? *Enferm Nefrol* 2014;17(2):110-19.
132. Yngman-Uhlin P, Fogelberg A, Uhlin F. Life in standby: hemodialysis patients' experiences of waiting for kidney transplantation. *J Clin Nurs* 2016;25(1-2):92-8. doi: 10.1111/jocn.12994 [published Online First: 2015/10/08]
133. Moran A, Scott A, Darbyshire P. Waiting for a kidney transplant: patients' experiences of haemodialysis therapy. *J Adv Nurs* 2011;67(3):501-9. doi: 10.1111/j.1365-2648.2010.05460.x [published Online First: 2010/10/20]
134. Axelsson L, Klang B, Lundh Hagelin C, et al. End of life of patients treated with haemodialysis as narrated by their close relatives. *Scand J Caring Sci* 2015;29(4):776-84. doi: 10.1111/scs.12209 [published Online First: 2015/03/11]
135. Yngman-Uhlin P, Friedrichsen M, Gustavsson M, et al. Circling around in tiredness: perspectives of patients on peritoneal dialysis. *Nephrol Nurs J* 2010;37(4):407-13. [published Online First: 2010/09/14]
136. Axelsson L, Randers I, Jacobson SH, et al. Living with haemodialysis when nearing end of life. *Scand J Caring Sci* 2012;26(1):45-52. doi: 10.1111/j.1471-6712.2011.00902.x [published Online First: 2011/05/25]
137. Heiwe S, Clyne N, Dahlgren MA. Living with chronic renal failure: patients' experiences of their physical and functional capacity. *Physiother Res Int* 2003;8(4):167-77.
138. Horigan AE, Schneider SM, Docherty S, et al. The experience and self-management of fatigue in patients on hemodialysis. *Nephrol Nurs J* 2013;40(2):113-22; quiz 23. [published Online First: 2013/06/19]
139. White NR, J.: Koeckeritz, J.: Munch, K.: Walter, P. Going forward: family resiliency in patients on hemodialysis. *J Fam Nurs* 2004;10(3):357-78.
140. Heiwe S, Dahlgren MA. Living with chronic renal failure: Coping with physical activities of daily living. *Adv Physiother* 2009;6(4):147-57. doi: 10.1080/14038190410019540
141. Rabiei L, Eslami AA, Abedi H, et al. Caring in an atmosphere of uncertainty: perspectives and experiences of caregivers of peoples undergoing haemodialysis in Iran. *Scand J Caring Sci* 2016;30(3):594-601. doi: 10.1111/scs.12283 [published Online First: 2015/11/20]

- 1  
2  
3 142. Shahgholian N, Yousefi H. Supporting hemodialysis patients: A phenomenological study.  
4 *Iran J Nurs Midwifery Res* 2015;20(5):626-33. doi: 10.4103/1735-9066.164514  
5 [published Online First: 2015/10/13]
- 6 143. Yeun EJ, Bang HY, Kim EJ, et al. Attitudes toward stress and coping among primary  
7 caregivers of patients undergoing hemodialysis: A Q-methodology study. *Hemodial*  
8 *Int* 2016;20(3):453-62. doi: 10.1111/hdi.12404 [published Online First: 2016/02/03]
- 9 144. Yumang MJ, Hammond L, Filteau N, et al. Perceptions of risk for foot problems and foot  
10 care practices of patients on hemodialysis. *Nephrol Nurs J* 2009;36(5):509-16.  
11 [published Online First: 2009/10/28]
- 12 145. Barbosa GdS, Valadares GV. Hemodialysis: patient's adaptation and life style. *Acta Paul*  
13 *Enferm* 2009;22(Especial Nefrologia):524-27.
- 14 146. Calvey D, Mee L. The lived experience of the person dependent on haemodialysis.  
15 *Journal of renal care* 2011;37(4):201-7. doi: 10.1111/j.1755-6686.2011.00235.x  
16 [published Online First: 2011/11/01]
- 17 147. Krespi R, Bone M, Ahmad R, et al. Haemodialysis patients' beliefs about renal failure  
18 and its treatment. *Patient Educ Couns* 2004;53(2):189-96. doi: 10.1016/s0738-  
19 3991(03)00147-2
- 20 148. Cox KJ, Parshall MB, Hernandez SHA, et al. Symptoms among patients receiving in-  
21 center hemodialysis: A qualitative study. *Hemodialysis International* 2016;00(00):00-  
22 00.
- 23 149. Machado LRC, Car MR. A dialectic of patients' daily life with chronic renal failure in  
24 hemodialysis: the unavoidable and the casual. *Rev Esc Enferm USP* 2003;37(3):27-35.
- 25 150. Moran A, Scott PA, Darbyshire P. Existential boredom: the experience of living on  
26 haemodialysis therapy. *Med Humanit* 2009;35(2):70-5. doi:  
27 10.1136/jmh.2009.001511 [published Online First: 2009/12/01]
- 28 151. Krespi Boothby MR, Salmon P. [Self-efficacy and hemodialysis treatment: a qualitative  
29 and quantitative approach]. *Turk Psikiyatri Derg* 2013;24(2):84-93. [published Online  
30 First: 2013/06/12]
- 31 152. Tong A, Palmer S, Manns B, et al. The beliefs and expectations of patients and  
32 caregivers about home haemodialysis: an interview study. *BMJ Open*  
33 2013;3(1):e002148. doi: 10.1136/bmjopen-2012-002148 [published Online First:  
34 2013/01/29]
- 35 153. Torchi TS, Araujo STCd, Guimarães AM, A. G. M., et al. Clinical conditions and health  
36 care demand behavior of chronic renal patients. *Acta Paul Enferm* 2014;27(6):585-  
37 90. doi: 10.1590/1982-  
38 90. doi: 10.1590/1982-
- 39 154. Cadena DMaGn, Hoyos GPAb, Atilano BF, et al. Anchored to a machine: Experiences of  
40 patients with chronic kidney disease. *Revista CONAMED* 2015;20(S1):16-20.
- 41 155. Reis CKd, Guirardello EidB, Campos CJG. The person with renal chronic disease and  
42 caring demands. *Rev Bras Enferm* 2008;61(3):336-41.
- 43 156. Baillie J, Lankshear A. Patient and family perspectives on peritoneal dialysis at home:  
44 findings from an ethnographic study. *J Clin Nurs* 2015;24(1-2):222-34. doi:  
45 10.1111/jocn.12663 [published Online First: 2014/09/27]
- 46 157. Baillie J, Lankshear A. Patients' and relatives' experiences of peritonitis when using  
47 peritoneal dialysis. *Journal of Renal Care* 2015;41(3):177-86. doi: 10.1111/jorc.12118
- 48 158. Xi W, Singh PM, Harwood L, et al. Patient experiences and preferences on short daily  
49 and nocturnal home hemodialysis. *Hemodial Int* 2013;17(2):201-7. doi:  
50 10.1111/j.1542-4758.2012.00731.x [published Online First: 2012/08/14]
- 51 159. Giles S. Transformations: A Phenomenological Investigation into the Life-World of  
52 Home Haemodialysis. *Soc Work Health Care* 2004;38(2):29-50. doi:  
53 10.1300/J010v38n02\_02  
54  
55  
56  
57  
58  
59  
60

- 1  
2  
3 160. Giles S. Struggles between the body and machine: the paradox of living with a home  
4 haemodialysis machine. *Soc Work Health Care* 2005;41(2):19-35. doi:  
5 10.1300/J010v41n02\_02 [published Online First: 2005/07/29]  
6 161. Low J, Myers J, Smith G, et al. The experiences of close persons caring for people with  
7 chronic kidney disease stage 5 on conservative kidney management: contested  
8 discourses of ageing. *Health (London)* 2014;18(6):613-30. doi:  
9 10.1177/1363459314524805 [published Online First: 2014/04/04]  
10 162. Santos FKd, Valadares GV. Living between the nightmare and the awakening - the first  
11 time in dealing with peritoneal dialysis. *Escola Anna Nery - Revista de Enfermagem*  
12 2011;15(1):39-46.  
13 163. McCarthy A, Shaban R, Boys J, et al. Compliance, normality, and the patient on  
14 peritoneal dialysis. *Nephrol Nurs J* 2010;37(3):243-50; quiz 51. [published Online  
15 First: 2010/07/16]  
16 164. Chong HJ, Kim HK, Kim SR, et al. Waiting for a kidney transplant: the experience of  
17 patients with end-stage renal disease in South Korea. *J Clin Nurs* 2016;25(7-8):930-9.  
18 doi: 10.1111/jocn.13107 [published Online First: 2016/03/21]  
19 165. Flores RV, Thome EG. [Feelings of patients on the waiting list for a kidney transplant].  
20 *Rev Bras Enferm* 2004;57(6):687-90. [published Online First: 2005/07/29]  
21 166. Kierans C. Narrating kidney disease: the significance of sensation and time in the  
22 emplotment of patient experience. *Cult Med Psychiatry* 2005;29(3):341-59. doi:  
23 10.1007/s11013-005-9171-8 [published Online First: 2006/01/13]  
24 167. Kierans CM, Maynooth NUI. Sensory and narrative identity: The narration of illness  
25 process among chronic renal sufferers in Ireland. *Anthropol Med* 2001;8(2-3):237-  
26 53. doi: 10.1080/13648470120101381  
27 168. Knihns NdS, Sartori DL, Zink V, et al. The experience of patients who need renal  
28 transplantation while waiting for a compatible organ. *Text Context Nursing*  
29 2013;22(4):1160-68.  
30 169. Lawrence C, Sharma S, Da Silva-Gane M, et al. Exploring the views of patients not on the  
31 transplant waiting list: a qualitative study. *Journal of renal care* 2013;39(2):118-24.  
32 doi: 10.1111/j.1755-6686.2013.12012.x [published Online First: 2013/05/21]  
33 170. Lopes SGR, Silva DMGVd. Narratives of women on hemodialysis: waiting for a kidney  
34 transplant. *Texto & Contexto - Enfermagem* 2014;23(3):680-87. doi: 10.1590/0104-  
35 07072014002540013  
36 171. Spiers J, Smith JA. Waiting for a kidney from a deceased donor: an interpretative  
37 phenomenological analysis. *Psychol Health Med* 2016;21(7):836-44. doi:  
38 10.1080/13548506.2015.1112415 [published Online First: 2015/11/21]  
39 172. Wachterman MW, McCarthy EP, Marcantonio ER, et al. Mistrust, misperceptions, and  
40 miscommunication: a qualitative study of preferences about kidney transplantation  
41 among African Americans. *Transplant Proc* 2015;47(2):240-6. doi:  
42 10.1016/j.transproceed.2015.01.016 [published Online First: 2015/03/15]  
43 173. Allen D, Wainwright M, Hutchinson T. 'Non-compliance' as illness management:  
44 Hemodialysis patients' descriptions of adversarial patient-clinician interactions. *Soc*  
45 *Sci Med* 2011;73(1):129-34. doi: 10.1016/j.socscimed.2011.05.018 [published Online  
46 First: 2011/06/15]  
47 174. Sieverdes JC, Nemeth LS, Magwood GS, et al. African American kidney transplant  
48 patients' perspectives on challenges in the living donation process. *Prog Transplant*  
49 2015;25(2):164-75. doi: 10.7182/pit2015852 [published Online First: 2015/06/25]  
50 175. Boaz A, Morgan M. Working to establish 'normality' post-transplant: a qualitative study  
51 of kidney transplant patients. *Chronic Illn* 2014;10(4):247-58. doi:  
52 10.1177/1742395313504789 [published Online First: 2013/09/28]  
53  
54  
55  
56  
57  
58  
59  
60



- 1  
2  
3 176. Goldade K, Sidhwani S, Patel S, et al. Kidney transplant patients' perceptions, beliefs,  
4 and barriers related to regular nephrology outpatient visits. *Am J Kidney Dis*  
5 2011;57(1):11-20. doi: 10.1053/j.ajkd.2010.08.023 [published Online First:  
6 2010/11/23]
- 7 177. Spiers J, Smith JA, Drage M. A longitudinal interpretative phenomenological analysis of  
8 the process of kidney recipients' resolution of complex ambiguities within  
9 relationships with their living donors. *J Health Psychol* 2015 doi:  
10 10.1177/1359105315581070 [published Online First: 2015/05/02]
- 11 178. Stanfill A, Bloodworth R, Cashion A. Lessons learned: experiences of gaining weight by  
12 kidney transplant recipients. *Prog Transplant* 2012;22(1):71-8. [published Online  
13 First: 2012/04/12]
- 14 179. Tielen M, van Exel NJ, van Buren MC, et al. Attitudes towards medication non-  
15 adherence in elderly kidney transplant patients: a Q methodology study. *Nephrol*  
16 *Dial Transplant* 2011;26(5):1723-8. doi: 10.1093/ndt/gfq642 [published Online First:  
17 2010/10/14]
- 18 180. Gordon EJ, Prohaska TR, Gallant MP, et al. Adherence to immunosuppression: a  
19 prospective diary study. *Transplant Proc* 2007;39(10):3081-5. doi:  
20 10.1016/j.transproceed.2007.02.100 [published Online First: 2007/12/20]
- 21 181. Leung SS, Shiu AT. Experience of Hong Kong patients awaiting kidney transplantation in  
22 mainland China. *J Clin Nurs* 2007;16(11C):341-9. doi: 10.1111/j.1365-  
23 2702.2007.02070.x [published Online First: 2007/12/06]
- 24 182. Orr A, Orr D, Willis S, et al. Patient perceptions of factors influencing adherence to  
25 medication following kidney transplant. *Psychol Health Med* 2007;12(4):509-17. doi:  
26 10.1080/13548500701294556 [published Online First: 2007/07/11]
- 27 183. Orr A, Willis S, Holmes M, et al. Living with a kidney transplant: a qualitative  
28 investigation of quality of life. *J Health Psychol* 2007;12(4):653-62. doi:  
29 10.1177/1359105307078172 [published Online First: 2007/06/23]
- 30 184. Schipper K, Abma TA, Koops C, et al. Sweet and sour after renal transplantation: a  
31 qualitative study about the positive and negative consequences of renal  
32 transplantation. *Br J Health Psychol* 2014;19(3):580-91. doi: 10.1111/bjhp.12057  
33 [published Online First: 2013/07/06]
- 34 185. Wiederhold D, Langer G, Landenberger M. Ambivalent lived experiences and instruction  
35 need of patients in the early period after kidney transplantation: a  
36 phenomenological study. *Nephrol Nurs J* 2011;38(5):417-23; quiz 24. [published  
37 Online First: 2011/10/29]
- 38 186. Buldukoglu K, Kulakac O, Kecioglu N, et al. Recipients??? Perceptions of Their  
39 Transplanted Kidneys. *Transplantation* 2005;80(4):471-76. doi:  
40 10.1097/01.tp.0000168149.95310.6e
- 41 187. Axelsson L, Randers I, Lundh Hagelin C, et al. Thoughts on death and dying when living  
42 with haemodialysis approaching end of life. *J Clin Nurs* 2012;21(15-16):2149-59. doi:  
43 10.1111/j.1365-2702.2012.04156.x [published Online First: 2012/07/14]
- 44 188. Chatrung C, Sorajjakool S, Amnatsatsue K. Wellness and Religious Coping Among Thai  
45 Individuals Living with Chronic Kidney Disease in Southern California. *J Relig Health*  
46 2015;54(6):2198-211. doi: 10.1007/s10943-014-9958-4 [published Online First:  
47 2014/10/11]
- 48 189. Hain DJ, Wands L, Liehr P. Approaches to resolve health challenges in a population of  
49 older adults undergoing hemodialysis. *Res Gerontol Nurs* 2011;4(1):53-62. doi:  
50 10.3928/19404921-20100330-01 [published Online First: 2010/05/05]
- 51 190. Lin CC, Han CY, Pan IJ. A qualitative approach of psychosocial adaptation process in  
52 patients undergoing long-term hemodialysis. *Asian Nurs Res (Korean Soc Nurs Sci)*  
53  
54  
55  
56  
57  
58  
59  
60

- 2015;9(1):35-41. doi: 10.1016/j.anr.2014.10.007 [published Online First: 2015/04/02]
191. Rodrigues DFD, Schwartz E, Santana MdG, et al. Experience of men undergoing hemodialysis about their sexuality. *Avengerm* 2011;XXIX(2):255-62.
192. Tanyi RA, Werner JS. Women's experience of spirituality within end-stage renal disease and hemodialysis. *Clin Nurs Res* 2008;17(1):32-49. doi: 10.1177/1054773807311691 [published Online First: 2008/01/11]
193. Tanyi RA, Werner JS. Toward a trajectory of adjustment in women with end-stage renal disease on haemodialysis. *J Clin Nurs* 2008;17(5A):43-50. doi: 10.1111/j.1365-2702.2007.02199.x [published Online First: 2008/03/14]
194. Martin-McDonald K. Being dialysis-dependent: a qualitative perspective. *Collegian* 2003;10(2):29-33.
195. Martin-McDonald K. Dialysis-dependency: the reformulated or remnant person. *Contemp Nurse* 2003;16(1-2):151-60. [published Online First: 2004/03/05]
196. Niu H-y, Liu J-f. The psychological trajectory from diagnosis to approaching end of life in patients undergoing hemodialysis in China: A qualitative study. *International Journal of Nursing Sciences* 2017;4(1):29-33. doi: 10.1016/j.ijnss.2016.10.006
197. Bennett PN, Bonner A, Andrew J, et al. Using images to communicate the hidden struggles of life on dialysis. *Journal of Communication in Healthcare* 2013;6(1):12-21. doi: 10.1179/1753807613y.0000000031
198. Costa FG, Coutinho MdPdL, Santana IOd. Insuficiência renal crônica: representações sociais de pacientes com e sem depressão. *Psico-USF* 2014;19(3):387-98. doi: 10.1590/1413-82712014019003002
199. Yodchai K, Dunning T, Hutchinson AM, et al. How do Thai patients with end stage renal disease adapt to being dependent on haemodialysis? A pilot study. *Journal of renal care* 2011:216-23.
200. Arslan SY, Ege E. Sexual Experiences of Women Exposed to Hemodialysis Treatment. *Sex Disabil* 2009;27(4):215-21. doi: 10.1007/s11195-009-9132-1
201. Tanyi RA, Werner JS, Recine ACG, et al. Perceptions of incorporating spirituality into their care: A phenomenological study of female patients on hemodialysis. *Nephrol Nurs J* 2006;33(5):532-38.
202. Ladin K, Lin N, Hahn E, et al. Engagement in decision-making and patient satisfaction: a qualitative study of older patients' perceptions of dialysis initiation and modality decisions. *Nephrol Dial Transplant* 2016 doi: 10.1093/ndt/gfw307 [published Online First: 2016/09/01]
203. Erlang AS, Nielsen IH, Hansen HO, et al. Patients Experiences of Involvement in Choice of Dialysis Mode. *Journal of renal care* 2015;41(4):260-7. doi: 10.1111/jorc.12141 [published Online First: 2015/09/30]
204. Moran A, Scott AP, Darbyshire P. Communicating with nurses: patients' views on effective support while on haemodialysis. *Nurs Times* 2009;105(25):42146.
205. Mitchell A, Farrand P, James H, et al. Patients' experience of transition onto haemodialysis: a qualitative study. *Journal of renal care* 2009;35(2):99-107. doi: 10.1111/j.1755-6686.2009.00094.x [published Online First: 2009/05/13]
206. Schober GS, Wenger JB, Lee CC, et al. Dialysis Patient Perspectives on CKD Advocacy: A Semistructured Interview Study. *Am J Kidney Dis* 2017;69(1):29-40. doi: 10.1053/j.ajkd.2016.06.018 [published Online First: 2016/08/25]
207. Smith K, Coston M, Glock K, et al. Patient perspectives on fluid management in chronic hemodialysis. *J Ren Nutr* 2010;20(5):334-41. doi: 10.1053/j.jrn.2009.09.001 [published Online First: 2009/11/17]
208. Pietrovski V, Dall'Agnol CM. Situações significantes no espaço-contexto da hemodiálise: o que dizem os usuários de um serviço? *Rev Bras Enferm* 2006;59(5):630-35.

- 1  
2  
3 209. Malheiro Oliveira P, Arruda Soares D. Percepciones de las personas con insuficiencia  
4 renal crónica sobre la calidad de vida. *Enfermería Global* 2012;257-275(28)
- 5 210. Beanlands H, Horsburgh ME, Fox S, et al. Caregiving by family and friends of adults  
6 receiving dialysis. *Nephrol Nurs J* 2005;32(6):621-31. [published Online First:  
7 2006/01/24]
- 8 211. Ziegert K, Fridlund B, Lidell E. Health in everyday life among spouses of haemodialysis  
9 patients: a content analysis. *Scand J Caring Sci* 2006;20(2):223-8. doi:  
10 10.1111/j.1471-6712.2006.00400.x [published Online First: 2006/06/08]
- 11 212. Ziegert K, Fridlund B, Lidell E. "Time for dialysis as time to live": experiences of time in  
12 everyday life of the Swedish next of kin of hemodialysis patients. *Nurs Health Sci*  
13 2009;11(1):45-50. doi: 10.1111/j.1442-2018.2009.00429.x [published Online First:  
14 2009/03/21]
- 15 213. Zeiegert K, Fridlund B. Conceptions of life situation among next-of-kin of haemodialysis  
16 patients. *J Nurs Manag* 2001;9(4):231-39.
- 17 214. Eslami AA, Rabiei L, Abedi HA, et al. Coping skills of Iranian family careivers in caretaking  
18 of patients undergoing haemodialysis: a qualitative study. *Journal of renal care*  
19 2016;XX(X):1-10.
- 20 215. Taylor F, Gutteridge R, Willis C. Peer support for CKD patients and carers: overcoming  
21 barriers and facilitating access. *Health Expect* 2016;19(3):617-30. doi:  
22 10.1111/hex.12348 [published Online First: 2015/02/05]
- 23 216. Tavares JM, Lisboa MT, Ferreira MA, et al. Peritoneal dialysis: family care for chronic  
24 kidney disease patients in home-based treatment. *Rev Bras Enferm* 2016;69(6):1172-  
25 78. doi: 10.1590/0034-7167-2016-0262 [published Online First: 2016/12/08]
- 26 217. Lovink MH, Kars MC, de Man-van Ginkel JM, et al. Patients' experiences of safety during  
27 haemodialysis treatment--a qualitative study. *J Adv Nurs* 2015;71(10):2374-83. doi:  
28 10.1111/jan.12690 [published Online First: 2015/05/28]
- 29 218. Nagpal N, Boutin-Foster C, Melendez J, et al. Experiences of patients undergoing dialysis  
30 who are from ethnic and racial minorities. *Journal of renal care* 2017;43(1):29-36.  
31 doi: 10.1111/jorc.12185 [published Online First: 2016/12/16]
- 32 219. Cramm JM, Leensvaart L, Berghout M, et al. Exploring views on what is important for  
33 patient-centred care in end-stage renal disease using Q methodology. *BMC Nephrol*  
34 2015;16(74):74. doi: 10.1186/s12882-015-0071-z [published Online First:  
35 2015/05/29]
- 36 220. Namiki S, Rowe J, Cooke M. Living with home-based haemodialysis: insights from older  
37 people. *J Clin Nurs* 2010;19(3-4):547-55. doi: 10.1111/j.1365-2702.2009.02901.x  
38 [published Online First: 2009/11/06]
- 39 221. DePasquale N, Ephraim PL, Ameling J, et al. Selecting renal replacement therapies: what  
40 do African American and non-African American patients and their families think  
41 others should know? A mixed methods study. *BMC Nephrol* 2013;14:9. doi:  
42 10.1186/1471-2369-14-9 [published Online First: 2013/01/16]
- 43 222. Sahaf RP, Sadat Ilali EPS, Peyrovi HP, et al. Uncertainty, the Overbearing Lived  
44 Experience of the Elderly People Undergoing Hemodialysis: A Qualitative Study. *Int J*  
45 *Community Based Nurs Midwifery* 2017;5(1):13-21. [published Online First:  
46 2017/01/18]
- 47 223. Lee A, Gudex C, Povlsen JV, et al. Patients' views regarding choice of dialysis modality.  
48 *Nephrol Dial Transplant* 2008;23(12):3953-9. doi: 10.1093/ndt/gfn365 [published  
49 Online First: 2008/07/01]
- 50 224. Piccoli GB, Consiglio V, Deagostini MC, et al. Starting together: a focus group for the  
51 organization of a CKD outpatient care unit. *Journal of nephrology* 2010;23(6):699-  
52 704. [published Online First: 2010/04/13]
- 53  
54  
55  
56  
57  
58  
59  
60



- 1  
2  
3 225. Pilger C, Rampari EM, Waidman MAP, et al. Hemodialysis: its meaning and impact in the  
4 elderly life. *Escola Anna Nery - Revista de Enfermagem* 2010;14(4):677-83.
- 5 226. Browne T, Amamoo A, Patzer RE, et al. Everybody needs a cheerleader to get a kidney  
6 transplant: a qualitative study of the patient barriers and facilitators to kidney  
7 transplantation in the Southeastern United States. *BMC Nephrol* 2016;17(1):108.  
8 doi: 10.1186/s12882-016-0326-3 [published Online First: 2016/08/01]
- 9 227. Hollingdale R, Sutton D, Hart K. Facilitating dietary change in renal disease: investigating  
10 patients' perspectives. *Journal of renal care* 2008;34(3):136-42. doi: 10.1111/j.1755-  
11 6686.2008.00034.x [published Online First: 2008/09/13]
- 12 228. Marques FRB, Botelho MR, Marcon SS, et al. Coping strategies used by family members  
13 of individuals receiving hemodialysis. *Texto & Contexto - Enfermagem*  
14 2014;23(4):915-24. doi: 10.1590/0104-07072014002220011
- 15 229. Russ AJ, Shim JK, Kaufman SR. Is there life on dialysis?: time and aging in a clinically  
16 sustained existence. *Med Anthropol* 2005;24(4):297-324.
- 17 230. Winterbottom A, Bekker HL, Conner M, et al. Choosing dialysis modality: decision  
18 making in a chronic illness context. *Health Expect* 2014;17(5):710-23. doi:  
19 10.1111/j.1369-7625.2012.00798.x [published Online First: 2012/07/04]
- 20 231. Davison SN. Facilitating advance care planning for patients with end-stage renal  
21 disease: the patient perspective. *Clin J Am Soc Nephrol* 2006;1(5):1023-8. doi:  
22 10.2215/CJN.01050306 [published Online First: 2007/08/19]
- 23 232. Iles-Smith H. Perceptions and experiences of pre-dialysis patients. *EDTNA/ERCA journal*  
24 2005;31(3):130-3. [published Online First: 2005/12/21]
- 25 233. Wilkinson E, Randhawa G, Brown EA, et al. Communication as care at end of life: an  
26 emerging issue from an exploratory action research study of renal end-of-life care  
27 for ethnic minorities in the UK. *Journal of renal care* 2014;40 Suppl 1:23-9. doi:  
28 10.1111/jorc.12084 [published Online First: 2014/09/05]
- 29 234. Campos CJG, Turato ER. The professional health team, the renal patient undergoing  
30 hemodialysis and interpersonal relationships. *Rev Bras Enferm* 2003;56(5):508-12.
- 31 235. Bailey PK, Ben-Shlomo Y, de Salis I, et al. Better the donor you know? A qualitative  
32 study of renal patients' views on 'altruistic' live-donor kidney transplantation. *Soc Sci*  
33 *Med* 2016;150:104-11. doi: 10.1016/j.socscimed.2015.12.041 [published Online  
34 First: 2016/01/09]
- 35 236. Nygardh A, Malm D, Wikby K, et al. The experience of empowerment in the patient-  
36 staff encounter: the patient's perspective. *J Clin Nurs* 2012;21(5-6):897-904. doi:  
37 10.1111/j.1365-2702.2011.03901.x [published Online First: 2011/11/16]
- 38 237. Tong A, Gow K, Wong G, et al. Patient perspectives of a young adult renal clinic: a  
39 mixed-methods evaluation. *Nephrology* 2015;20(5):352-9. doi: 10.1111/nep.12396  
40 [published Online First: 2015/02/03]
- 41 238. Bridger J. Enabling patients with chronic kidney disease to self-care. *Journal of Renal*  
42 *Nursing* 2009;1(4):173-78.
- 43 239. Ghadami A, Memarian R, Mohamadi E, et al. Patients' experiences from their received  
44 education about the process of kidney transplant: A qualitative study. *Iran J Nurs*  
45 *Midwifery Res* 2012;17(2 Sup1):157-64.
- 46 240. Haspeslagh A, De Bondt K, Kuypers D, et al. Completeness and satisfaction with the  
47 education and information received by patients immediately after kidney transplant:  
48 a mixed-models study. *Prog Transplant* 2013;23(1):12-22. doi: 10.7182/pit2013249  
49 [published Online First: 2013/03/02]
- 50 241. Russell CL, Kilburn E, Conn VS, et al. Medication-taking beliefs of adult renal transplant  
51 recipients. *Clin Nurse Spec* 2003;17(4):200-8; quiz 09-30. [published Online First:  
52 2003/07/19]
- 53  
54  
55  
56  
57  
58  
59  
60

- 1  
2  
3 242. Urstad KH, Wahl AK, Andersen MH, et al. Renal recipients' educational experiences in  
4 the early post-operative phase--a qualitative study. *Scand J Caring Sci*  
5 2012;26(4):635-42. doi: 10.1111/j.1471-6712.2012.00972.x [published Online First:  
6 2012/03/16]
- 7 243. Calestani M, Tonkin-Crine S, Pruthi R, et al. Patient attitudes towards kidney transplant  
8 listing: qualitative findings from the ATTOM study. *Nephrol Dial Transplant*  
9 2014;29(11):2144-50. doi: 10.1093/ndt/gfu188 [published Online First: 2014/07/06]
- 10 244. Ros RL, Kucirka LM, Govindan P, et al. Patient attitudes toward CDC high infectious risk  
11 donor kidney transplantation: inferences from focus groups. *Clin Transplant*  
12 2012;26(2):247-53. doi: 10.1111/j.1399-0012.2011.01469.x [published Online First:  
13 2011/05/11]
- 14 245. Sheu J, Ephraim PL, Powe NR, et al. African American and non-African American  
15 patients' and families' decision making about renal replacement therapies. *Qual*  
16 *Health Res* 2012;22(7):997-1006. doi: 10.1177/1049732312443427 [published  
17 Online First: 2012/05/31]
- 18 246. Aasen EM, Kvangarsnes M, Wold B, et al. The next of kin of older people undergoing  
19 haemodialysis: a discursive perspective on perceptions of participation. *J Adv Nurs*  
20 2012;68(8):1716-25. doi: 10.1111/j.1365-2648.2011.05854.x [published Online First:  
21 2011/10/18]
- 22 247. Thomé EGdR, Meyer DEE. Women caregivers for men with chronic kidney disease: a  
23 cultural approach. *Text Context Nursing* 2011;20(3):503-11.
- 24 248. Harwood L, Locking-Cusolito H, Spittal J, et al. Preparing for hemodialysis: patient  
25 stressors and responses. *Nephrol Nurs J* 2005;32(3):295-302; quiz 03. [published  
26 Online First: 2005/07/23]
- 27 249. Yodchai K, Dunning T, Savage S, et al. The role of religion and spirituality in coping with  
28 kidney disease and haemodialysis in Thailand. *Scand J Caring Sci* 2017;31(2):359-67.  
29 doi: 10.1111/scs.12355 [published Online First: 2016/06/22]
- 30 250. Wise M, Schatell D, Klicko K, et al. Successful daily home hemodialysis patient-care  
31 partner dyads: benefits outweigh burdens. *Hemodial Int* 2010;14(3):278-88. doi:  
32 10.1111/j.1542-4758.2010.00443.x [published Online First: 2010/05/25]
- 33 251. Calvin AO. Haemodialysis patients and end-of-life decisions: a theory of personal  
34 preservation. *J Adv Nurs* 2004;46(5):558-66. doi: 10.1111/j.1365-2648.2004.03030.x  
35 [published Online First: 2004/05/14]
- 36 252. Bath J, Tonks S, Edwards P. Psychological care of the haemodialysis patient.  
37 *EDTNA/ERCA journal* 2003;29(2):85-8. [published Online First: 2003/11/06]
- 38 253. Weil CM. Exploring hope in patients with end stage renal disease on chronic  
39 hemodialysis. *Nephrol Nurs J* 2000;27(2):219-24. [published Online First:  
40 2000/12/09]
- 41 254. Wells SA. Occupational Deprivation or Occupational Adaptation of Mexican Americans  
42 on Renal Dialysis. *Occup Ther Int* 2015;22(4):174-82. doi: 10.1002/oti.1394  
43 [published Online First: 2015/06/09]
- 44 255. Wilson PM, Reston JD, Bieraugel R, et al. You cannot choose your family: sociological  
45 ambivalence in the hemodialysis unit. *Qual Health Res* 2015;25(1):27-39. doi:  
46 10.1177/1049732314549030 [published Online First: 2014/09/11]
- 47 256. Lenci LT, Campbell JD. Peritoneal dialysis in elderly patients. *Adv Perit Dial* 2012;28:79-  
48 83. [published Online First: 2013/01/15]
- 49 257. Walton J. Prayer warriors: a grounded theory study of American Indians receiving  
50 hemodialysis. *Nephrol Nurs J* 2007;34(4):377-86; quiz 87.
- 51 258. Walton J. Finding a balance: a grounded theory study of spirituality in hemodialysis  
52 patients. *Nephrol Nurs J* 2002;29(5):447-56; discussion 57. [published Online First:  
53 2002/11/19]
- 54  
55  
56  
57  
58  
59  
60

- 1  
2  
3 259. Santos BPd, Schwartz E, Beuter M, et al. Consequences attributed to kidney  
4 transplantation: critical incident technique. *Texto & Contexto - Enfermagem*  
5 2015;24(3):748-55. doi: 10.1590/0104-07072015000270014
- 6 260. Ravenscroft EF. Diabetes and kidney failure: how individuals with diabetes experience  
7 kidney failure. *Nephrol Nurs J* 2005;32(4):502-10.
- 8 261. Williams AF, Manias E, Walker R. The role of irrational thought in medicine adherence:  
9 people with diabetic kidney disease. *J Adv Nurs* 2009;65(10):2108-17. doi:  
10 10.1111/j.1365-2648.2009.05077.x [published Online First: 2009/08/14]
- 11 262. Lindberg MBcm-A, Helena: LindstrÅm, Rosmarie: Lindberg, Maria. Dry weight from the  
12 haemodialysis patient perspective. 2013;9(2):68-73.
- 13 263. Vestman C, Hasselroth M, Berglund M. Freedom and confinement: patients'  
14 experiences of life with home haemodialysis. *Nurs Res Pract* 2014;2014:252643. doi:  
15 10.1155/2014/252643 [published Online First: 2015/01/15]
- 16 264. Curtin RB, Mapes D, Petillo M, et al. Long-term dialysis survivors: a transformational  
17 experience. *Qual Health Res* 2002;12(5):609-24. doi: 10.1177/104973202129120133  
18 [published Online First: 2002/05/08]
- 19 265. Curtin RB, Mapes DL. Health care management strategies of long-term dialysis  
20 survivors. *Nephrol Nurs J* 2001;28(4):385-92; discussion 93-4. [published Online First:  
21 2002/07/30]
- 22 266. Lederer S, Fischer MJ, Gordon HS, et al. Barriers to effective communication between  
23 veterans with chronic kidney disease and their healthcare providers. *Clin Kidney J*  
24 2015;8(6):766-71. doi: 10.1093/ckj/sfv079 [published Online First: 2015/11/28]
- 25 267. McKillop G, Joy J. Patients' experience and perceptions of polypharmacy in chronic  
26 kidney disease and its impact on adherent behaviour. *Journal of renal care*  
27 2013;39(4):200-7. doi: 10.1111/j.1755-6686.2013.12037.x [published Online First:  
28 2013/11/20]
- 29 268. Reid K, Morris M, Cormack M, et al. Exploring the process of adjusting to diabetic  
30 kidney disease. *Journal of renal care* 2012;38 Suppl 1:30-9. doi: 10.1111/j.1755-  
31 6686.2012.00278.x [published Online First: 2012/03/01]
- 32 269. Ladin K, Buttafarro K, Hahn E, et al. "End-of-Life Care? I'm not Going to Worry About  
33 That Yet." Health Literacy Gaps and End-of-Life Planning Among Elderly Dialysis  
34 Patients. *Gerontologist* 2017;00(00):1-10. doi: 10.1093/geront/gnw267 [published  
35 Online First: 2017/03/23]
- 36 270. Harwood L, Clark AM. Dialysis modality decision-making for older adults with chronic  
37 kidney disease. *J Clin Nurs* 2014;23(23-24):3378-90. doi: 10.1111/jocn.12582  
38 [published Online First: 2014/03/22]
- 39 271. Llewellyn H, Low J, Smith G, et al. Narratives of continuity among older people with late  
40 stage chronic kidney disease who decline dialysis. *Soc Sci Med* 2014;114:49-56. doi:  
41 10.1016/j.socscimed.2014.05.037 [published Online First: 2014/06/10]
- 42 272. Schell JO, Patel UD, Steinhauer KE, et al. Discussions of the kidney disease trajectory by  
43 elderly patients and nephrologists: a qualitative study. *Am J Kidney Dis*  
44 2012;59(4):495-503. doi: 10.1053/j.ajkd.2011.11.023 [published Online First:  
45 2012/01/10]
- 46 273. Walker RC, Morton RL, Tong A, et al. Patient and caregiver preferences for home  
47 dialysis-the home first study: a protocol for qualitative interviews and discrete  
48 choice experiments. *BMJ Open* 2015;5(4):e007405. doi: 10.1136/bmjopen-2014-  
49 007405 [published Online First: 2015/04/17]
- 50 274. Landreneau KJ, Smith PW. Patients' perceptions concerning choice among renal  
51 replacement therapies: A pilot study. *Nephrol Nurs J* 2006;33(4):397-402.  
52  
53  
54  
55  
56  
57  
58  
59  
60

- 1  
2  
3 275. Shaw R. Being-in-dialysis: The experience of the machine-body for home dialysis users.  
4 *Health (London)* 2015;19(3):229-44. doi: 10.1177/1363459314539775 [published  
5 Online First: 2014/06/21]
- 6 276. Visser A, Dijkstra GJ, Kuiper D, et al. Accepting or declining dialysis: considerations  
7 taken into account by elderly patients with end-stage renal disease. *J Nephrol*  
8 2009;22(6):794-99.
- 9 277. de Rosenroll A, Higuchi KS, Dutton KS, et al. Perspectives of significant others in dialysis  
10 modality decision-making: a qualitative study. *CANNT journal = Journal ACITN*  
11 2013;23(4):17-24. [published Online First: 2014/03/26]
- 12 278. Landreneau KJ, Ward-Smith P. Perceptions of Adult Patients on Hemodialysis  
13 Concerning Choice Among Renal Replacement Therapies. *Nephrol Nurs J*  
14 2007;34(5):513-19.
- 15 279. Cases A, Dempster M, Davies M, et al. The experience of individuals with renal failure  
16 participating in home haemodialysis: an interpretative phenomenological analysis. *J*  
17 *Health Psychol* 2011;16(6):884-94. doi: 10.1177/1359105310393541 [published  
18 Online First: 2011/03/31]
- 19 280. Lindsay H, MacGregor C, Fry M. The experience of living with chronic illness for the  
20 haemodialysis patient: An interpretative phenomenological analysis. *Health Sociol*  
21 *Rev* 2014;23(3):232-41.
- 22 281. Darrell L. Faith that God cares: the experience of spirituality with African American  
23 hemodialysis patients. *Social Work & Christianity* 2016;43(2):189-212.
- 24 282. Hagren B, Pettersen I-M, Severinsson E, et al. The haemodialysis machine as a lifeline:  
25 experiences of suffering from end-stage renal disease. *J Adv Nurs* 2001;34(2):196-  
26 202. doi: 10.1046/j.1365-2648.2001.01745.x
- 27 283. Harrington J, Morgan M. Understanding kidney transplant patients' treatment choices:  
28 The interaction of emotion with medical and social influences on risk preferences.  
29 *Soc Sci Med* 2016;155:43-50. doi: 10.1016/j.socscimed.2016.02.027 [published  
30 Online First: 2016/03/18]
- 31 284. Herlin C, Wann-Hansson C. The experience of being 30-45 years of age and depending  
32 on haemodialysis treatment: a phenomenological study. *Scand J Caring Sci*  
33 2010;24(4):693-9. doi: 10.1111/j.1471-6712.2009.00764.x [published Online First:  
34 2010/04/23]
- 35 285. Lewis H, Arber S. The role of the body in end-stage kidney disease in young adults:  
36 Gender, peer and intimate relationships. *Chronic Illn* 2015;11(3):184-97. doi:  
37 10.1177/1742395314566823 [published Online First: 2015/01/16]
- 38 286. Pelletier-Hibbert M, Sohi P. Sources of uncertainty and coping strategies used by family  
39 members of individuals living with end stage renal disease. *Nephrol Nurs J*  
40 2001;28(4):411-9.
- 41 287. Aasen EM. A comparison of the discursive practices of perception of patient  
42 participation in haemodialysis units. *Nurs Ethics* 2015;22(3):341-51. doi:  
43 10.1177/0969733014533240 [published Online First: 2014/06/18]
- 44 288. Goff SL, Eneanya ND, Feinberg R, et al. Advance care planning: a qualitative study of  
45 dialysis patients and families. *Clin J Am Soc Nephrol* 2015;10(3):390-400. doi:  
46 10.2215/CJN.07490714 [published Online First: 2015/02/15]
- 47 289. Nygardh A, Wikby K, Malm D, et al. Empowerment in outpatient care for patients with  
48 chronic kidney disease - from the family member's perspective. *BMC Nurs*  
49 2011;10(21):21. doi: 10.1186/1472-6955-10-21 [published Online First: 2011/11/01]
- 50 290. Hutchison LA, Raffin-Bouchal DS, Syme CA, et al. Readiness to participate in advance  
51 care planning: A qualitative study of renal failure patients, families and healthcare  
52 providers. *Chronic Illn* 2017;13(3):171-87. doi: 10.1177/1742395316675023  
53 [published Online First: 2017/01/31]
- 54  
55  
56  
57  
58  
59  
60

- 1  
2  
3 291. Davison SN, Simpson C. Hope and advance care planning in patients with end stage  
4 renal disease: qualitative interview study. *BMJ* 2006;333(7574):886. doi:  
5 10.1136/bmj.38965.626250.55 [published Online First: 2006/09/23]  
6 292. Calvin AO, Engebretson JC, Sardual SA. Understanding of advance care planning by  
7 family members of persons undergoing hemodialysis. *West J Nurs Res*  
8 2014;36(10):1357-73. doi: 10.1177/0193945913514637 [published Online First:  
9 2013/12/12]  
10 293. Noble H, Meyer J, Bridges J, et al. Reasons renal patients give for deciding not to  
11 dialyze: A prospective qualitative interview study. *Dial Transplant* 2009;38(3):1-5.  
12 294. Molzahn A, Sheilds L, Bruce A, et al. Perceptions Regarding Death and Dying of  
13 Individuals with Chronic Kidney Disease. *Nephrol Nurs J* 2012;39(3):197-204.  
14 295. Casey JR, Hanson CS, Winkelmayr WC, et al. Patients' perspectives on hemodialysis  
15 vascular access: a systematic review of qualitative studies. *Am J Kidney Dis*  
16 2014;64(6):937-53. doi: 10.1053/j.ajkd.2014.06.024 [published Online First:  
17 2014/08/15]  
18 296. Jamieson NJ, Hanson CS, Josephson MA, et al. Motivations, Challenges, and Attitudes to  
19 Self-management in Kidney Transplant Recipients: A Systematic Review of  
20 Qualitative Studies. *Am J Kidney Dis* 2016;67(3):461-78. doi:  
21 10.1053/j.ajkd.2015.07.030 [published Online First: 2015/09/16]  
22 297. Palmer SC, Hanson CS, Craig JC, et al. Dietary and fluid restrictions in CKD: a thematic  
23 synthesis of patient views from qualitative studies. *Am J Kidney Dis* 2015;65(4):559-  
24 73. doi: 10.1053/j.ajkd.2014.09.012 [published Online First: 2014/12/03]  
25 298. Ralph A, Chapman JR, Gillis J, et al. Family perspectives on deceased organ donation:  
26 thematic synthesis of qualitative studies. *Am J Transplant* 2014;14(4):923-35. doi:  
27 10.1111/ajt.12660 [published Online First: 2014/03/13]  
28 299. Tong A, Brown MA, Winkelmayr WC, et al. Perspectives on Pregnancy in Women With  
29 CKD: A Semistructured Interview Study. *Am J Kidney Dis* 2015;66(6):951-61. doi:  
30 10.1053/j.ajkd.2015.08.023 [published Online First: 2015/10/11]  
31 300. Tong A, Chapman JR, Wong G, et al. The experiences of commercial kidney donors:  
32 thematic synthesis of qualitative research. *Transpl Int* 2012;25(11):1138-49. doi:  
33 10.1111/j.1432-2277.2012.01534.x [published Online First: 2012/07/27]  
34 301. Tong A, Cheung KL, Nair SS, et al. Thematic synthesis of qualitative studies on patient  
35 and caregiver perspectives on end-of-life care in CKD. *Am J Kidney Dis*  
36 2014;63(6):913-27. doi: 10.1053/j.ajkd.2013.11.017 [published Online First:  
37 2014/01/15]  
38 302. Tong A, Jesudason S, Craig JC, et al. Perspectives on pregnancy in women with chronic  
39 kidney disease: systematic review of qualitative studies. *Nephrol Dial Transplant*  
40 2015;30(4):652-61. doi: 10.1093/ndt/gfu378 [published Online First: 2014/12/20]  
41 303. Tong A, Lowe A, Sainsbury P, et al. Experiences of parents who have children with  
42 chronic kidney disease: a systematic review of qualitative studies. *Pediatrics*  
43 2008;121(2):349-60. doi: 10.1542/peds.2006-3470 [published Online First:  
44 2008/02/05]  
45 304. Tong A, Rangan GK, Ruospo M, et al. A painful inheritance-patient perspectives on living  
46 with polycystic kidney disease: thematic synthesis of qualitative research. *Nephrol*  
47 *Dial Transplant* 2015;30(5):790-800. doi: 10.1093/ndt/gfv010 [published Online  
48 First: 2015/02/01]  
49 305. Walker RC, Hanson CS, Palmer SC, et al. Patient and caregiver perspectives on home  
50 hemodialysis: a systematic review. *Am J Kidney Dis* 2015;65(3):451-63. doi:  
51 10.1053/j.ajkd.2014.10.020 [published Online First: 2015/01/15]  
52 306. Tong A, Hanson CS, Chapman JR, et al. 'Suspended in a paradox'-patient attitudes to  
53 wait-listing for kidney transplantation: systematic review and thematic synthesis of  
54  
55  
56  
57  
58  
59  
60



- 1  
2  
3 qualitative studies. *Transpl Int* 2015;28(7):771-87. doi: 10.1111/tri.12575 [published  
4 Online First: 2015/04/08]
- 5 307. Bailey P, Tomson C, Risdale S, et al. From potential donor to actual donation: does  
6 socioeconomic position affect living kidney donation? A systematic review of the  
7 evidence. *Transplantation* 2014;98(9):918-26. doi: 10.1097/TP.0000000000000428  
8 [published Online First: 2014/09/25]
- 9 308. Reid C, Seymour J, Jones C. A Thematic Synthesis of the Experiences of Adults Living  
10 with Hemodialysis. *Clin J Am Soc Nephrol* 2016;11(7):1206-18. doi:  
11 10.2215/CJN.10561015 [published Online First: 2016/06/02]
- 12 309. Arokiasamy P, Uttamacharya U, Jain K, et al. The impact of multimorbidity on adult  
13 physical and mental health in low- and middle-income countries: what does the  
14 study on global ageing and adult health (SAGE) reveal? *BMC Med* 2015;13:178. doi:  
15 10.1186/s12916-015-0402-8 [published Online First: 2015/08/05]
- 16 310. Kim TJ, Vonneilich N, Ludecke D, et al. Income, financial barriers to health care and  
17 public health expenditure: A multilevel analysis of 28 countries. *Soc Sci Med*  
18 2017;176:158-65. doi: 10.1016/j.socscimed.2017.01.044 [published Online First:  
19 2017/02/06]
- 20 311. Mackenbach JP, Looman CW, Artnik B, et al. 'Fundamental causes' of inequalities in  
21 mortality: an empirical test of the theory in 20 European populations. *Social Health*  
22 *Illn* 2017 doi: 10.1111/1467-9566.12562 [published Online First: 2017/04/04]
- 23 312. Prasad N, Jha V. Hemodialysis in Asia. *Kidney Dis (Basel)* 2015;1(3):165-77. doi:  
24 10.1159/000441816 [published Online First: 2016/08/19]
- 25 313. Rajapurkar MM, John GT, Kirpalani AL, et al. What do we know about chronic kidney  
26 disease in India: first report of the Indian CKD registry. *BMC Nephrol* 2012;13:10. doi:  
27 10.1186/1471-2369-13-10 [published Online First: 2012/03/07]
- 28 314. Obrador GT, Rubilar X, Agazzi E, et al. The Challenge of Providing Renal Replacement  
29 Therapy in Developing Countries: The Latin American Perspective. *Am J Kidney Dis*  
30 2016;67(3):499-506. doi: 10.1053/j.ajkd.2015.08.033 [published Online First:  
31 2015/12/29]
- 32 315. Mackenbach JP. The persistence of health inequalities in modern welfare states: the  
33 explanation of a paradox. *Soc Sci Med* 2012;75(4):761-9. doi:  
34 10.1016/j.socscimed.2012.02.031 [published Online First: 2012/04/06]
- 35 316. Rodriguez RA. Dialysis for undocumented immigrants in the United States. *Adv Chronic*  
36 *Kidney Dis* 2015;22(1):60-5. doi: 10.1053/j.ackd.2014.07.003 [published Online First:  
37 2015/01/13]
- 38 317. Pavli A, Maltezou H. Health problems of newly arrived migrants and refugees in Europe.  
39 *J Travel Med* 2017;24(4) doi: 10.1093/jtm/tax016 [published Online First:  
40 2017/04/21]
- 41 318. Matesanz R, Marazuela R, Dominguez-Gil B, et al. The 40 donors per million population  
42 plan: an action plan for improvement of organ donation and transplantation in  
43 Spain. *Transplant Proc* 2009;41(8):3453-6. doi: 10.1016/j.transproceed.2009.09.011  
44 [published Online First: 2009/10/28]
- 45 319. Acevedo-Garcia D. Special Issue Introduction: Place, Migration and Health. *Soc Sci Med*  
46 2012 doi: 10.1016/j.socscimed.2012.09.016
- 47 320. Terasaki G, Ahrenholz NC, Haider MZ. Care of Adult Refugees with Chronic Conditions.  
48 *Med Clin North Am* 2015;99(5):1039-58. doi: 10.1016/j.mcna.2015.05.006 [published  
49 Online First: 2015/09/01]
- 50 321. Van Biesen W, Vanholder R, Hernandez T, et al. Caring for Migrants and Refugees With  
51 End-Stage Kidney Disease in Europe. *Am J Kidney Dis* 2017 doi:  
52 10.1053/j.ajkd.2017.10.015 [published Online First: 2017/12/25]
- 53  
54  
55  
56  
57  
58  
59  
60

- 1  
2  
3 322. Raghavan R. Caring for Undocumented Immigrants With Kidney Disease. *Am J Kidney Dis* 2018;71(4):488-94. doi: 10.1053/j.ajkd.2017.09.011 [published Online First: 2017/12/05]
- 4  
5  
6 323. Wild V, Dawson A. Migration: a core public health ethics issue. *Public Health* 2018 doi: 10.1016/j.puhe.2018.02.023 [published Online First: 2018/04/03]
- 7  
8 324. Luyckx VA, Miljeteig I, Ejigu AM, et al. Ethical Challenges in the Provision of Dialysis in Resource-Constrained Environments. *Semin Nephrol* 2017;37(3):273-86. doi: 10.1016/j.semnephrol.2017.02.007 [published Online First: 2017/05/24]
- 9  
10  
11 325. Qazi HA, Chen H, Zhu M. Factors influencing dialysis withdrawal: a scoping review. *BMC Nephrol* 2018;19(1):96. doi: 10.1186/s12882-018-0894-5 [published Online First: 2018/04/28]
- 12  
13  
14 326. Chaves EdCL, Carvalho TPd, Carvalho CC, et al. Associação entre Bem-Estar Espiritual e Autoestima em Pessoas com Insuficiência Renal Crônica em Hemodiálise. *Psicologia: Reflexão e Crítica* 2015;28(4):737-43. doi: 10.1590/1678-7153.201528411
- 15  
16  
17 327. Cruz JP, Colet PC, Alquevez N, et al. Influence of religiosity and spiritual coping on health-related quality of life in Saudi haemodialysis patients. *Hemodial Int* 2017;21(1):125-32. doi: 10.1111/hdi.12441 [published Online First: 2016/06/23]
- 18  
19  
20 328. Saisunantararom W, Cheawchanwattana A, Kanjanabuch T, et al. Associations among Spirituality, Health-Related Quality of Life, and Depression in Pre-Dialysis Chronic Kidney Disease Patients: An Exploratory Analysis in Thai Buddhist Patients. *Religions* 2015;6(4):1249-62. doi: 10.3390/rel6041249
- 21  
22  
23 329. Lucchetti G, Almeida LGCd, Granero AL. Spirituality for dialysis patients: should the nephrologist address? *J Bras Nefrol* 2010;32(1):126-30.
- 24  
25  
26 330. Dwarswaard J, Bakker EJ, van Staa A, et al. Self-management support from the perspective of patients with a chronic condition: a thematic synthesis of qualitative studies. *Health Expect* 2016;19(2):194-208. doi: 10.1111/hex.12346 [published Online First: 2015/01/27]
- 27  
28  
29 331. Morton RL, Tong A, Howard K, et al. The views of patients and carers in treatment decision making for chronic kidney disease: systematic review and thematic synthesis of qualitative studies. *BMJ* 2010;340:c112. doi: 10.1136/bmj.c112 [published Online First: 2010/01/21]
- 30  
31  
32 332. Shommu NS, Ahmed S, Rumana N, et al. What is the scope of improving immigrant and ethnic minority healthcare using community navigators: A systematic scoping review. *Int J Equity Health* 2016;15:6. doi: 10.1186/s12939-016-0298-8 [published Online First: 2016/01/16]
- 33  
34  
35 333. Boehmer KR, Shippee ND, Beebe TJ, et al. Pursuing minimally disruptive medicine: disruption from illness and health care-related demands is correlated with patient capacity. *J Clin Epidemiol* 2016;74:227-36. doi: 10.1016/j.jclinepi.2016.01.006 [published Online First: 2016/01/19]
- 36  
37  
38 334. Jha V, Garcia-Garcia G, Iseki K, et al. Chronic kidney disease: global dimension and perspectives. *Lancet* 2013;382(9888):260-72. doi: 10.1016/S0140-6736(13)60687-X [published Online First: 2013/06/04]
- 39  
40  
41 335. Rosenzweig A, Kuspinar A, Daskalopoulou SS, et al. Toward patient-centered care: a systematic review of how to ask questions that matter to patients. *Medicine (Baltimore)* 2014;93(22):e120. doi: 10.1097/MD.000000000000120 [published Online First: 2014/11/15]
- 42  
43  
44 336. Nugent RA, Fathima SF, Feigl AB, et al. The burden of chronic kidney disease on developing nations: a 21st century challenge in global health. *Nephron Clin Pract* 2011;118(3):c269-77. doi: 10.1159/000321382 [published Online First: 2011/01/08]
- 45  
46  
47  
48  
49  
50  
51  
52  
53  
54  
55  
56  
57  
58  
59  
60

- 1  
2  
3 337. Garcia-Garcia G, Jha V, World Kidney Day Steering C. Chronic kidney disease in  
4 disadvantaged populations. *Transplantation* 2015;99(1):13-6. doi:  
5 10.1097/TP.0000000000000558 [published Online First: 2014/12/20]  
6 338. Silva AS, Silveira RS, Fernandes GF, et al. [Perceptions and changes in the quality of life  
7 of patients submitted to hemodialysis]. *Rev Bras Enferm* 2011;64(5):839-44.  
8 [published Online First: 2012/03/31]  
9 339. Gullick J, Monaro S, Stewart G. Compartmentalising time and space: a  
10 phenomenological interpretation of the temporal experience of commencing  
11 haemodialysis. *J Clin Nurs* 2016:1-14. doi: 10.1111/jocn.13697 [published Online  
12 First: 2016/12/22]  
13 340. Kaba E, Bellou P, Iordanou P, et al. Problems experienced by haemodialysis patients in  
14 Greece. *Br J Nurs* 2007;16(14):868-72. doi: 10.12968/bjon.2007.16.14.24325  
15 [published Online First: 2007/09/14]  
16  
17  
18  
19  
20

## 21 TITLES AND LEGENDS OF TABLES AND FIGURES

22  
23 Table 1. PICO criteria for including studies.

24  
25 No legend  
26  
27  
28  
29

30 Table 2. Characteristics of studies included in the review.

31  
32 Legend: Abbreviations: C, centre, unit, or clinic; CKD, chronic kidney disease; D,  
33 dialysis; ESKD, end-stage kidney disease; GP, general practice; H, hospital; HD,  
34 hemodialysis; NKF, National Kidney Foundation (Singapore); NP, nephrology practice;  
35 PD, peritoneal dialysis. \*includes health care staff  
36  
37  
38  
39  
40  
41  
42  
43

44 Table 3. Illustrative quotations.

45  
46 No legend  
47  
48  
49  
50

51 Table 4. Summary of results

52  
53 No legend  
54  
55  
56  
57  
58  
59  
60



1  
2  
3 Table 5. Challenges related to burden of treatment  
4

5 Legend: Abbreviations: CKD, chronic kidney disease; ESKD, end-stage kidney disease;  
6

7 HIC, high income country; LMIC, low- and middle income country. Severity: + mild,  
8

9 ++ moderate, +++ very severe.  
10  
11  
12  
13

14 Figure 1. PRISMA flow chart of screening and selection process  
15

16 No legend  
17  
18  
19  
20

21 Figure 2. Thematic schema of experienced control and cognitive authority in CKD.  
22

23 No legend.  
24  
25  
26  
27  
28  
29  
30  
31  
32  
33  
34  
35  
36  
37  
38  
39  
40  
41  
42  
43  
44  
45  
46  
47  
48  
49  
50  
51  
52  
53  
54  
55  
56  
57  
58  
59  
60

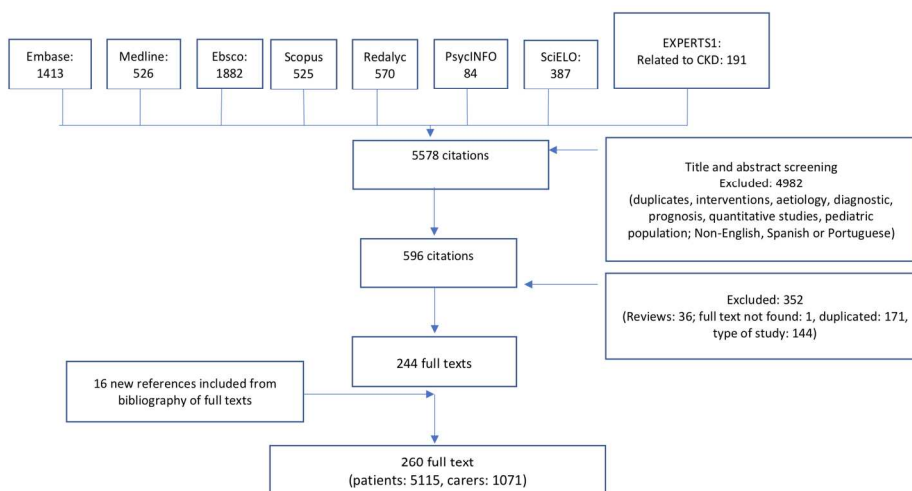

Figure 1. PRISMA flow chart of screening and selection process

review only

1  
2  
3  
4  
5  
6  
7  
8  
9  
10  
11  
12  
13  
14  
15  
16  
17  
18  
19  
20  
21  
22  
23  
24  
25  
26  
27  
28  
29  
30  
31  
32  
33  
34  
35  
36  
37  
38  
39  
40  
41  
42  
43  
44  
45  
46  
47  
48  
49  
50  
51  
52  
53  
54  
55  
56  
57  
58  
59  
60

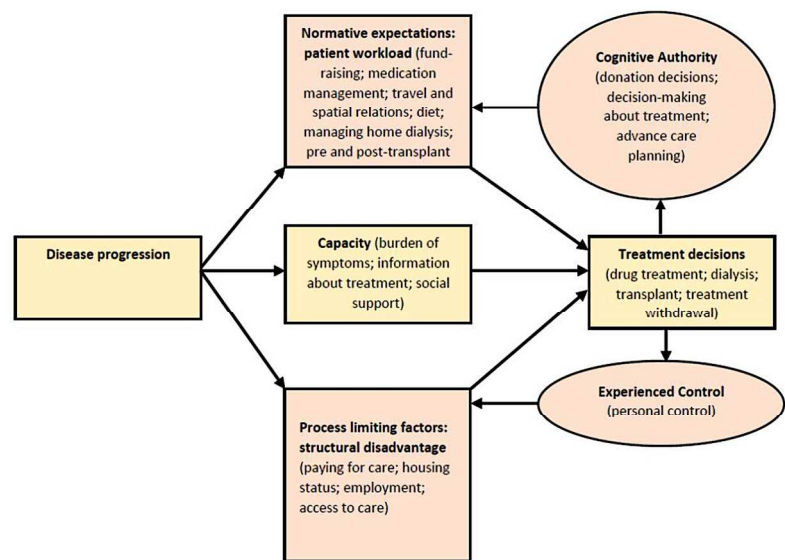

Figure 2. Thematic schema of experienced control and cognitive authority in CKD.

iew only

## Appendix 1. Search strategy

- 1 exp Renal Insufficiency, Chronic/
- 2 Renal Insufficiency/
- 3 exp Renal Replacement Therapy/
- 4 Hemodialysis Units, Hospital/
- 5 (chronic kidney or chronic renal or chronic nephropath\*).ti,ab,kf.
- 6 (kidney failure\*1 or renal failure\*1).ti,ab,kf.
- 7 (renal insufficienc\* or kidney insufficienc\*).ti,ab,kf.
- 8 (dialysis or predialysis).ti,ab,kf.
- 9 (hemodialysis or haemodialysis).ti,ab,kf.
- 10 (hemofiltration or haemofiltration).ti,ab,kf.
- 11 (hemodiafiltration or haemodiafiltration).ti,ab,kf.
- 12 (end-stage renal or end-stage kidney or endstage renal or endstage kidney).ti,ab,kf.
- 13 (stage 5 and (renal disease\*1 or kidney disease\*1)).ti,ab,kf.
- 14 (kidney transplant\* or renal transplant\* or kidney graft\* or renal graft\* or kidney replacement\*1 or renal replacement\*1).ti,ab,kf.
- 15 (CKF or CKD or CRF or CRD).ti,ab,kf.
- 16 (ESKD or ESRD or ESKF or ESRF).ti,ab,kf.
- 17 (CAPD or CCPD or APD).ti,ab,kf.
- 18 or/1-17
- 19 exp qualitative research/
- 20 qualitativ\*.ti,ab,kf.
- 21 interviews as topic/
- 22 interview\*.ti,ab,kf.
- 23 focus groups/
- 24 focus group\*1.ti,ab,kf.
- 25 grounded theory/ or (grounded theor\* or grounded study or grounded studies or grounded research or grounded analys\*).ti,ab,kf.
- 26 phenomenol\*.ti,ab,kf.
- 27 (ethnograph\* or ethnonurs\* or ethno-graph\* or ethno-nurs\*).ti,ab,kf.
- 28 (story or stories or storytelling or narrative\*1 or narration\*1).ti,ab,kf.
- 29 (open-ended or open question\* or text\*).ti,ab,kf.
- 30 Narration/ or personal narratives/ or personal narratives as topic/
- 31 (discourse\* analys\* or discours\* analys\*).ti,ab,kf.
- 32 content\* analys\*.ti,ab,kf.
- 33 ethnological.ti,ab,kf.
- 34 purposive sampl\*.ti,ab,kf.
- 35 (constant comparative or constant comparison\*1).ti,ab,kf.
- 36 theoretical sampl\*.ti,ab,kf.
- 37 (theme\* or thematic\*).ti,ab,kf.
- 38 (emic or etic or hermeneutic\* or heuristic\* or semiotic\*).ti,ab,kf.
- 39 data saturat\*.ti,ab,kf.
- 40 participant observ\*.ti,ab,kf.

- 1  
2  
3 41 exp Humanism/ or (humanistic\* or existential\* or experiential\* or paradigm\*).ti,ab,kf.  
4 42 Postmodernism/ or (social construct\* or postmodern\* or post-modern\* or poststructural\* or post-structural\* or  
5 feminis\* or constructivis\*).ti,ab,kf.  
6 43 (action research or cooperative inquir\* or co-operative inquir\*).ti,ab,kf.  
7 44 human science.ti,ab,kf.  
8 45 biographical method\*.ti,ab,kf.  
9 46 life world.ti,ab,kf.  
10 47 theoretical saturation.ti,ab,kf.  
11 48 group discussion\*1.ti,ab,kf.  
12 49 direct observation\*.ti,ab,kf.  
13 50 mixed method\*.ti,ab,kf.  
14 51 (observational method\* or observational approach\*).ti,ab,kf.  
15 52 key informant\*1.ti,ab,kf.  
16 53 (field study or field studies or field research\* or field work\* or fieldwork\*).ti,ab,kf.  
17 54 (semi-structured or semistructured or unstructured or un-structured or informal or in-depth or indepth).ti,ab,kf.  
18 55 "face-to-face".ti,ab,kf.  
19 56 ((guide or structured) adj5 (discussion\*1 or questionnaire\*1)).ti,ab,kf.  
20 57 (heidegger\* or colaizzi\* or speigelberg\* or van manen\* or van kaam\* or merleau ponty\* or husserl\* or giorgi\*  
21 or foucault\* or corbin\* or glaser\*).ti,ab,kf.  
22 58 or/19-57  
23 59 Consumer Behavior/  
24 60 attitude/ or exp attitude to health/ or Attitude to Death/  
25 61 personal satisfaction/  
26 62 exp Emotions/  
27 63 Stress, psychological/  
28 64 exp Patients/px  
29 65 Caregivers/px  
30 66 professional-patient relations/ or nurse-patient relations/ or physician-patient relations/  
31 67 professional-family relations/  
32 68 Empathy/  
33 69 Feedback/  
34 70 ((patient\*1 or client\*1 or user\*1 or consumer\*1 or personal or carer\*1 or caregiver\*1 or care-giver\* or  
35 family\*1 or families) and (experienc\* or perspective\*1 or perception\*1 or opinion\*1 or account or accounts or  
36 attitude\*1 or view or views or viewpoint\*1 or satisf\* or unsatisf\* or dissatisf\* or disatisf\* or belief\*1 or  
37 believ\*).ti.  
38 71 ((patient\*1 or client\*1 or user\*1 or consumer\*1 or personal or carer\*1 or caregiver\*1 or care-giver\* or  
39 family\*1 or families) adj3 (experienc\* or perspective\*1 or perception\*1 or opinion\*1 or account or accounts or  
40 attitude\*1 or view or views or viewpoint\*1 or satisf\* or unsatisf\* or dissatisf\* or disatisf\* or belief\*1 or  
41 believ\*).ab,kf.  
42 72 ((patient\*1 or client\*1 or user\*1 or consumer\*1 or personal or carer\*1 or caregiver\*1 or care-giver\* or  
43 family\*1 or families) and (emotion\* or feeling\*1 or happy or happiness or unhappy or unhappiness or sad or  
44 sadness or anger or angry or anxiet\* or anxious\* or worry or worries or worried or worrying or troubled or  
45 troubling or troubles or troublesome or trouble-some or frustrat\* or stress\* or distress\* or embarrass\* or  
46 empath\* or accept\* or alone or lonely or loneliness or fear or fears or fearing or feared or afraid or scary or  
47 scared or bother\* or unbother\* or pleased or displeas\* or concern\* or burden\* or hassl\* or convenien\* or

- 1  
2  
3 inconvenien\* or confus\* or hope or hopeless or hopeful or trust or trusts or mistrust\* or distrust\* or entrust\* or  
4 trusting or trusted or confiden\* or unconfiden\*).ti.  
5 73 ((patient\* or client\* or user\* or consumer\* or personal or carer\* or caregiver\* or care-giver\* or family\* or  
6 families) adj3 (emotion\* or feeling\* or happy or happiness or unhappy or unhappiness or sad or sadness or  
7 anger or angry or anxiet\* or anxious\* or worry or worries or worried or worrying or troubled or troubling or  
8 troubles or troublesome or trouble-some or frustrate\* or stress\* or distress\* or embarrass\* or empath\* or  
9 accept\* or alone or lonely or loneliness or fear or fears or fearing or feared or afraid or scary or scared or  
10 bother\* or unbother\* or pleased or displeased\* or concern\* or burden\* or hassl\* or convenien\* or inconvenien\*  
11 or confus\* or hope or hopeless or hopeful or trust or trusts or mistrust\* or distrust\* or entrust\* or trusting or  
12 trusted or confiden\* or unconfiden\*).ab,kf.  
13  
14  
15 74 (life experience\* or lived experience\*1 or actual experience\* or real experience\*1).ti,ab,kf.  
16  
17 75 or/59-74  
18  
19 76 18 and 58 and 75  
20  
21 77 (kidney or renal or nephropath\* or dialysis or predialysis or hemodialysis or haemodialysis or hemofiltration or  
22 haemofiltration or hemodiafiltration or haemodiafiltration or CKF or CKD or CRF or CRD or ESKD or ESRD  
23 or ESKF or ESRF or CAPD or CCPD or APD).ti. (419253)  
24  
25 78 qualitativ\*.ti. or qualitative research/  
26  
27 79 ((patient\* or client\* or user\* or consumer\*1 or personal or carer\* or caregiver\* or care-giver\* or family\* or  
28 families) and experiences).ti.  
29  
30 80 ((patient\* or client\* or user\* or consumer\* or personal or carer\* or caregiver\* or care-giver\* or family\* or  
31 families) adj2 experienc\*).ti.  
32  
33 81 77 and (78 or 79 or 80)  
34  
35 82 76 or 81  
36  
37 83 exp animals/ not humans/  
38  
39 84 (news or comment or editorial or letter or case reports or randomized controlled trial).pt.  
40  
41 85 case report.ti.  
42  
43 86 82 not (83 or 84 or 85)  
44  
45 87 limit 86 to (english spanish portuguese language and yr="2000 -Current")  
46  
47  
48  
49  
50  
51  
52  
53  
54  
55  
56  
57  
58  
59  
60

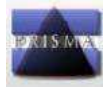

## PRISMA (Preferred Reporting Items for Systematic Reviews and Meta-Analyses) Checklist

[www.prisma-statement.org](http://www.prisma-statement.org)

You must report the page number in your manuscript where you consider each of the items listed in this checklist. If you have not included this information, either revise your manuscript accordingly before submitting or note N/A.

| Section/Topic                      | Item No. | Checklist item                                                                                                                                                                                                                                                                                              | Reported on Page No. |
|------------------------------------|----------|-------------------------------------------------------------------------------------------------------------------------------------------------------------------------------------------------------------------------------------------------------------------------------------------------------------|----------------------|
| <b>TITLE</b>                       |          |                                                                                                                                                                                                                                                                                                             |                      |
| Title                              | 1        | Identify the report as a systematic review, meta-analysis, or both.                                                                                                                                                                                                                                         | 1                    |
| <b>ABSTRACT</b>                    |          |                                                                                                                                                                                                                                                                                                             |                      |
| Structured summary                 | 2        | Provide a structured summary including, as applicable: background; objectives; data sources; study eligibility criteria, participants, and interventions; study appraisal and synthesis methods; results; limitations; conclusions and implications of key findings; systematic review registration number. | 3                    |
| <b>INTRODUCTION</b>                |          |                                                                                                                                                                                                                                                                                                             |                      |
| Rationale                          | 3        | Describe the rationale for the review in the context of what is already known.                                                                                                                                                                                                                              | 4                    |
| Objectives                         | 4        | Provide an explicit statement of questions being addressed with reference to participants, interventions, comparisons, outcomes, and study design (PICOS).                                                                                                                                                  | 4                    |
| <b>METHODS</b>                     |          |                                                                                                                                                                                                                                                                                                             |                      |
| Protocol and registration          | 5        | Indicate if a review protocol exists, if and where it can be accessed (e.g., Web address), and, if available, provide registration information including registration number.                                                                                                                               | 5                    |
| Eligibility criteria               | 6        | Specify study characteristics (e.g., PICOS, length of follow-up) and report characteristics (e.g., years considered, language, publication status) used as criteria for eligibility, giving rationale.                                                                                                      | 5 and table 1        |
| Information sources                | 7        | Describe all information sources (e.g., databases with dates of coverage, contact with study authors to identify additional studies) in the search and date last searched.                                                                                                                                  | 6                    |
| Search                             | 8        | Present full electronic search strategy for at least one database, including any limits used, such that it could be repeated.                                                                                                                                                                               | appendix1            |
| Study selection                    | 9        | State the process for selecting studies (i.e., screening, eligibility, included in systematic review, and, if applicable, included in the meta-analysis).                                                                                                                                                   | 6, 7                 |
| Data collection process            | 10       | Describe method of data extraction from reports (e.g., piloted forms, independently, in duplicate) and any processes for obtaining and confirming data from investigators.                                                                                                                                  | 6, 7                 |
| Data items                         | 11       | List and define all variables for which data were sought (e.g., PICOS, funding sources) and any assumptions and simplifications made.                                                                                                                                                                       | 5, Table 1, 2.       |
| Risk of bias in individual studies | 12       | Describe methods used for assessing risk of bias of individual studies (including specification of whether this was done at the study or outcome level), and how this information is to be used in any data synthesis.                                                                                      | 6                    |

| Section/Topic                 | Item No. | Checklist item                                                                                                                                                                                           | Reported on Page No. |
|-------------------------------|----------|----------------------------------------------------------------------------------------------------------------------------------------------------------------------------------------------------------|----------------------|
| Summary measures              | 13       | State the principal summary measures (e.g., risk ratio, difference in means).                                                                                                                            | NA                   |
| Synthesis of results          | 14       | Describe the methods of handling data and combining results of studies, if done, including measures of consistency (e.g., $I^2$ ) for each meta-analysis.                                                | NA                   |
| Risk of bias across studies   | 15       | Specify any assessment of risk of bias that may affect the cumulative evidence (e.g., publication bias, selective reporting within studies).                                                             | NA                   |
| Additional analyses           | 16       | Describe methods of additional analyses (e.g., sensitivity or subgroup analyses, meta-regression), if done, indicating which were pre-specified.                                                         | NA                   |
| <b>RESULTS</b>                |          |                                                                                                                                                                                                          |                      |
| Study selection               | 17       | Give numbers of studies screened, assessed for eligibility, and included in the review, with reasons for exclusions at each stage, ideally with a flow diagram.                                          | 7 and Fig 2          |
| Study characteristics         | 18       | For each study, present characteristics for which data were extracted (e.g., study size, PICOS, follow-up period) and provide the citations.                                                             | Table 2              |
| Risk of bias within studies   | 19       | Present data on risk of bias of each study and, if available, any outcome level assessment (see item 12).                                                                                                | NA                   |
| Results of individual studies | 20       | For all outcomes considered (benefits or harms), present, for each study: (a) simple summary data for each intervention group (b) effect estimates and confidence intervals, ideally with a forest plot. | Table 2.             |
| Synthesis of results          | 21       | Present results of each meta-analysis done, including confidence intervals and measures of consistency.                                                                                                  | NA                   |
| Risk of bias across studies   | 22       | Present results of any assessment of risk of bias across studies (see Item 15).                                                                                                                          | NA                   |
| Additional analysis           | 23       | Give results of additional analyses, if done (e.g., sensitivity or subgroup analyses, meta-regression [see Item 16]).                                                                                    | NA                   |
| <b>DISCUSSION</b>             |          |                                                                                                                                                                                                          |                      |
| Summary of evidence           | 24       | Summarize the main findings including the strength of evidence for each main outcome; consider their relevance to key groups (e.g., healthcare providers, users, and policy makers).                     | 18                   |
| Limitations                   | 25       | Discuss limitations at study and outcome level (e.g., risk of bias), and at review-level (e.g., incomplete retrieval of identified research, reporting bias).                                            | 22                   |
| Conclusions                   | 26       | Provide a general interpretation of the results in the context of other evidence, and implications for future research.                                                                                  | 22 ss                |
| <b>FUNDING</b>                |          |                                                                                                                                                                                                          |                      |



1  
2  
3  
4  
5  
6  
7  
8  
9  
10  
11  
12  
13  
14  
15  
16  
17  
18  
19  
20  
21  
22  
23  
24  
25  
26  
27  
28  
29  
30  
31  
32  
33  
34  
35  
36  
37  
38  
39  
40  
41  
42  
43  
44  
45  
46  
47

| Section/Topic | Item No. | Checklist item                                                                                                                             | Reported on Page No. |
|---------------|----------|--------------------------------------------------------------------------------------------------------------------------------------------|----------------------|
| Funding       | 27       | Describe sources of funding for the systematic review and other support (e.g., supply of data); role of funders for the systematic review. | 24                   |

*From:* Moher D, Liberati A, Tetzlaff J, Altman DG, The PRISMA Group (2009). Preferred Reporting Items for Systematic Reviews and Meta-Analyses: The PRISMA Statement. PLoS Med 6(6): e1000097. doi:10.1371/journal.pmed1000097

**Once you have completed this checklist, please save a copy and upload it as part of your submission. Please DO NOT include this checklist as part of the main manuscript document. It must be uploaded as a separate file.**

For peer review only
