# Supplementary material for: Work of being an adult patient with chronic kidney disease: a systematic review of qualitative studies
Source: PubMed Central journal article supplement — BMJ Open. 2018 Sep 4;8(9):e023507. doi: 10.1136/bmjopen-2018-023507 (PMC6129107; doi:10.1136/bmjopen-2018-023507), 2018-09-04
Supplement: bmjopen-2018-023507supp001.pdf [file bmjopen-2018-023507supp001.pdf]

## Appendix 1. Search strategy

- 1 exp Renal Insufficiency, Chronic/
- 2 Renal Insufficiency/
- 3 exp Renal Replacement Therapy/
- 4 Hemodialysis Units, Hospital/
- 5 (chronic kidney or chronic renal or chronic nephropath\*).ti,ab,kf.
- 6 (kidney failure\*1 or renal failure\*1).ti,ab,kf.
- 7 (renal insufficienc\* or kidney insufficienc\*).ti,ab,kf.
- 8 (dialysis or predialysis).ti,ab,kf.
- 9 (hemodialysis or haemodialysis).ti,ab,kf.
- 10 (hemofiltration or haemofiltration).ti,ab,kf.
- 11 (hemodiafiltration or haemodiafiltration).ti,ab,kf.
- 12 (end-stage renal or end-stage kidney or endstage renal or endstage kidney).ti,ab,kf.
- 13 (stage 5 and (renal disease\*1 or kidney disease\*1)).ti,ab,kf.
- 14 (kidney transplant\* or renal transplant\* or kidney graft\* or renal graft\* or kidney replacement\*1 or renal replacement\*1).ti,ab,kf.
- 15 (CKF or CKD or CRF or CRD).ti,ab,kf.
- 16 (ESKD or ESRD or ESKF or ESRF).ti,ab,kf.
- 17 (CAPD or CCPD or APD).ti,ab,kf.
- 18 or/1-17
- 19 exp qualitative research/
- 20 qualitativ\*.ti,ab,kf.
- 21 interviews as topic/
- 22 interview\*.ti,ab,kf.
- 23 focus groups/
- 24 focus group\*1.ti,ab,kf.
- 25 grounded theory/ or (grounded theor\* or grounded study or grounded studies or grounded research or grounded analys\*).ti,ab,kf.
- 26 phenomenol\*.ti,ab,kf.
- 27 (ethnograph\* or ethnonurs\* or ethno-graph\* or ethno-nurs\*).ti,ab,kf.
- 28 (story or stories or storytelling or narrative\*1 or narration\*1).ti,ab,kf.
- 29 (open-ended or open question\* or text\*).ti,ab,kf.
- 30 Narration/ or personal narratives/ or personal narratives as topic/
- 31 (discourse\* analys\* or discours\* analys\*).ti,ab,kf.
- 32 content\* analys\*.ti,ab,kf.
- 33 ethnological.ti,ab,kf.
- 34 purposive sampl\*.ti,ab,kf.
- 35 (constant comparative or constant comparison\*1).ti,ab,kf.
- 36 theoretical sampl\*.ti,ab,kf.
- 37 (theme\* or thematic\*).ti,ab,kf.
- 38 (emic or etic or hermeneutic\* or heuristic\* or semiotic\*).ti,ab,kf.
- 39 data saturat\*.ti,ab,kf.
- 40 participant observ\*.ti,ab,kf.

- 41 exp Humanism/ or (humanistic\* or existential\* or experiential\* or paradigm\*).ti,ab,kf.
- 42 Postmodernism/ or (social construct\* or postmodern\* or post-modern\* or poststructural\* or post-structural\* or feminis\* or constructivis\*).ti,ab,kf.
- 43 (action research or cooperative inquir\* or co-operative inquir\*).ti,ab,kf.
- 44 human science.ti,ab,kf.
- 45 biographical method\*.ti,ab,kf.
- 46 life world.ti,ab,kf.
- 47 theoretical saturation.ti,ab,kf.
- 48 group discussion\*1.ti,ab,kf.
- 49 direct observation\*.ti,ab,kf.
- 50 mixed method\*.ti,ab,kf.
- 51 (observational method\* or observational approach\*).ti,ab,kf.
- 52 key informant\*1.ti,ab,kf.
- 53 (field study or field studies or field research\* or field work\* or fieldwork\*).ti,ab,kf.
- 54 (semi-structured or semistructured or unstructured or un-structured or informal or in-depth or indepth).ti,ab,kf.
- 55 "face-to-face".ti,ab,kf.
- 56 ((guide or structured) adj5 (discussion\*1 or questionnaire\*1)).ti,ab,kf.
- 57 (heidegger\* or colaizzi\* or speigelberg\* or van manen\* or van kaam\* or merleau ponty\* or husserl\* or giorgi\* or foucault\* or corbin\* or glaser\*).ti,ab,kf.
- 58 or/19-57
- 59 Consumer Behavior/
- 60 attitude/ or exp attitude to health/ or Attitude to Death/
- 61 personal satisfaction/
- 62 exp Emotions/
- 63 Stress, psychological/
- 64 exp Patients/px
- 65 Caregivers/px
- 66 professional-patient relations/ or nurse-patient relations/ or physician-patient relations/
- 67 professional-family relations/
- 68 Empathy/
- 69 Feedback/
- 70 ((patient\*1 or client\*1 or user\*1 or consumer\*1 or personal or carer\*1 or caregiver\*1 or care-giver\* or family\*1 or families) and (experienc\* or perspective\*1 or perception\*1 or opinion\*1 or account or accounts or attitude\*1 or view or views or viewpoint\*1 or satisf\* or unsatisf\* or dissatisf\* or disatisf\* or belief\*1 or believ\*).ti.
- 71 ((patient\*1 or client\*1 or user\*1 or consumer\*1 or personal or carer\*1 or caregiver\*1 or care-giver\* or family\*1 or families) adj3 (experienc\* or perspective\*1 or perception\*1 or opinion\*1 or account or accounts or attitude\*1 or view or views or viewpoint\*1 or satisf\* or unsatisf\* or dissatisf\* or disatisf\* or belief\*1 or believ\*).ab,kf.
- 72 ((patient\*1 or client\*1 or user\*1 or consumer\*1 or personal or carer\*1 or caregiver\*1 or care-giver\* or family\*1 or families) and (emotion\* or feeling\*1 or happy or happiness or unhappy or unhappiness or sad or sadness or anger or angry or anxiet\* or anxious\* or worry or worries or worried or worrying or troubled or troubling or troubles or troublesome or trouble-some or frustrat\* or stress\* or distress\* or embarrass\* or empath\* or accept\* or alone or lonely or loneliness or fear or fears or fearing or feared or afraid or scary or scared or bother\* or unbother\* or pleased or displeased\* or concern\* or burden\* or hassl\* or convenien\* or

- inconvenien\* or confus\* or hope or hopeless or hopeful or trust or trusts or mistrust\* or distrust\* or entrust\* or trusting or trusted or confiden\* or unconfiden\*).ti.
- 73 ((patient\* or client\* or user\* or consumer\* or personal or carer\* or caregiver\* or care-giver\* or family\* or families) adj3 (emotion\* or feeling\* or happy or happiness or unhappy or unhappiness or sad or sadness or anger or angry or anxiet\* or anxious\* or worry or worries or worried or worrying or troubled or troubling or troubles or troublesome or trouble-some or frustrate\* or stress\* or distress\* or embarrass\* or empath\* or accept\* or alone or lonely or loneliness or fear or fears or fearing or feared or afraid or scary or scared or bother\* or unbother\* or pleased or displeased\* or concern\* or burden\* or hassl\* or convenien\* or inconvenien\* or confus\* or hope or hopeless or hopeful or trust or trusts or mistrust\* or distrust\* or entrust\* or trusting or trusted or confiden\* or unconfiden\*).ab,kf.
- 74 (life experience\* or lived experience\*1 or actual experience\* or real experience\*1).ti,ab,kf.
- 75 or/59-74
- 76 18 and 58 and 75
- 77 (kidney or renal or nephropath\* or dialysis or predialysis or hemodialysis or haemodialysis or hemofiltration or haemofiltration or hemodiafiltration or haemodiafiltration or CKF or CKD or CRF or CRD or ESKD or ESRD or ESKF or ESRF or CAPD or CCPD or APD).ti. (419253)
- 78 qualitativ\*.ti. or qualitative research/
- 79 ((patient\* or client\* or user\* or consumer\*1 or personal or carer\* or caregiver\* or care-giver\* or family\* or families) and experiences).ti.
- 80 ((patient\* or client\* or user\* or consumer\* or personal or carer\* or caregiver\* or care-giver\* or family\* or families) adj2 experienc\*).ti.
- 81 77 and (78 or 79 or 80)
- 82 76 or 81
- 83 exp animals/ not humans/
- 84 (news or comment or editorial or letter or case reports or randomized controlled trial).pt.
- 85 case report.ti.
- 86 82 not (83 or 84 or 85)
- 87 limit 86 to (english spanish portuguese language and yr="2000 -Current")
